# Supplementary material for: SOX9 regulation of Hexokinase 1 controls neuroinflammatory astrocyte subtypes in neuropathic pain
Source: Research Square preprint supplement (doi:10.21203/rs.3.rs-5916660/v1), 2025-02-19
Supplement: Supplementary file 1 [file 8fe45ef44e61385e4a4b5e75.xlsx]

## Sheet: Sheet1
Supplement Table _KEGG analysis, related to Figure 4A
KEGG analysis of downregulated DEGs in SNI_shHK1 vs SNI	Gene name	p_val_adj	log10 (p_val_adj）
Cytokine-cytokine receptor interaction (ID: rno04060)	Il1rn, Bmp4, Cxcl13, Ccl4, Ccl17, Ccl3, Ccl5, Xcl1, Ltb, Tnfsf9, Tnf, Pf4, Cxcr4, Il1a, Gdf15, Tnfrsf13c, Cxcl16	3.32e-06	-5.47886
NF-kappa B signaling pathway (ID: rno04064)	Rp1, Ccl4, Lck, Ltb, Tnf, Lat, Tnfrsf13c	0.00365	-2.43771
Chemokine signaling pathway (ID: rno04062)	Ccl3, Ccl4, Ccl17, Ccl5, Xcl1, Pf4, Cxcr4, Cxcl13, Cxcl16	0.00406	-2.39147
Apoptosis (ID: rno04210)	Lmnb1, Sptan1, Gzmbl2, Tnf, Prf1, Tuba1b, Ctsw	0.0119	-1.92445
PI3K-Akt signaling pathway (ID: rno04151)	Ddit4, Itgb7, Itgb8, Ccnd3, Ccnd2, Itga4, Ntrk2, Ppp2r2b, Spp1, Kitlg	0.0354	-1.451
HIF-1 signaling pathway (ID: rno04066)	Cdk1, Aldoc, Hmox1	0.291	-0.536107
Glycolysis / Gluconeogenesis (ID: rno00010)	Cdk1, Aldoc	0.351	-0.454693
Ras signaling pathway (ID: rno04014)	Lat, Kitlg, Ntrk2, Calm1	0.422	-0.374688
Supplement Table _KEGG analysis, related to Figure 4B
KEGG analysis of upregulated DEGs in SHAM_HK1 vs SHAM	Gene name	p_val_adj	log10 (p_val_adj）
Cytokine-cytokine receptor interaction (ID: rno04060)	Il1rn, Il10, Il1a, Ccl17, Ccl5, Xcl1, Gdf15, Ccl2, Il2rb, Il2rg, Cxcr2, Ccr2, Tnf, Faslg, Cxcr6, Cxcr4, Ccr9, Cd27, Tnfrsf14, Osm, Il33, Cxcl13	6.22e-06	-5.20621
PI3K-Akt signaling pathway (ID: rno04151)	Pdgfa, Ccnd2, Ppp2r2c, Ppp2r2b, Lpar1, Sgk1, Itgb8, Spp1, Fgfr2, Gng8, Il2rb, Il2rg, Cdkn1a, Ntrk2, Faslg, Kitlg, Flt3, Ddit4, Itgb7, Ywhaq, Col9a3, Osm, Kdr	8.18e-05	-4.08725
Apoptosis (ID: rno04210)	Lmnb1, Pmaip1, Bcl2a1, Sptan1, Gzmbl2, Ctsd, Gadd45g, Tnf, Faslg, Prf1, Tuba1b, Birc5, Ctsw	0.000417	-3.37986
Chemokine signaling pathway (ID: rno04062)	Ccl2, Ccl17, Ccl5, Ccr2, Cxcr2, Xcl1, Cxcr6, Cxcr4, Ccr9, Cxcl13, Gng8, Gnai1	0.0046	-2.33724
NF-kappa B signaling pathway (ID: rno04064)	Rp1, Ptgs2, Bcl2a1, Plau, Cd14, Tnf, Vcam1, Lck	0.0105	-1.97881
Metabolic pathways (ID: rno01100)	RGD1309350, Ak9, Dhrs9, Scd2, Cyp51, Ak7, Psat1, Maob, Acat2, Eno3, Adpgk, Ddc, Ptgds, Fdft1, Ass1, Cyp2j10, Alox15, Ca3, Agpat4, Idi1, Hmgcs1, Degs2, Ugt8, Gstm1, Tecr, Dctpp1, Pla2g2d, Phgdh, Gal3st1, Blvra, Msmo1, Ptgs2, Art2b, Dut, Car2, Gsta6, Ca14, Bcat1, Cdk1, Glul, Mgst1, Qdpr, Asrgl1, Cox6a2, Sqle, Rrm2	0.0304	-1.51713
TNF signaling pathway (ID: rno04668)	Ccl2, Ptgs2, Socs3, Ccl5, Tnf, Vcam1, Mmp9	0.0422	-1.37469
Ras signaling pathway (ID: rno04014)	Pdgfa, Calm1, Kdr, Ntrk2, Faslg, Pla2g2d, Kitlg, Fgfr2, Flt3, Gng8	0.0877	-1.057
Supplement Table _KEGG analysis_related to Figure 4E
KEGG analysis of upregulated DEGs in treatments of SHAM, SNI, HK1, and SNI_shHK1	Gene name	p_val_adj	log10 (p_val_adj）
Cytokine-cytokine receptor interaction (ID: rno04060)	Il1rn, Il1a, Ccr9, Cxcr2, Faslg, Pf4, Cxcr4, Osm, Cxcl13, Il1b, Cxcl16	0.00123	-2.91009
Apoptosis (ID: rno04210)	Bcl2a1, Tuba1c, Sptan1, Birc5, Gadd45g, Faslg, Prf1, Ctsw	0.00123	-2.91009
PI3K-Akt signaling pathway (ID: rno04151)	Ccne1, Ddit4, Itgb7, Ccnd2, Ntrk2, Spp1, Faslg, Osm, Myc, Kitlg, Cd19	0.00436	-2.36051
Chemokine signaling pathway (ID: rno04062)	Cxcr2, Pf4, Cxcr4, Ccr9, Cxcl13, Cxcl16	0.0379	-1.42136
NF-kappa B signaling pathway (ID: rno04064)	Il1b, Lck, Plau, Bcl2a1	0.0586	-1.2321
TNF signaling pathway (ID: rno04668)	Il1b, Socs3	0.394	-0.404504
KEGG analysis of downregulated DEGs in treatments of SHAM, SNI, HK1, and SNI_shHK1	Gene name	p_val_adj	log10 (p_val_adj）
Cell adhesion molecules (CAMs) (ID: rno04514)	Cldn11, Mag, Jam3, Nrcam, Itgb8, Vcan, Igsf11, Nectin2, Nfasc, Lrrc4b, Vcam1, Esam, Ncam1, Ncam2	6.27e-06	-5.20273
Gap junction (ID: rno04540)	Pdgfrb, Tjp1, Pdgfa, Tubb6, Tubb4a, Gucy1a1, Gucy1b1, Gnai1	0.00054	-3.26761
Cell cycle (ID: rno04110)	Cdkn2c, Tgfb2, Cdkn2d, Ccnd1, Gadd45b, Ywhaq, Cdkn1c, Ccnd3, Cdkn1a	0.000869	-3.06098
Metabolic pathways (ID: rno01100)	Cyp51, Mif, Psat1, Cyp2j10, Acat2, Adpgk, Ca4, Ptgds, Ndufa4l2, Mgst3, Qdpr, Art2b, Gucy1a1, Fut9, Hmgcs1, Ugt8, Idi1, Plpp3, Tecr, Gstp1, Phgdh, Gal3st1, Aldoc, Agt, Pygm, Hsd11b1, Msmo1, Upp1, Car2, Gsta6, Ca14, Cox4i2, Glul, Gucy1b1, Asrgl1	0.00335	-2.47496
Cellular senescence (ID: rno04218)	Tgfb2, Ccnd1, Ccnd3, Ets1, Cdkn1a, Gadd45b	0.0751	-1.12436
Fatty acid metabolism (ID: rno01212)	Acat2, Tecr	0.284	-0.546682
