# Supplementary material for: SOX9 regulation of Hexokinase 1 controls neuroinflammatory astrocyte subtypes in neuropathic pain
Source: Research Square preprint supplement (doi:10.21203/rs.3.rs-5916660/v1), 2025-02-19
Supplement: Supplementary file 2 [file bfbfc4c9668c7f329da7d4e5.xlsx]

## Sheet: Sheet1
	p_val	avg_log2FC	pct.1	pct.2	p_val_adj	cluster	gene
Ptn	3.47469e-195	-4.5149	0.634	0.993	3.9264e-192	0	Ptn
Septin7	3.23745e-186	-3.02125	0.847	0.993	3.65832e-183	0	Septin7
Fam183a	9.73686e-172	3.90801	0.875	0.235	1.10027e-168	0	Fam183a
Mlf1	2.94671e-165	3.14172	0.843	0.171	3.32978e-162	0	Mlf1
Dnah12	3.0131e-161	3.22731	0.887	0.382	3.4048e-158	0	Dnah12
Dynlrb2	5.88462e-154	4.11304	0.889	0.486	6.64963e-151	0	Dynlrb2
Septin4	1.0048e-153	-3.18459	0.591	0.95	1.13542e-150	0	Septin4
Id4	4.74916e-150	3.26668	0.868	0.318	5.36655e-147	0	Id4
Csrp2	6.40761e-148	4.11342	0.879	0.43	7.2406e-145	0	Csrp2
Vim	2.21846e-145	3.94696	0.896	0.499	2.50686e-142	0	Vim
Drc1	1.22453e-144	2.27368	0.779	0.185	1.38372e-141	0	Drc1
Gstp1	1.27881e-144	-2.59395	0.777	0.97	1.44506e-141	0	Gstp1
Tekt2	4.36552e-144	1.65545	0.738	0.142	4.93304e-141	0	Tekt2
Rsph1	1.72138e-143	2.47495	0.809	0.242	1.94516e-140	0	Rsph1
Cfap126	1.90932e-142	3.1934	0.853	0.371	2.15754e-139	0	Cfap126
Slc12a2	2.81079e-142	-2.66849	0.413	0.924	3.17619e-139	0	Slc12a2
Apod	1.17238e-139	-5.43775	0.6	0.939	1.32479e-136	0	Apod
Crip1	1.57341e-139	3.47713	0.858	0.36	1.77795e-136	0	Crip1
RGD1565611	4.06001e-138	2.5369	0.809	0.31	4.58781e-135	0	RGD1565611
Mns1	4.19881e-138	2.52752	0.808	0.253	4.74465e-135	0	Mns1
Fermt2	1.75883e-137	-1.82689	0.658	0.971	1.98747e-134	0	Fermt2
Capsl	1.37961e-136	2.3391	0.804	0.303	1.55896e-133	0	Capsl
Dnai4	2.75725e-136	2.48273	0.783	0.212	3.11569e-133	0	Dnai4
Ncam2	6.22954e-136	-1.67838	0.283	0.893	7.03938e-133	0	Ncam2
Stmn4	1.06985e-135	-3.28475	0.502	0.896	1.20893e-132	0	Stmn4
Omg	3.23645e-135	-1.71843	0.474	0.886	3.65719e-132	0	Omg
Gstm1	3.74598e-135	3.58145	0.872	0.543	4.23295e-132	0	Gstm1
Spa17	3.37824e-132	1.9517	0.8	0.269	3.81742e-129	0	Spa17
Sox2	7.4244e-132	2.69533	0.892	0.577	8.38958e-129	0	Sox2
Cfap299	1.06032e-131	2.21605	0.774	0.273	1.19816e-128	0	Cfap299
Tubb4a	2.30525e-130	-4.33855	0.513	0.895	2.60493e-127	0	Tubb4a
Mt3	7.31002e-130	4.58606	0.891	0.697	8.26032e-127	0	Mt3
Elapor2	3.23094e-129	-0.862171	0.166	0.797	3.65097e-126	0	Elapor2
ENSRNOG00000066616	3.24108e-129	4.07909	0.7	0.135	3.66242e-126	0	ENSRNOG00000066616
Cdhr4	1.1502e-128	2.30991	0.777	0.252	1.29972e-125	0	Cdhr4
Hcn2	1.32576e-128	-1.71214	0.343	0.831	1.49811e-125	0	Hcn2
Chchd10	3.06604e-127	2.98907	0.87	0.547	3.46463e-124	0	Chchd10
Pdlim4	3.16797e-127	2.44184	0.781	0.249	3.57981e-124	0	Pdlim4
ENSRNOG00000000875	5.71195e-126	2.40233	0.804	0.3	6.45451e-123	0	ENSRNOG00000000875
Gjc2	1.11085e-125	-1.941	0.385	0.846	1.25526e-122	0	Gjc2
ENSRNOG00000013320	9.1839e-125	3.2297	0.851	0.531	1.03778e-121	0	ENSRNOG00000013320
Ugt8	1.15367e-123	-3.06058	0.504	0.876	1.30365e-120	0	Ugt8
Cfap44	5.68563e-123	2.03406	0.711	0.136	6.42477e-120	0	Cfap44
Ccdc153	9.64724e-123	3.05428	0.845	0.589	1.09014e-119	0	Ccdc153
Slc48a1	1.44815e-122	-1.86431	0.319	0.893	1.6364e-119	0	Slc48a1
Tmem125.1	1.19678e-121	-1.99673	0.362	0.859	1.35236e-118	0	Tmem125.1
Slain1	1.36248e-121	-1.96421	0.411	0.872	1.53961e-118	0	Slain1
Akr7a3	1.54477e-120	-0.664119	0.066	0.746	1.74559e-117	0	Akr7a3
Aplp1	5.18989e-120	-4.16025	0.338	0.874	5.86457e-117	0	Aplp1
Sox10	7.51622e-120	-1.16395	0.315	0.825	8.49333e-117	0	Sox10
Cldn11	7.03521e-119	-3.48066	0.496	0.878	7.94978e-116	0	Cldn11
Mt2A	1.41733e-118	2.24981	0.685	0.065	1.60158e-115	0	Mt2A
ENSRNOG00000024338	2.20527e-118	2.39617	0.845	0.517	2.49195e-115	0	ENSRNOG00000024338
Cnp	7.9867e-117	-4.0414	0.525	0.928	9.02497e-114	0	Cnp
Gal3st1	3.10265e-116	-0.899632	0.179	0.775	3.506e-113	0	Gal3st1
Riiad1	5.5098e-116	2.12352	0.77	0.317	6.22608e-113	0	Riiad1
Rbfox1	3.22484e-115	2.62462	0.791	0.452	3.64407e-112	0	Rbfox1
RGD1306233	6.42678e-115	2.48589	0.83	0.526	7.26226e-112	0	RGD1306233
Cadm4	6.64432e-115	-1.59577	0.121	0.81	7.50808e-112	0	Cadm4
Ccdc113	1.16029e-114	1.75941	0.713	0.286	1.31113e-111	0	Ccdc113
Pcdh9	1.8369e-114	-1.28461	0.294	0.875	2.0757e-111	0	Pcdh9
Nnat	5.42402e-113	3.09515	0.857	0.607	6.12915e-110	0	Nnat
Cdh13	8.40863e-113	-0.472817	0.026	0.666	9.50175e-110	0	Cdh13
Pcbp4	1.24267e-112	-1.31195	0.298	0.836	1.40421e-109	0	Pcbp4
Ttll7	2.70629e-112	-2.53788	0.474	0.914	3.0581e-109	0	Ttll7
Klk6	5.62641e-112	-2.6596	0.147	0.791	6.35785e-109	0	Klk6
Cfap45	7.02612e-112	2.16871	0.742	0.267	7.93951e-109	0	Cfap45
Ccdc40	1.17399e-111	2.11141	0.749	0.246	1.32661e-108	0	Ccdc40
Elmod1	1.32785e-111	2.14837	0.764	0.368	1.50047e-108	0	Elmod1
Ptgds	1.78053e-110	-5.07201	0.574	0.889	2.012e-107	0	Ptgds
Iqca1	2.98604e-110	1.73432	0.696	0.23	3.37423e-107	0	Iqca1
Akap14	4.69575e-110	1.7557	0.708	0.24	5.3062e-107	0	Akap14
Cryab	5.73861e-110	-3.66673	0.4	0.899	6.48463e-107	0	Cryab
Enkur	7.32046e-110	1.91905	0.762	0.417	8.27212e-107	0	Enkur
Car2	9.34197e-110	-2.14516	0.485	0.853	1.05564e-106	0	Car2
ENSRNOG00000043390	1.19704e-109	-0.775059	0.315	0.797	1.35266e-106	0	ENSRNOG00000043390
Ankrd66	1.97644e-109	2.4475	0.798	0.455	2.23338e-106	0	Ankrd66
AABR07005985.1	2.84569e-109	1.89316	0.674	0.143	3.21563e-106	0	AABR07005985.1
Tmem212	1.72248e-107	3.28419	0.823	0.619	1.9464e-104	0	Tmem212
Selenop	3.90232e-107	-2.64549	0.67	0.914	4.40962e-104	0	Selenop
Mag	1.94047e-106	-3.1828	0.511	0.853	2.19273e-103	0	Mag
ENSRNOG00000004564	3.02783e-106	2.5143	0.796	0.519	3.42145e-103	0	ENSRNOG00000004564
Snapc2	4.01346e-106	-0.890792	0.168	0.784	4.53521e-103	0	Snapc2
Mgst3	5.97701e-106	-1.83555	0.458	0.871	6.75402e-103	0	Mgst3
Luzp2	2.33959e-105	-1.64294	0.351	0.897	2.64373e-102	0	Luzp2
Opalin	3.46354e-105	-2.62888	0.523	0.881	3.9138e-102	0	Opalin
Gja1	4.16744e-105	1.51256	0.813	0.422	4.70921e-102	0	Gja1
Cfap20dc	2.67976e-104	-2.84919	0.408	0.864	3.02813e-101	0	Cfap20dc
Pdgfa	4.60088e-104	-1.40774	0.336	0.864	5.19899e-101	0	Pdgfa
Tmem107	5.70704e-104	2.6255	0.815	0.59	6.44896e-101	0	Tmem107
Carhsp1	6.15172e-103	-1.62851	0.27	0.86	6.95145e-100	0	Carhsp1
Fam166b	1.01414e-102	2.42761	0.813	0.653	1.14598e-99	0	Fam166b
Gstt3	1.23301e-102	-1.49331	0.311	0.798	1.3933e-99	0	Gstt3
Tpm1	2.03326e-102	2.38011	0.872	0.695	2.29759e-99	0	Tpm1
Spaca9	4.60278e-102	2.31831	0.791	0.534	5.20114e-99	0	Spaca9
Scrg1	5.42618e-102	-1.64884	0.347	0.86	6.13158e-99	0	Scrg1
Spef2	1.4916e-101	2.06472	0.734	0.339	1.6855e-98	0	Spef2
AABR07017733.1	1.62207e-101	-1.00966	0.315	0.762	1.83294e-98	0	AABR07017733.1
Btbd3	2.91293e-101	-1.20586	0.294	0.811	3.29161e-98	0	Btbd3
ENSRNOG00000039749	3.6654e-101	2.40915	0.785	0.527	4.1419e-98	0	ENSRNOG00000039749
Caly	2.21857e-99	2.29766	0.806	0.5	2.50698e-96	0	Caly
Ermn	5.38377e-99	-3.43424	0.517	0.888	6.08366e-96	0	Ermn
Ak9	6.85165e-99	2.34459	0.775	0.435	7.74236e-96	0	Ak9
Hydin	1.46202e-98	1.76222	0.704	0.284	1.65208e-95	0	Hydin
Olig1	2.91905e-98	-2.45198	0.372	0.892	3.29853e-95	0	Olig1
Ak7	1.57364e-97	1.99668	0.689	0.168	1.77821e-94	0	Ak7
Anxa5	1.08671e-96	1.91252	0.845	0.499	1.22799e-93	0	Anxa5
Zcchc18	1.3319e-96	2.03266	0.753	0.385	1.50505e-93	0	Zcchc18
Cabcoco1	5.48605e-96	1.69778	0.738	0.388	6.19924e-93	0	Cabcoco1
Zbbx	1.11579e-95	1.45087	0.662	0.218	1.26084e-92	0	Zbbx
Uchl1	1.71661e-95	1.72156	0.743	0.382	1.93976e-92	0	Uchl1
Slc24a2	2.68128e-95	-0.589519	0.087	0.699	3.02985e-92	0	Slc24a2
Mettl7a	3.08838e-95	-1.6322	0.47	0.89	3.48987e-92	0	Mettl7a
Ccdc39	5.90084e-95	1.97167	0.723	0.371	6.66795e-92	0	Ccdc39
Tmem88b	5.9357e-95	-0.814273	0.323	0.77	6.70734e-92	0	Tmem88b
S100b	1.13354e-94	1.80016	0.892	0.529	1.2809e-91	0	S100b
Efcab10	7.09284e-94	1.88274	0.76	0.506	8.01491e-91	0	Efcab10
Rsph9	7.78644e-94	2.06525	0.758	0.462	8.79867e-91	0	Rsph9
Dbndd2	1.7478e-93	-2.12613	0.723	0.937	1.97501e-90	0	Dbndd2
Fa2h	2.64301e-93	-1.68745	0.343	0.821	2.9866e-90	0	Fa2h
Hist3h2ba	3.36116e-93	-1.12433	0.319	0.8	3.79811e-90	0	Hist3h2ba
Spock3	3.59222e-93	-2.28426	0.37	0.868	4.05921e-90	0	Spock3
ENSRNOG00000011006	1.63682e-92	2.25538	0.766	0.508	1.84961e-89	0	ENSRNOG00000011006
Ppp1r14a	1.00876e-91	-1.87413	0.313	0.796	1.13989e-88	0	Ppp1r14a
Cpm	5.13317e-91	-1.08045	0.062	0.706	5.80048e-88	0	Cpm
Secisbp2l	1.00426e-90	-2.01532	0.534	0.895	1.13481e-87	0	Secisbp2l
Plp1	9.33997e-90	-4.35535	0.764	0.927	1.05542e-86	0	Plp1
Stmn1	1.60033e-89	-3.52995	0.57	0.89	1.80838e-86	0	Stmn1
Faim2	2.2493e-89	-1.2693	0.3	0.831	2.54171e-86	0	Faim2
C1ql1	6.89436e-89	-0.861124	0.125	0.654	7.79062e-86	0	C1ql1
Nipa1	2.51793e-88	-1.5148	0.413	0.872	2.84526e-85	0	Nipa1
App	3.22877e-88	-1.85575	0.809	0.928	3.64851e-85	0	App
Clu	1.22757e-87	1.58651	0.842	0.661	1.38716e-84	0	Clu
Cmtm5	2.89991e-87	-2.54478	0.472	0.908	3.2769e-84	0	Cmtm5
Spag6l	3.01535e-87	1.84742	0.743	0.47	3.40735e-84	0	Spag6l
Cfap43	1.62338e-86	1.62291	0.668	0.273	1.83442e-83	0	Cfap43
Glipr1l1	1.78888e-86	1.63051	0.732	0.48	2.02144e-83	0	Glipr1l1
ENSRNOG00000018960	2.62024e-86	1.88747	0.802	0.534	2.96087e-83	0	ENSRNOG00000018960
Psd3	2.96089e-86	-0.725291	0.2	0.738	3.34581e-83	0	Psd3
Plat	3.39793e-86	1.79187	0.738	0.39	3.83966e-83	0	Plat
Larp6	6.94344e-86	-0.833369	0.321	0.753	7.84608e-83	0	Larp6
Plekhh1	1.14324e-85	-1.36766	0.332	0.855	1.29186e-82	0	Plekhh1
Edil3	2.44222e-85	-3.21968	0.477	0.899	2.75971e-82	0	Edil3
S100a11	2.58033e-85	1.30753	0.734	0.28	2.91577e-82	0	S100a11
Calm1	3.16601e-85	1.71245	0.936	0.824	3.57759e-82	0	Calm1
Ccdc30	1.37285e-84	1.96801	0.745	0.453	1.55132e-81	0	Ccdc30
Csrp1	2.1046e-84	-1.47941	0.4	0.788	2.3782e-81	0	Csrp1
Myb	5.91368e-84	1.86411	0.675	0.309	6.68246e-81	0	Myb
Pifo	7.17706e-82	1.78167	0.726	0.49	8.11008e-79	0	Pifo
Tmeff1	8.00117e-82	-1.14097	0.325	0.788	9.04132e-79	0	Tmeff1
Bcl2l15	1.46622e-81	2.41152	0.736	0.527	1.65683e-78	0	Bcl2l15
Gpr37	2.09546e-81	-1.70106	0.426	0.868	2.36787e-78	0	Gpr37
Cfap69	2.63918e-81	1.73657	0.649	0.273	2.98228e-78	0	Cfap69
Igfbpl1	3.92144e-81	2.13304	0.757	0.597	4.43123e-78	0	Igfbpl1
Gnai1	2.06122e-80	-1.07668	0.366	0.773	2.32917e-77	0	Gnai1
Smkr1	3.48864e-80	1.70244	0.708	0.456	3.94216e-77	0	Smkr1
Gng8	5.13482e-80	-1.45641	0.347	0.775	5.80234e-77	0	Gng8
Phyhipl	1.76016e-79	-1.25636	0.37	0.846	1.98899e-76	0	Phyhipl
Cyp2j10	5.80347e-79	-0.950214	0.302	0.728	6.55792e-76	0	Cyp2j10
Adamts4	1.64837e-78	-0.630326	0.289	0.713	1.86266e-75	0	Adamts4
Tmem47	3.21966e-78	1.53016	0.758	0.436	3.63822e-75	0	Tmem47
Ndnf	4.1816e-78	-0.504879	0.13	0.631	4.72521e-75	0	Ndnf
Gpm6b	5.65712e-78	-2.03535	0.485	0.872	6.39255e-75	0	Gpm6b
ENSRNOG00000021943	2.41066e-77	1.03851	0.621	0.302	2.72405e-74	0	ENSRNOG00000021943
Ccdc146	5.59719e-77	1.75352	0.674	0.316	6.32482e-74	0	Ccdc146
Acot7	6.72195e-77	-1.41735	0.443	0.776	7.5958e-74	0	Acot7
Septin8	6.75831e-77	-1.89745	0.375	0.789	7.63689e-74	0	Septin8
Rusc1	9.02541e-77	-1.62487	0.613	0.9	1.01987e-73	0	Rusc1
RGD1308544	1.94393e-76	1.82407	0.736	0.54	2.19664e-73	0	RGD1308544
Ccnd2	3.00391e-76	1.73562	0.774	0.521	3.39442e-73	0	Ccnd2
Cyfip2	4.56127e-76	-0.48596	0.064	0.646	5.15423e-73	0	Cyfip2
Pmp22	6.45029e-75	-2.34965	0.581	0.84	7.28883e-72	0	Pmp22
Tmeff2	2.72071e-74	-1.14424	0.353	0.815	3.0744e-71	0	Tmeff2
Pllp	3.43179e-74	-3.32052	0.445	0.841	3.87792e-71	0	Pllp
Hmgcs1	3.82542e-74	-2.05878	0.345	0.826	4.32272e-71	0	Hmgcs1
Vcan	5.73631e-74	-0.91085	0.102	0.631	6.48204e-71	0	Vcan
Ccdc162	7.43299e-74	1.37005	0.574	0.188	8.39928e-71	0	Ccdc162
AABR07056633.1	9.73144e-74	1.42922	0.615	0.207	1.09965e-70	0	AABR07056633.1
Ube2d1	1.58829e-73	-1.89334	0.57	0.881	1.79477e-70	0	Ube2d1
Hspa2	3.66287e-72	1.62596	0.772	0.509	4.13904e-69	0	Hspa2
Pls1	4.67827e-72	-0.498667	0.062	0.615	5.28645e-69	0	Pls1
Sec11c	6.26977e-72	-3.54158	0.783	0.938	7.08484e-69	0	Sec11c
Sox9	8.70642e-72	2.03496	0.785	0.704	9.83825e-69	0	Sox9
Ninj2	3.9101e-71	-2.03348	0.447	0.861	4.41841e-68	0	Ninj2
Anxa2	7.6969e-71	1.73575	0.681	0.359	8.6975e-68	0	Anxa2
RGD1560394	1.75555e-70	1.64554	0.758	0.569	1.98377e-67	0	RGD1560394
Tshz2	1.12603e-69	1.39791	0.67	0.352	1.27242e-66	0	Tshz2
Gpd1	1.6602e-68	-0.91185	0.242	0.762	1.87602e-65	0	Gpd1
Asrgl1	3.61162e-68	-0.8982	0.526	0.871	4.08113e-65	0	Asrgl1
Olfml1	4.20136e-68	-1.06929	0.332	0.714	4.74753e-65	0	Olfml1
Eid1	4.91305e-68	-1.13408	0.851	0.959	5.55175e-65	0	Eid1
Tecr	3.6755e-67	-1.75709	0.828	0.965	4.15332e-64	0	Tecr
Nid1	4.88922e-66	-1.10502	0.166	0.629	5.52482e-63	0	Nid1
Plec	5.88534e-66	1.50685	0.617	0.307	6.65044e-63	0	Plec
Wscd1	7.26418e-66	-1.70875	0.349	0.766	8.20852e-63	0	Wscd1
ENSRNOG00000032729	8.72767e-66	1.45085	0.747	0.524	9.86227e-63	0	ENSRNOG00000032729
Nkx6-2	2.82755e-65	-2.18592	0.438	0.824	3.19513e-62	0	Nkx6-2
Nkd1	3.73179e-65	-0.957521	0.194	0.684	4.21692e-62	0	Nkd1
Tubb4b	8.20223e-65	1.78243	0.821	0.642	9.26852e-62	0	Tubb4b
Cfap100	2.53907e-64	1.72846	0.694	0.552	2.86914e-61	0	Cfap100
Cd24	3.49626e-64	1.76204	0.649	0.355	3.95078e-61	0	Cd24
Spag17	5.17705e-64	1.8147	0.643	0.333	5.85007e-61	0	Spag17
Plcl1	8.45626e-64	-1.25394	0.462	0.76	9.55558e-61	0	Plcl1
Tmem200c	9.83592e-64	-1.0202	0.375	0.772	1.11146e-60	0	Tmem200c
Syde2	1.73852e-63	-0.347045	0.174	0.671	1.96453e-60	0	Syde2
Gjb1	1.86873e-63	-2.61997	0.442	0.83	2.11167e-60	0	Gjb1
Iqcg	2.34157e-63	1.4389	0.626	0.284	2.64598e-60	0	Iqcg
Cavin3	2.36564e-63	1.04364	0.734	0.364	2.67317e-60	0	Cavin3
Zcchc12	5.1905e-63	1.73941	0.708	0.571	5.86526e-60	0	Zcchc12
Adgb	9.82737e-63	1.55334	0.604	0.265	1.11049e-59	0	Adgb
Abca2	5.12917e-62	-1.08582	0.232	0.746	5.79596e-59	0	Abca2
Scg5	1.41613e-61	1.80856	0.809	0.706	1.60022e-58	0	Scg5
Gnao1	1.76972e-61	-0.967791	0.483	0.875	1.99979e-58	0	Gnao1
Rab33a	2.78025e-61	-1.32927	0.44	0.821	3.14168e-58	0	Rab33a
Ntrk2	6.93602e-61	1.30278	0.749	0.483	7.8377e-58	0	Ntrk2
Ccdc180	8.17148e-61	1.2337	0.538	0.132	9.23377e-58	0	Ccdc180
Calb1	1.08989e-60	1.05524	0.596	0.296	1.23157e-57	0	Calb1
Lrrc34	4.37582e-60	1.59409	0.638	0.406	4.94468e-57	0	Lrrc34
Cd200	9.2989e-60	-0.746103	0.302	0.691	1.05078e-56	0	Cd200
Idi1	4.37748e-59	-1.33657	0.553	0.896	4.94656e-56	0	Idi1
Jam3	1.21048e-58	-1.14072	0.608	0.887	1.36784e-55	0	Jam3
Slco3a1	1.4152e-58	-1.09699	0.309	0.705	1.59917e-55	0	Slco3a1
Crip2	1.94103e-58	1.13255	0.762	0.453	2.19336e-55	0	Crip2
Sptan1	3.60796e-58	1.48217	0.779	0.643	4.077e-55	0	Sptan1
Olig2	4.42837e-58	-0.996136	0.166	0.691	5.00406e-55	0	Olig2
Glul	4.62841e-58	-2.79967	0.736	0.86	5.2301e-55	0	Glul
Elavl3	7.95873e-58	-1.17809	0.443	0.814	8.99336e-55	0	Elavl3
S1pr5	1.05105e-57	-1.29692	0.447	0.818	1.18769e-54	0	S1pr5
Rtn4	1.29333e-57	-2.019	0.757	0.838	1.46146e-54	0	Rtn4
Htra1	1.79422e-57	-1.20786	0.302	0.693	2.02747e-54	0	Htra1
Iqgap2	2.33906e-57	1.54438	0.623	0.343	2.64314e-54	0	Iqgap2
Dner	4.07848e-57	0.934845	0.609	0.302	4.60868e-54	0	Dner
Mobp	4.23906e-57	-2.57182	0.496	0.804	4.79014e-54	0	Mobp
Ppp1r32	5.30468e-57	1.72041	0.666	0.424	5.99429e-54	0	Ppp1r32
Hs3st1	6.41069e-56	-1.64794	0.274	0.727	7.24408e-53	0	Hs3st1
Mbp	2.31878e-55	-3.24929	0.574	0.795	2.62022e-52	0	Mbp
Anks1b	3.12733e-55	-1.10799	0.438	0.857	3.53388e-52	0	Anks1b
Sncg	1.27003e-54	0.665294	0.44	0.232	1.43513e-51	0	Sncg
Ca14	2.91836e-54	-1.43328	0.428	0.798	3.29775e-51	0	Ca14
Gjc3	3.65687e-54	-1.81207	0.353	0.73	4.13226e-51	0	Gjc3
Rgs22	4.84845e-54	1.65463	0.63	0.382	5.47875e-51	0	Rgs22
Cep290	5.31582e-54	1.24756	0.626	0.344	6.00687e-51	0	Cep290
Josd2	8.11854e-54	-1.63455	0.602	0.895	9.17395e-51	0	Josd2
Rtkn	1.08829e-53	-0.721175	0.1	0.627	1.22977e-50	0	Rtkn
Mog	2.34255e-53	-2.89484	0.508	0.801	2.64708e-50	0	Mog
Cpd	2.5354e-53	-0.932199	0.506	0.818	2.865e-50	0	Cpd
Mapt	3.41247e-53	-1.79135	0.513	0.786	3.85609e-50	0	Mapt
Daw1	4.01918e-53	1.24251	0.662	0.517	4.54167e-50	0	Daw1
Cep126	5.45849e-53	1.4564	0.611	0.286	6.1681e-50	0	Cep126
Dnali1	2.68939e-52	1.50814	0.638	0.415	3.03901e-49	0	Dnali1
Enpp2	2.91465e-52	-2.34106	0.334	0.723	3.29355e-49	0	Enpp2
Lmna	3.19076e-52	-0.932066	0.409	0.788	3.60556e-49	0	Lmna
Tf	3.33669e-52	-3.36228	0.715	0.896	3.77046e-49	0	Tf
Scg3	3.96329e-52	-0.892237	0.249	0.669	4.47852e-49	0	Scg3
Slc1a2	5.61623e-52	-0.349899	0.136	0.549	6.34634e-49	0	Slc1a2
Sirt2	1.18583e-51	-1.38451	0.553	0.834	1.33999e-48	0	Sirt2
Bnip3	1.53687e-51	-1.14162	0.558	0.836	1.73666e-48	0	Bnip3
Pcp4	6.09438e-51	0.911918	0.521	0.268	6.88665e-48	0	Pcp4
Hmgn3	1.18976e-50	-1.11265	0.513	0.854	1.34443e-47	0	Hmgn3
Slc44a1	3.10385e-50	-2.10313	0.415	0.731	3.50735e-47	0	Slc44a1
Mlc1	5.74389e-50	1.07915	0.651	0.431	6.49059e-47	0	Mlc1
Sdc2	9.12672e-50	1.2564	0.738	0.54	1.03132e-46	0	Sdc2
Plagl1	9.3884e-50	0.981305	0.549	0.343	1.06089e-46	0	Plagl1
Tjp1	2.31877e-49	-0.906448	0.377	0.803	2.62021e-46	0	Tjp1
Sspn	4.76191e-49	-0.75607	0.37	0.781	5.38096e-46	0	Sspn
Rarres1	6.71683e-49	-0.26434	0.153	0.622	7.59002e-46	0	Rarres1
Fnbp1	7.08554e-49	-1.37407	0.33	0.754	8.00666e-46	0	Fnbp1
ENSRNOG00000049075	2.30417e-48	-1.38285	0.481	0.76	2.60371e-45	0	ENSRNOG00000049075
Ywhaq	2.33284e-48	-1.99344	0.792	0.847	2.63611e-45	0	Ywhaq
Msmo1	2.38861e-48	-1.38209	0.53	0.836	2.69913e-45	0	Msmo1
ENSRNOG00000003786	2.67859e-48	0.925739	0.743	0.471	3.02681e-45	0	ENSRNOG00000003786
Kndc1	2.69418e-48	-0.555116	0.321	0.791	3.04442e-45	0	Kndc1
Apbb1	5.3611e-48	-1.34684	0.213	0.684	6.05804e-45	0	Apbb1
Ezr	7.94153e-48	1.03398	0.619	0.416	8.97393e-45	0	Ezr
Ldlrap1	9.87612e-47	-1.0971	0.332	0.678	1.116e-43	0	Ldlrap1
Rhou	1.46465e-46	-1.56933	0.475	0.77	1.65506e-43	0	Rhou
Rnd2	2.38027e-46	-0.764052	0.281	0.718	2.6897e-43	0	Rnd2
Rflnb	5.02408e-46	0.507248	0.502	0.326	5.67721e-43	0	Rflnb
Sh3gl3	5.76136e-46	-0.947702	0.411	0.776	6.51034e-43	0	Sh3gl3
Lrrc36	7.32043e-46	1.94423	0.679	0.64	8.27209e-43	0	Lrrc36
Cdc42ep2	7.52667e-46	-1.63201	0.26	0.677	8.50514e-43	0	Cdc42ep2
Dixdc1	2.08164e-45	-0.456997	0.325	0.817	2.35226e-42	0	Dixdc1
Ednrb	2.28623e-45	1.13305	0.696	0.479	2.58344e-42	0	Ednrb
Acat2	4.89394e-45	-0.842511	0.487	0.763	5.53015e-42	0	Acat2
Kcna1	9.61377e-45	-2.47169	0.515	0.789	1.08636e-41	0	Kcna1
Ptprd	1.59163e-44	-1.0728	0.53	0.886	1.79854e-41	0	Ptprd
Nrcam	1.6344e-44	-0.348209	0.234	0.676	1.84687e-41	0	Nrcam
Ano4	2.91797e-44	-1.01029	0.426	0.696	3.29731e-41	0	Ano4
Rbp1	8.21464e-44	0.872466	0.672	0.477	9.28254e-41	0	Rbp1
Dnm3	9.40387e-44	-0.990371	0.247	0.664	1.06264e-40	0	Dnm3
Itih3	1.40928e-43	-0.81559	0.083	0.472	1.59249e-40	0	Itih3
Shisa4	3.67277e-43	-1.61266	0.538	0.789	4.15023e-40	0	Shisa4
Tnr	9.81693e-43	-0.312944	0.113	0.481	1.10931e-39	0	Tnr
Ccdc141	1.20751e-42	-0.335499	0.087	0.522	1.36449e-39	0	Ccdc141
Tspan2	1.4811e-42	-2.12163	0.532	0.815	1.67365e-39	0	Tspan2
Bex4	2.04966e-42	1.07607	0.628	0.498	2.31611e-39	0	Bex4
Igfbp5	7.82236e-42	2.00603	0.609	0.378	8.83926e-39	0	Igfbp5
Ccdc170	1.5987e-41	1.1974	0.621	0.416	1.80653e-38	0	Ccdc170
Tcf4	1.9262e-41	-0.825265	0.613	0.871	2.1766e-38	0	Tcf4
Crocc	2.21755e-41	1.26298	0.517	0.314	2.50583e-38	0	Crocc
Qdpr	2.30278e-41	-3.9058	0.366	0.695	2.60214e-38	0	Qdpr
ENSRNOG00000067240	2.66294e-41	-0.434119	0.225	0.657	3.00913e-38	0	ENSRNOG00000067240
Gng11	2.86252e-41	-3.29505	0.27	0.653	3.23465e-38	0	Gng11
Ccdc88a	4.44283e-41	-1.10019	0.443	0.742	5.0204e-38	0	Ccdc88a
Cd59	4.7877e-41	0.653242	0.653	0.362	5.41011e-38	0	Cd59
Nudt4	3.55793e-40	1.28873	0.902	0.889	4.02046e-37	0	Nudt4
Zfp462	6.91505e-40	1.13892	0.566	0.385	7.81401e-37	0	Zfp462
Map1b	1.52739e-39	-0.960448	0.555	0.846	1.72595e-36	0	Map1b
Gadd45g	1.73881e-39	0.569395	0.6	0.441	1.96485e-36	0	Gadd45g
Map1a	3.54093e-39	-1.19308	0.508	0.812	4.00126e-36	0	Map1a
Eif1b	7.48668e-39	-1.30562	0.83	0.932	8.45994e-36	0	Eif1b
Mmd2	9.80008e-39	-0.760596	0.462	0.783	1.10741e-35	0	Mmd2
Mcam	2.48862e-38	-1.11924	0.385	0.645	2.81214e-35	0	Mcam
Cyp51	3.00614e-38	-2.33042	0.574	0.728	3.39694e-35	0	Cyp51
Ca3	3.30532e-38	0.730182	0.475	0.21	3.73501e-35	0	Ca3
Fgfr2	3.49434e-38	-1.00284	0.185	0.562	3.94861e-35	0	Fgfr2
Pth1r	5.32684e-38	-1.79428	0.294	0.66	6.01933e-35	0	Pth1r
Map7	7.48535e-38	-1.16807	0.481	0.788	8.45844e-35	0	Map7
Tspan15	9.41867e-38	-0.790134	0.281	0.653	1.06431e-34	0	Tspan15
ENSRNOG00000050647	2.52793e-37	0.975816	0.875	0.826	2.85656e-34	0	ENSRNOG00000050647
Gria2	2.59078e-37	-0.55007	0.264	0.603	2.92758e-34	0	Gria2
Bcan	3.0615e-37	-0.767574	0.113	0.528	3.45949e-34	0	Bcan
Dnah6	3.45331e-37	1.59968	0.606	0.494	3.90224e-34	0	Dnah6
Gfap	2.0014e-36	-0.273202	0.202	0.615	2.26158e-33	0	Gfap
Nsg1	5.31332e-36	-0.284629	0.085	0.451	6.00405e-33	0	Nsg1
Sox8	5.88381e-36	-0.583195	0.351	0.697	6.64871e-33	0	Sox8
Ndufa4l2	1.08766e-35	-2.16232	0.157	0.421	1.22905e-32	0	Ndufa4l2
Trim2	1.31768e-35	-0.594019	0.425	0.819	1.48898e-32	0	Trim2
Cd63	3.56417e-35	-0.952749	0.955	0.987	4.02751e-32	0	Cd63
Col9a3	3.85535e-35	-0.659419	0.187	0.621	4.35655e-32	0	Col9a3
Cited2	8.70388e-35	0.954002	0.647	0.458	9.83538e-32	0	Cited2
Fam227a	8.88739e-35	1.49353	0.562	0.399	1.00428e-31	0	Fam227a
Sash1	2.94106e-34	-0.938798	0.417	0.692	3.32339e-31	0	Sash1
Gprc5b	5.99239e-34	-1.15358	0.391	0.674	6.7714e-31	0	Gprc5b
Fosb	1.22754e-33	0.54214	0.445	0.237	1.38712e-30	0	Fosb
Gsta6	1.44227e-33	-1.0622	0.262	0.674	1.62976e-30	0	Gsta6
Ahnak	2.42539e-33	0.768109	0.542	0.346	2.74069e-30	0	Ahnak
Arl4a	2.59967e-33	0.976393	0.77	0.698	2.93763e-30	0	Arl4a
AC128848.1	2.93022e-33	1.35252	0.589	0.42	3.31115e-30	0	AC128848.1
Sorl1	3.41527e-33	1.18866	0.557	0.381	3.85926e-30	0	Sorl1
Paqr6	3.79592e-33	-0.716835	0.474	0.766	4.28939e-30	0	Paqr6
Bcas1	5.98412e-33	-1.47489	0.381	0.682	6.76205e-30	0	Bcas1
Tenm3	1.46602e-32	0.913307	0.434	0.138	1.65661e-29	0	Tenm3
Insig1	1.47968e-32	-1.04819	0.521	0.774	1.67204e-29	0	Insig1
Agt	7.06244e-32	-1.63316	0.102	0.484	7.98056e-29	0	Agt
Rgs4	7.76237e-32	-1.99711	0.24	0.501	8.77147e-29	0	Rgs4
Fut9	1.08586e-31	-0.295602	0.111	0.517	1.22702e-28	0	Fut9
Erich3	1.34294e-31	1.25316	0.5	0.338	1.51753e-28	0	Erich3
Pex5l	1.37655e-31	-2.56078	0.538	0.726	1.5555e-28	0	Pex5l
Tgfb2	1.66695e-31	-0.311851	0.113	0.499	1.88366e-28	0	Tgfb2
Grm3	1.9688e-31	-1.35724	0.321	0.643	2.22474e-28	0	Grm3
Cfap77	2.064e-31	1.43595	0.562	0.395	2.33232e-28	0	Cfap77
Syt11	2.30882e-31	-1.19744	0.353	0.667	2.60896e-28	0	Syt11
Srd5a1	5.05039e-31	-0.889663	0.249	0.576	5.70694e-28	0	Srd5a1
Ybx3	1.13503e-30	-1.15083	0.489	0.727	1.28258e-27	0	Ybx3
Sorbs1	1.56444e-30	0.720193	0.502	0.309	1.76781e-27	0	Sorbs1
Fam13c	1.66438e-30	-0.895133	0.432	0.659	1.88075e-27	0	Fam13c
Gsn	1.67138e-30	-2.21333	0.277	0.641	1.88866e-27	0	Gsn
Pcdh18	2.35048e-30	-0.78277	0.075	0.429	2.65605e-27	0	Pcdh18
Rprm	3.88798e-30	0.983034	0.602	0.568	4.39342e-27	0	Rprm
Gucy1b1	7.24664e-30	-1.55523	0.321	0.617	8.1887e-27	0	Gucy1b1
Resp18	9.32382e-30	-0.887088	0.489	0.772	1.05359e-26	0	Resp18
Cox4i2	1.80213e-29	-3.29504	0.389	0.656	2.03641e-26	0	Cox4i2
Otud1	7.08092e-29	0.307111	0.453	0.3	8.00144e-26	0	Otud1
Mif	9.49969e-29	-0.578013	0.834	0.969	1.07347e-25	0	Mif
Sptbn1	1.08305e-28	-0.595026	0.413	0.768	1.22385e-25	0	Sptbn1
Slc6a20	1.29632e-28	-1.30979	0.277	0.626	1.46484e-25	0	Slc6a20
Cdkn2d	1.88537e-28	-0.465489	0.36	0.652	2.13047e-25	0	Cdkn2d
Ccdc34	2.63929e-28	1.18083	0.664	0.578	2.98239e-25	0	Ccdc34
G0s2	5.48779e-28	-1.43165	0.358	0.632	6.20121e-25	0	G0s2
Col1a2	5.53394e-28	-0.301439	0.417	0.265	6.25335e-25	0	Col1a2
Klf4	5.77492e-28	0.586802	0.585	0.481	6.52566e-25	0	Klf4
Rsph10b	9.93173e-28	1.31485	0.606	0.584	1.12229e-24	0	Rsph10b
Ifitm2	2.75179e-27	-2.13758	0.425	0.686	3.10953e-24	0	Ifitm2
Igsf11	4.77771e-27	-0.261617	0.36	0.756	5.39881e-24	0	Igsf11
Nr4a3	8.11039e-27	1.60071	0.587	0.566	9.16474e-24	0	Nr4a3
Ccn2	1.6046e-26	0.540043	0.338	0.204	1.8132e-23	0	Ccn2
Myrf	4.51034e-26	-0.919081	0.134	0.57	5.09669e-23	0	Myrf
Anln	7.97533e-26	-1.54138	0.315	0.566	9.01212e-23	0	Anln
Lpar1	8.16659e-26	-1.2835	0.394	0.628	9.22825e-23	0	Lpar1
Foxs1	1.31493e-25	-1.70588	0.321	0.594	1.48587e-22	0	Foxs1
Adpgk	1.35493e-25	-1.92693	0.328	0.639	1.53107e-22	0	Adpgk
Nfasc	1.38393e-25	-0.709536	0.334	0.668	1.56384e-22	0	Nfasc
Mal	3.6718e-25	-2.8509	0.528	0.634	4.14913e-22	0	Mal
Lxn	4.12343e-25	0.931204	0.647	0.642	4.65947e-22	0	Lxn
Cfap65	6.8514e-25	1.14383	0.532	0.45	7.74208e-22	0	Cfap65
Nkx6-1	7.72443e-25	1.00773	0.485	0.259	8.72861e-22	0	Nkx6-1
Nectin2	1.24567e-24	-0.718503	0.194	0.561	1.40761e-21	0	Nectin2
Mcm6	2.86513e-24	0.327747	0.468	0.401	3.23759e-21	0	Mcm6
Dusp15	5.01578e-24	-0.623997	0.072	0.524	5.66784e-21	0	Dusp15
Kif1a	5.14568e-24	-1.23647	0.389	0.625	5.81462e-21	0	Kif1a
Slc4a4	8.82302e-24	0.893789	0.555	0.455	9.97002e-21	0	Slc4a4
Serpinb6a	1.10307e-23	0.399049	0.579	0.428	1.24647e-20	0	Serpinb6a
Myof	2.2045e-23	-0.549124	0.104	0.458	2.49108e-20	0	Myof
Dnah7	2.37946e-23	1.12691	0.47	0.293	2.68879e-20	0	Dnah7
Chst2	3.81608e-23	-0.682876	0.411	0.692	4.31217e-20	0	Chst2
RT1-Ba	1.08178e-22	0.289959	0.328	0.216	1.22241e-19	0	RT1-Ba
Dmd	1.71528e-22	1.0586	0.545	0.445	1.93826e-19	0	Dmd
Col6a1	2.91542e-22	-1.44526	0.158	0.432	3.29443e-19	0	Col6a1
Eml1	3.05347e-22	-1.1738	0.36	0.636	3.45042e-19	0	Eml1
Lrrc4b	8.17019e-22	-0.311983	0.36	0.699	9.23232e-19	0	Lrrc4b
Col11a1	1.01738e-21	0.735601	0.406	0.23	1.14964e-18	0	Col11a1
Atp1a2	1.04621e-21	-2.56581	0.285	0.564	1.18222e-18	0	Atp1a2
Lama2	1.61054e-21	-0.436188	0.196	0.533	1.81991e-18	0	Lama2
Ppp2r2c	1.7568e-21	-0.829241	0.066	0.51	1.98518e-18	0	Ppp2r2c
Serpine2	2.40421e-21	-0.948795	0.24	0.563	2.71675e-18	0	Serpine2
Dut	2.5499e-21	0.659537	0.608	0.545	2.88139e-18	0	Dut
Sema6d	2.5825e-21	-0.752279	0.304	0.59	2.91823e-18	0	Sema6d
Dnah3	2.63583e-21	1.02518	0.43	0.275	2.97849e-18	0	Dnah3
Ndrg1	2.77923e-21	-1.44009	0.285	0.6	3.14053e-18	0	Ndrg1
Cald1	3.55831e-21	-3.17189	0.409	0.62	4.02089e-18	0	Cald1
Apol3	5.29554e-21	-0.564535	0.066	0.415	5.98396e-18	0	Apol3
Stk39	8.00396e-21	-0.851776	0.579	0.719	9.04447e-18	0	Stk39
ENSRNOG00000039496	1.13597e-20	0.251294	0.313	0.129	1.28364e-17	0	ENSRNOG00000039496
Plekhb1	1.82635e-20	-0.996996	0.594	0.796	2.06378e-17	0	Plekhb1
Kif21a	4.09296e-20	-0.398176	0.451	0.784	4.62504e-17	0	Kif21a
Agrn	4.56816e-20	-0.624362	0.132	0.423	5.16202e-17	0	Agrn
Ank3	6.98024e-20	-0.960935	0.351	0.579	7.88767e-17	0	Ank3
Fcgr3a	1.05087e-19	0.725786	0.625	0.598	1.18749e-16	0	Fcgr3a
Zap70	1.51059e-19	-0.913219	0.283	0.514	1.70697e-16	0	Zap70
Sod2	1.72035e-19	-0.541123	0.528	0.802	1.944e-16	0	Sod2
Ank2	3.26167e-19	-0.822938	0.506	0.72	3.68569e-16	0	Ank2
Dnai3	4.78873e-19	1.33475	0.557	0.536	5.41126e-16	0	Dnai3
Pebp1	1.30452e-18	-0.4719	0.911	0.976	1.47411e-15	0	Pebp1
Ifitm6	1.39858e-18	0.481843	0.472	0.423	1.5804e-15	0	Ifitm6
Gpr37l1	1.88572e-18	-0.766236	0.217	0.497	2.13086e-15	0	Gpr37l1
Gadd45b	2.36765e-18	-0.608959	0.242	0.57	2.67544e-15	0	Gadd45b
Plk2	2.5762e-18	0.445057	0.44	0.358	2.9111e-15	0	Plk2
Fhad1	2.90985e-18	1.24467	0.515	0.435	3.28813e-15	0	Fhad1
Gucy1a1	4.24295e-18	-1.24481	0.287	0.549	4.79453e-15	0	Gucy1a1
Sox4	5.45319e-18	0.76683	0.715	0.669	6.1621e-15	0	Sox4
H1f0	7.12239e-18	-0.535274	0.309	0.648	8.04831e-15	0	H1f0
Lyz2	8.2357e-18	1.09909	0.672	0.64	9.30634e-15	0	Lyz2
Pgm5	8.71427e-18	0.705036	0.389	0.224	9.84712e-15	0	Pgm5
Metrn	1.08827e-17	0.76851	0.664	0.646	1.22974e-14	0	Metrn
Cnn3	1.26878e-17	0.737192	0.768	0.816	1.43372e-14	0	Cnn3
Mapk8ip1	2.06817e-17	-0.649952	0.413	0.662	2.33703e-14	0	Mapk8ip1
Dab2	2.21921e-17	-0.366702	0.121	0.416	2.50771e-14	0	Dab2
Cdkl4	2.50059e-17	1.26423	0.54	0.486	2.82567e-14	0	Cdkl4
Thra	2.6379e-17	-0.453624	0.687	0.871	2.98083e-14	0	Thra
Dbi	3.03386e-17	0.823909	0.953	0.881	3.42826e-14	0	Dbi
Pygm	5.89273e-17	-0.536354	0.313	0.587	6.65878e-14	0	Pygm
Npdc1	6.02728e-17	-0.628976	0.223	0.563	6.81083e-14	0	Npdc1
Timp1	9.83233e-17	-0.496552	0.155	0.467	1.11105e-13	0	Timp1
Dact3	1.48271e-16	-0.640237	0.051	0.487	1.67546e-13	0	Dact3
Mgp	1.77347e-16	-3.80946	0.321	0.571	2.00402e-13	0	Mgp
Hmgn2	2.69287e-16	0.629503	0.813	0.734	3.04294e-13	0	Hmgn2
Sh3glb2	6.57027e-16	-0.79117	0.285	0.587	7.4244e-13	0	Sh3glb2
Schip1	6.96302e-16	-0.732286	0.557	0.706	7.86821e-13	0	Schip1
Sub1	7.96613e-16	-0.372179	0.772	0.929	9.00173e-13	0	Sub1
Hapln2	8.72529e-16	-2.48361	0.502	0.618	9.85958e-13	0	Hapln2
Tagln2	4.735e-15	-0.305422	0.768	0.456	5.35055e-12	0	Tagln2
Ier3	9.79638e-15	0.773453	0.832	0.873	1.10699e-11	0	Ier3
Apcdd1	1.21666e-14	-0.329253	0.157	0.467	1.37482e-11	0	Apcdd1
ENSRNOG00000065062	1.33543e-14	0.716679	0.523	0.57	1.50904e-11	0	ENSRNOG00000065062
Arl6ip1	1.42136e-14	-0.439143	0.891	0.959	1.60613e-11	0	Arl6ip1
Cxcr4	2.33606e-14	0.763619	0.411	0.291	2.63975e-11	0	Cxcr4
NEWGENE-1310680	2.83105e-14	-0.540233	0.058	0.45	3.19909e-11	0	NEWGENE-1310680
Anxa1	3.21371e-14	0.788815	0.392	0.331	3.63149e-11	0	Anxa1
Ankrd28	5.66734e-14	-0.597192	0.449	0.657	6.40409e-11	0	Ankrd28
Kcnj10	6.06704e-14	-0.458654	0.491	0.746	6.85576e-11	0	Kcnj10
Atp9a	6.65248e-14	-0.407017	0.328	0.575	7.5173e-11	0	Atp9a
Map3k7cl	6.99455e-14	-0.943979	0.251	0.465	7.90385e-11	0	Map3k7cl
Lgals3	1.40784e-13	0.371391	0.477	0.361	1.59086e-10	0	Lgals3
Enpp6	1.47135e-13	-0.582744	0.077	0.423	1.66263e-10	0	Enpp6
Myo1d	1.86435e-13	-0.686349	0.228	0.535	2.10671e-10	0	Myo1d
ENSRNOG00000032922	2.13732e-13	0.516911	0.691	0.655	2.41517e-10	0	ENSRNOG00000032922
Smpdl3a	2.67401e-13	0.542261	0.575	0.509	3.02163e-10	0	Smpdl3a
Tpx2	3.74533e-13	0.308665	0.404	0.388	4.23223e-10	0	Tpx2
ENSRNOG00000062927	4.45191e-13	-0.448934	0.609	0.803	5.03066e-10	0	ENSRNOG00000062927
RT1-Bb	8.73874e-13	0.337907	0.43	0.435	9.87478e-10	0	RT1-Bb
H1f2	1.28615e-12	-0.621912	0.536	0.748	1.45335e-09	0	H1f2
Pcdh17	1.45055e-12	-0.443309	0.094	0.406	1.63912e-09	0	Pcdh17
Hspb1	2.64994e-12	0.497437	0.581	0.492	2.99443e-09	0	Hspb1
Abhd3	3.2547e-12	0.622387	0.719	0.754	3.67781e-09	0	Abhd3
ENSRNOG00000070586	3.92e-12	-0.764952	0.37	0.558	4.4296e-09	0	ENSRNOG00000070586
Prnp	5.77949e-12	0.456736	0.849	0.819	6.53082e-09	0	Prnp
Aurkb	6.58562e-12	0.537826	0.291	0.163	7.44175e-09	0	Aurkb
Dnah5	6.63831e-12	1.21411	0.538	0.626	7.50129e-09	0	Dnah5
Cdkn1c	7.23645e-12	-0.8119	0.445	0.549	8.17719e-09	0	Cdkn1c
Psat1	8.79566e-12	-0.876928	0.685	0.783	9.9391e-09	0	Psat1
Thy1	1.08944e-11	-0.259142	0.426	0.382	1.23106e-08	0	Thy1
Scd2	1.16535e-11	-1.06579	0.909	0.852	1.31684e-08	0	Scd2
Clip3	1.24396e-11	-0.294528	0.311	0.586	1.40568e-08	0	Clip3
Prdx5	1.76903e-11	0.51154	0.768	0.755	1.999e-08	0	Prdx5
Clic4	2.60767e-11	-0.395274	0.398	0.684	2.94666e-08	0	Clic4
Plppr5	3.28607e-11	-0.28942	0.321	0.51	3.71326e-08	0	Plppr5
Nkain2	3.9015e-11	-0.83204	0.366	0.53	4.4087e-08	0	Nkain2
Rasgrp2	4.39504e-11	-0.487251	0.209	0.486	4.96639e-08	0	Rasgrp2
Ppdpf	4.39949e-11	-0.37319	0.74	0.881	4.97142e-08	0	Ppdpf
Atad2	4.61565e-11	0.517794	0.53	0.492	5.21568e-08	0	Atad2
Mfsd2a	5.1371e-11	-0.473734	0.34	0.568	5.80492e-08	0	Mfsd2a
Nckap1	5.49222e-11	-0.300651	0.409	0.683	6.20621e-08	0	Nckap1
Ifitm3	5.59074e-11	-0.838449	0.766	0.514	6.31754e-08	0	Ifitm3
Nedd4	6.24553e-11	-0.412417	0.753	0.932	7.05745e-08	0	Nedd4
Bank1	9.69065e-11	0.327681	0.317	0.232	1.09504e-07	0	Bank1
Adgrv1	1.01546e-10	-0.463273	0.562	0.789	1.14747e-07	0	Adgrv1
Cxcl16	1.1388e-10	0.318821	0.342	0.235	1.28684e-07	0	Cxcl16
Rgs1	2.25302e-10	0.554406	0.585	0.587	2.54591e-07	0	Rgs1
Sqle	2.57191e-10	-0.694213	0.817	0.915	2.90626e-07	0	Sqle
Cxcl2	3.49982e-10	0.457756	0.323	0.58	3.9548e-07	0	Cxcl2
Apoe	3.7496e-10	-2.17553	0.853	0.923	4.23705e-07	0	Apoe
Mafb	4.98477e-10	0.365767	0.455	0.649	5.63279e-07	0	Mafb
Sgcb	5.26083e-10	0.411445	0.645	0.608	5.94474e-07	0	Sgcb
S100a10	1.53562e-09	0.465154	0.502	0.485	1.73525e-06	0	S100a10
H2az1	2.1271e-09	0.45904	0.851	0.844	2.40362e-06	0	H2az1
RT1-Db1	2.82428e-09	0.669778	0.46	0.429	3.19143e-06	0	RT1-Db1
Phlda3	2.83075e-09	-0.258881	0.349	0.303	3.19875e-06	0	Phlda3
Agpat4	2.96956e-09	-1.09153	0.655	0.661	3.3556e-06	0	Agpat4
AABR07073181.1	7.73581e-09	-0.32072	0.032	0.319	8.74147e-06	0	AABR07073181.1
Pfn2	1.06877e-08	-0.502716	0.449	0.626	1.20771e-05	0	Pfn2
Hsd11b1	1.22605e-08	-1.05636	0.33	0.53	1.38543e-05	0	Hsd11b1
S100a16	1.22912e-08	-0.517258	0.711	0.855	1.3889e-05	0	S100a16
Foxd1	1.25271e-08	-0.994758	0.266	0.459	1.41556e-05	0	Foxd1
RT1-Da	1.71329e-08	0.634482	0.308	0.312	1.93601e-05	0	RT1-Da
Clec18a	2.08529e-08	0.837401	0.374	0.277	2.35638e-05	0	Clec18a
Rrad	2.36728e-08	-1.72682	0.268	0.497	2.67502e-05	0	Rrad
Serinc5	4.37074e-08	-0.788343	0.479	0.605	4.93894e-05	0	Serinc5
Adgrl3	5.22694e-08	-0.434084	0.387	0.601	5.90644e-05	0	Adgrl3
ENSRNOG00000019926	7.91419e-08	-0.759803	0.474	0.681	8.94304e-05	0	ENSRNOG00000019926
Lgals1	8.60742e-08	-1.62388	0.374	0.522	9.72639e-05	0	Lgals1
Atp1b2	1.63651e-07	-1.51322	0.419	0.547	0.000184926	0	Atp1b2
C4a	3.47221e-07	0.583552	0.509	0.738	0.000392359	0	C4a
Pdgfrb	3.83304e-07	-1.8595	0.308	0.51	0.000433133	0	Pdgfrb
Ddit4	4.36136e-07	0.338353	0.711	0.678	0.000492833	0	Ddit4
Actn1	4.49775e-07	0.571033	0.477	0.478	0.000508246	0	Actn1
ENSRNOG00000069624	4.91695e-07	0.310751	0.517	0.676	0.000555615	0	ENSRNOG00000069624
Dnah11	6.8381e-07	1.16077	0.494	0.565	0.000772706	0	Dnah11
Aldoc	8.65225e-07	-0.567971	0.634	0.861	0.000977704	0	Aldoc
Hmgb2l1.1	8.99939e-07	0.451432	0.549	0.565	0.00101693	0	Hmgb2l1.1
Hist1h2bq	1.27058e-06	-0.563642	0.747	0.804	0.00143576	0	Hist1h2bq
Fdft1	1.91598e-06	-0.763207	0.57	0.627	0.00216506	0	Fdft1
Pou3f1	1.94396e-06	-0.398404	0.047	0.328	0.00219667	0	Pou3f1
C1qtnf5	2.37049e-06	-1.05619	0.468	0.605	0.00267866	0	C1qtnf5
Kitlg	2.98781e-06	0.791848	0.451	0.453	0.00337622	0	Kitlg
Ncam1	3.94651e-06	-0.291713	0.709	0.851	0.00445956	0	Ncam1
Slc5a11	5.29828e-06	-0.323997	0.445	0.57	0.00598706	0	Slc5a11
Lrrn1	6.20009e-06	-0.723375	0.464	0.538	0.0070061	0	Lrrn1
Filip1l	6.94674e-06	-1.80088	0.277	0.444	0.00784982	0	Filip1l
Ccn1	1.10357e-05	1.01191	0.409	0.396	0.0124704	0	Ccn1
Smim5	1.4729e-05	-0.28892	0.064	0.373	0.0166437	0	Smim5
Serpinh1	7.93803e-05	-0.875891	0.43	0.512	0.0896998	0	Serpinh1
Hmgb2l1	8.03592e-05	0.403218	0.483	0.522	0.0908059	0	Hmgb2l1
ENSRNOG00000028822	9.17283e-05	0.398637	0.677	0.707	0.103653	0	ENSRNOG00000028822
Cd83	9.7851e-05	0.32127	0.587	0.692	0.110572	0	Cd83
Lig1	0.000111855	0.36763	0.474	0.477	0.126396	0	Lig1
Colec12	0.000114817	-0.407888	0.266	0.358	0.129744	0	Colec12
Tril	0.000121709	-0.728517	0.445	0.427	0.137531	0	Tril
Vegfa	0.000123558	-0.315807	0.443	0.474	0.139621	0	Vegfa
Tm4sf1	0.000123625	-1.44696	0.377	0.5	0.139696	0	Tm4sf1
RGD1564664	0.000178717	-2.13824	0.313	0.486	0.201951	0	RGD1564664
Rbpj	0.000216849	0.422506	0.626	0.706	0.245039	0	Rbpj
ENSRNOG00000006030	0.000219228	-0.942438	0.585	0.675	0.247727	0	ENSRNOG00000006030
S1pr3	0.000337454	0.259234	0.347	0.558	0.381323	0	S1pr3
Lgi3	0.000361322	-0.320174	0.498	0.666	0.408294	0	Lgi3
Atf3	0.000584418	0.715365	0.6	0.669	0.660392	0	Atf3
Art3	0.000841088	-1.27273	0.191	0.403	0.950429	0	Art3
Fstl1	0.00139391	-1.2468	0.309	0.424	1	0	Fstl1
Maob	0.00151977	0.706416	0.383	0.345	1	0	Maob
Dnaaf2	0.00199116	0.265022	0.317	0.498	1	0	Dnaaf2
Ckap4	0.00217685	0.314598	0.36	0.385	1	0	Ckap4
Id3	0.00242382	-0.679795	0.338	0.52	1	0	Id3
Tubb3	0.00248459	-0.404384	0.275	0.451	1	0	Tubb3
Anp32e	0.00254447	0.305079	0.494	0.575	1	0	Anp32e
Vwa1	0.0036351	-0.32594	0.07	0.371	1	0	Vwa1
Ccnd1	0.00364536	-1.30525	0.492	0.605	1	0	Ccnd1
Ebf1	0.00369346	-1.78175	0.438	0.512	1	0	Ebf1
Cd74	0.00379628	0.79401	0.515	0.592	1	0	Cd74
Fcgrt	0.00381894	-0.498787	0.451	0.575	1	0	Fcgrt
Rgs2	0.00593188	0.61293	0.494	0.707	1	0	Rgs2
Fxyd1	0.00760543	-0.747366	0.402	0.501	1	0	Fxyd1
Aplp1.1	9.54978e-205	4.91948	1	0.504	1.07913e-201	1	Aplp1
Stmn4.1	1.70394e-203	3.89152	1	0.618	1.92545e-200	1	Stmn4
Mag.1	8.88247e-203	3.90862	1	0.584	1.00372e-199	1	Mag
Ermn.1	9.02731e-203	4.36175	0.998	0.621	1.02009e-199	1	Ermn
Mog.1	1.17491e-202	3.75688	0.996	0.535	1.32765e-199	1	Mog
Cfap20dc.1	5.95341e-202	3.71906	0.998	0.535	6.72735e-199	1	Cfap20dc
Plp1.1	3.19192e-201	5.29715	1	0.797	3.60687e-198	1	Plp1
Qdpr.1	6.28854e-201	4.78141	0.996	0.356	7.10605e-198	1	Qdpr
Spock3.1	6.30398e-201	3.01137	0.991	0.521	7.12349e-198	1	Spock3
Tubb4a.1	2.45886e-200	4.62828	1	0.624	2.77851e-197	1	Tubb4a
Pex5l.1	2.73358e-200	3.52157	1	0.481	3.08894e-197	1	Pex5l
Mobp.1	4.42377e-200	3.44295	0.998	0.531	4.99886e-197	1	Mobp
Ptgds.1	5.87106e-200	4.64459	1	0.653	6.6343e-197	1	Ptgds
Ttll7.1	6.40032e-200	3.06336	1	0.618	7.23236e-197	1	Ttll7
Tf.1	5.41421e-199	4.42915	1	0.741	6.11805e-196	1	Tf
Ugt8.1	7.60268e-199	3.67431	0.998	0.602	8.59103e-196	1	Ugt8
Stmn1.1	9.115e-199	4.44465	0.998	0.653	1.02999e-195	1	Stmn1
Edil3.1	1.66149e-198	3.65167	0.998	0.608	1.87748e-195	1	Edil3
Cnp.1	3.54313e-198	4.17762	1	0.661	4.00374e-195	1	Cnp
Opalin.1	5.61821e-198	3.54061	0.996	0.618	6.34858e-195	1	Opalin
Enpp2.1	1.5366e-197	3.04544	0.998	0.362	1.73636e-194	1	Enpp2
Mbp.1	1.5703e-197	4.00661	1	0.565	1.77444e-194	1	Mbp
Hapln2.1	1.82569e-197	3.36371	0.989	0.365	2.06303e-194	1	Hapln2
Cldn11.1	1.14093e-196	3.91328	0.998	0.599	1.28925e-193	1	Cldn11
Rtn4.1	2.65673e-196	2.60527	1	0.71	3.00211e-193	1	Rtn4
Rhou.1	1.20598e-195	2.2774	0.991	0.491	1.36276e-192	1	Rhou
Apod.1	1.78264e-195	4.91935	0.994	0.718	2.01439e-192	1	Apod
Tmem125.1.1	1.49062e-194	2.68612	0.983	0.512	1.6844e-191	1	Tmem125.1
Slain1.1	1.49968e-194	2.67102	0.991	0.548	1.69464e-191	1	Slain1
Mal.1	3.308e-194	3.97601	0.996	0.392	3.73804e-191	1	Mal
Gjb1.1	1.56913e-193	3.27551	0.987	0.529	1.77312e-190	1	Gjb1
Kcna1.1	3.1994e-193	3.06046	0.994	0.53	3.61533e-190	1	Kcna1
Gjc2.1	7.05934e-193	2.61527	0.985	0.512	7.97705e-190	1	Gjc2
Cdc42ep2.1	1.28618e-192	2.28082	0.985	0.284	1.45339e-189	1	Cdc42ep2
Gsn.1	5.44763e-192	2.88305	0.989	0.258	6.15582e-189	1	Gsn
Glul.1	1.45841e-191	3.44024	0.998	0.72	1.64801e-188	1	Glul
Sec11c.1	2.32061e-191	3.73765	1	0.818	2.62229e-188	1	Sec11c
Ywhaq.1	2.56318e-191	2.76085	0.998	0.741	2.8964e-188	1	Ywhaq
Ninj2.1	1.361e-190	2.664	0.983	0.563	1.53793e-187	1	Ninj2
Ube2d1.1	3.65056e-186	2.53681	0.996	0.645	4.12513e-183	1	Ube2d1
Fa2h.1	7.91108e-185	2.28207	0.972	0.471	8.93952e-182	1	Fa2h
Gpr37.1	3.1816e-184	2.42767	0.985	0.557	3.59521e-181	1	Gpr37
Cmtm5.1	1.6308e-183	2.80847	0.994	0.615	1.84281e-180	1	Cmtm5
Selenop.1	3.52176e-183	2.78267	0.994	0.734	3.97959e-180	1	Selenop
Nkx6-2.1	3.75316e-183	2.82043	0.972	0.529	4.24107e-180	1	Nkx6-2
App.1	3.76621e-183	2.16974	1	0.824	4.25581e-180	1	App
Cryab.1	1.73346e-180	4.32071	0.981	0.572	1.95881e-177	1	Cryab
Secisbp2l.1	6.46428e-180	2.51674	0.998	0.637	7.30464e-177	1	Secisbp2l
Gpm6b.1	6.22824e-178	2.40912	1	0.586	7.03791e-175	1	Gpm6b
Pllp.1	3.83194e-177	3.09717	0.994	0.538	4.33009e-174	1	Pllp
Slc44a1.1	1.28387e-175	2.36467	0.996	0.417	1.45077e-172	1	Slc44a1
Josd2.1	5.31621e-175	2.35765	0.994	0.678	6.00732e-172	1	Josd2
Nipa1.1	4.17384e-173	2.08363	0.994	0.548	4.71644e-170	1	Nipa1
Gjc3.1	8.24078e-172	2.32746	0.963	0.397	9.31208e-169	1	Gjc3
Lpar1.1	1.94852e-170	2.12365	0.978	0.319	2.20183e-167	1	Lpar1
Tspan2.1	5.76345e-170	2.83951	0.976	0.572	6.5127e-167	1	Tspan2
Dbndd2.1	6.91833e-169	2.25794	0.994	0.786	7.81771e-166	1	Dbndd2
Grm3.1	7.46248e-169	1.93626	0.946	0.307	8.4326e-166	1	Grm3
Plekhh1.1	8.25143e-168	2.07221	0.957	0.505	9.32411e-165	1	Plekhh1
Cyp51.1	5.97873e-167	2.69157	0.996	0.506	6.75596e-164	1	Cyp51
Ncam2.1	8.41329e-166	2.04816	0.976	0.502	9.50701e-163	1	Ncam2
Anln.1	5.49237e-165	2.22501	0.903	0.254	6.20637e-162	1	Anln
Ndrg1.1	3.39295e-164	2.17366	0.942	0.249	3.83404e-161	1	Ndrg1
Omg.1	2.06488e-163	2.03608	0.97	0.608	2.33331e-160	1	Omg
Tecr.1	3.17312e-162	2.06692	1	0.869	3.58563e-159	1	Tecr
Map1a.1	3.64974e-162	2.05156	0.991	0.548	4.12421e-159	1	Map1a
Shisa4.1	6.8113e-162	2.09159	0.989	0.545	7.69677e-159	1	Shisa4
S1pr5.1	9.36405e-162	1.88461	0.933	0.548	1.05814e-158	1	S1pr5
Agpat4.1	1.90127e-160	2.07409	0.991	0.492	2.14843e-157	1	Agpat4
Eml1.1	4.71175e-159	1.98783	0.955	0.319	5.32428e-156	1	Eml1
Rab33a.1	5.72848e-159	1.81296	0.935	0.545	6.47318e-156	1	Rab33a
Fnbp1.1	1.12328e-158	2.0803	0.976	0.4	1.26931e-155	1	Fnbp1
Septin8.1	2.0795e-158	2.09529	0.976	0.458	2.34984e-155	1	Septin8
Srd5a1.1	2.99441e-158	1.50112	0.931	0.211	3.38369e-155	1	Srd5a1
Wscd1.1	8.30696e-158	1.90767	0.965	0.427	9.38686e-155	1	Wscd1
Carhsp1.1	1.3743e-157	1.96164	0.976	0.464	1.55296e-154	1	Carhsp1
Slc48a1.1	4.57338e-156	1.98223	0.978	0.521	5.16792e-153	1	Slc48a1
Tmeff2.1	6.3076e-155	1.67391	0.918	0.498	7.12758e-152	1	Tmeff2
Septin7.1	8.25651e-154	1.97588	1	0.906	9.32986e-151	1	Septin7
Mapt.1	1.40998e-153	1.94493	0.987	0.529	1.59328e-150	1	Mapt
Sirt2.1	1.63281e-153	1.5829	0.991	0.595	1.84507e-150	1	Sirt2
Anks1b.1	6.02813e-153	1.8164	0.95	0.57	6.81179e-150	1	Anks1b
Gsta6.1	1.39431e-152	1.64188	0.946	0.302	1.57557e-149	1	Gsta6
Hs3st1.1	1.62433e-152	2.0449	0.965	0.348	1.8355e-149	1	Hs3st1
Apbb1.1	2.23511e-152	1.74724	0.955	0.279	2.52567e-149	1	Apbb1
Klk6.1	3.6895e-152	3.4555	0.898	0.369	4.16913e-149	1	Klk6
Pcdh9.1	8.08597e-152	1.78821	0.95	0.505	9.13714e-149	1	Pcdh9
Psat1.1	9.22283e-152	1.91677	0.981	0.628	1.04218e-148	1	Psat1
Hmgcs1.1	4.04422e-151	2.56709	0.987	0.47	4.56997e-148	1	Hmgcs1
Elavl3.1	8.01857e-150	1.68401	0.929	0.544	9.06099e-147	1	Elavl3
Slc12a2.1	2.20968e-149	2.17118	0.996	0.596	2.49694e-146	1	Slc12a2
Ca14.1	3.08377e-149	1.82013	0.929	0.521	3.48466e-146	1	Ca14
Mettl7a.1	5.92961e-149	1.93131	0.989	0.6	6.70046e-146	1	Mettl7a
Abca2.1	9.15991e-149	1.73918	0.95	0.349	1.03507e-145	1	Abca2
Kif1a.1	1.55678e-148	1.65242	0.94	0.332	1.75917e-145	1	Kif1a
Ank3.1	6.08682e-148	1.50289	0.905	0.285	6.87811e-145	1	Ank3
Olig1.1	8.73394e-148	1.54094	0.981	0.549	9.86935e-145	1	Olig1
Ptprd.1	1.60611e-147	1.86927	0.987	0.631	1.81491e-144	1	Ptprd
Scd2.1	1.80035e-147	2.0962	0.998	0.812	2.0344e-144	1	Scd2
Syt11.1	2.3893e-147	1.66193	0.968	0.336	2.69991e-144	1	Syt11
Ldlrap1.1	3.58606e-147	1.52595	0.924	0.357	4.05225e-144	1	Ldlrap1
Hcn2.1	5.61441e-147	2.29559	0.896	0.519	6.34429e-144	1	Hcn2
Ppp2r2c.1	7.38964e-147	1.25213	0.829	0.096	8.35029e-144	1	Ppp2r2c
Gprc5b.1	4.59275e-146	1.74484	0.974	0.361	5.1898e-143	1	Gprc5b
Gnai1.1	9.24639e-146	1.46693	0.911	0.47	1.04484e-142	1	Gnai1
Gng8.1	6.96496e-145	1.83122	0.935	0.45	7.87041e-142	1	Gng8
Fgfr2.1	8.65552e-145	1.53178	0.901	0.176	9.78074e-142	1	Fgfr2
Csrp1.1	1.14763e-144	1.73864	0.95	0.484	1.29683e-141	1	Csrp1
Faim2.1	1.47293e-144	1.67344	0.924	0.48	1.66442e-141	1	Faim2
Cadm4.1	1.57315e-144	1.61726	0.965	0.337	1.77766e-141	1	Cadm4
Luzp2.1	1.24375e-139	1.74698	0.963	0.551	1.40544e-136	1	Luzp2
Scrg1.1	6.69119e-139	1.48925	0.946	0.523	7.56104e-136	1	Scrg1
Tmeff1.1	1.56371e-138	1.55941	0.896	0.468	1.767e-135	1	Tmeff1
Msmo1.1	5.52773e-138	1.78207	0.978	0.589	6.24634e-135	1	Msmo1
Ppp1r14a.1	5.89845e-138	1.82338	0.95	0.442	6.66525e-135	1	Ppp1r14a
Map7.1	1.33274e-137	1.74562	0.927	0.543	1.506e-134	1	Map7
ENSRNOG00000070586.1	4.92692e-137	1.31011	0.875	0.292	5.56742e-134	1	ENSRNOG00000070586
Elapor2.1	2.90735e-136	1.17962	0.877	0.396	3.2853e-133	1	Elapor2
Tagln2.1	1.20654e-135	-2.93937	0.125	0.8	1.36339e-132	1	Tagln2
Ank2.1	3.26562e-134	1.62618	0.97	0.472	3.69015e-131	1	Ank2
Eif1b.1	2.5965e-133	1.90143	0.989	0.845	2.93404e-130	1	Eif1b
Myrf.1	6.16543e-133	1.31687	0.842	0.184	6.96694e-130	1	Myrf
Cavin3.1	2.87222e-131	-1.77018	0.039	0.738	3.24561e-128	1	Cavin3
Cfap126.1	5.05369e-131	-2.53156	0.095	0.785	5.71067e-128	1	Cfap126
Nkd1.1	1.06364e-128	1.25765	0.886	0.303	1.20192e-125	1	Nkd1
NEWGENE-1310680.1	2.2086e-128	0.890099	0.767	0.067	2.49571e-125	1	NEWGENE-1310680
Schip1.1	2.67152e-128	1.4979	0.985	0.481	3.01882e-125	1	Schip1
Gnao1.1	2.59722e-127	1.41472	0.959	0.609	2.93486e-124	1	Gnao1
Insig1.1	7.21152e-127	1.53181	0.955	0.538	8.14901e-124	1	Insig1
Hmgn3.1	7.54759e-127	1.46027	0.974	0.599	8.52877e-124	1	Hmgn3
Plekhb1.1	1.64507e-126	1.83145	0.944	0.606	1.85893e-123	1	Plekhb1
Kcnj8	1.95646e-125	-2.62467	0.015	0.541	2.2108e-122	1	Kcnj8
Ano4.1	4.68408e-125	1.22758	0.911	0.434	5.29301e-122	1	Ano4
Bcas1.1	4.73167e-125	1.30396	0.933	0.384	5.34678e-122	1	Bcas1
Adpgk.1	5.57201e-125	2.76628	0.873	0.344	6.29637e-122	1	Adpgk
Dnm3.1	3.85438e-124	1.28932	0.896	0.309	4.35545e-121	1	Dnm3
Idi1.1	3.1943e-123	1.80439	0.983	0.656	3.60956e-120	1	Idi1
Car2.1	9.1233e-123	2.51081	0.914	0.612	1.03093e-119	1	Car2
Dusp15.1	1.87091e-122	0.894505	0.784	0.135	2.11413e-119	1	Dusp15
Pmp22.1	4.37841e-122	1.88189	0.981	0.622	4.94761e-119	1	Pmp22
Tmem88b.1	4.91328e-122	1.24669	0.847	0.476	5.552e-119	1	Tmem88b
Fez1	5.42971e-122	1.52097	1	0.863	6.13557e-119	1	Fez1
Ifitm3.1	3.51185e-119	-3.88823	0.248	0.791	3.96839e-116	1	Ifitm3
Nkain2.1	3.35175e-118	1.27081	0.836	0.283	3.78748e-115	1	Nkain2
Rusc1.1	5.17556e-116	1.5463	0.989	0.691	5.84838e-113	1	Rusc1
Gal3st1.1	5.44183e-116	1.06254	0.857	0.392	6.14927e-113	1	Gal3st1
Akap12	5.47394e-116	-1.32868	0.073	0.603	6.18555e-113	1	Akap12
Septin4.1	1.63012e-115	1.72791	0.991	0.723	1.84204e-112	1	Septin4
Adgrv1.1	7.44851e-115	1.37872	0.955	0.576	8.41681e-112	1	Adgrv1
Map1b.1	7.18154e-114	1.49937	0.959	0.623	8.11514e-111	1	Map1b
Pcbp4.1	1.70256e-113	1.3848	0.914	0.489	1.92389e-110	1	Pcbp4
Ybx3.1	1.08319e-112	1.5471	0.948	0.48	1.22401e-109	1	Ybx3
Ccdc88a.1	3.45297e-112	1.45879	0.965	0.459	3.90186e-109	1	Ccdc88a
Igfbp7	3.0086e-111	-5.31325	0.114	0.641	3.39972e-108	1	Igfbp7
Hist1h2bq.1	3.60209e-111	1.48909	0.994	0.677	4.07036e-108	1	Hist1h2bq
Dixdc1.1	1.9304e-110	1.19794	0.927	0.48	2.18135e-107	1	Dixdc1
Caly.1	2.5221e-110	-2.09475	0.276	0.787	2.84998e-107	1	Caly
Btbd3.1	9.70066e-110	1.23101	0.905	0.468	1.09617e-106	1	Btbd3
AABR07028488.1	4.93625e-109	-3.36679	0.289	0.773	5.57796e-106	1	AABR07028488.1
Larp6.1	2.16599e-108	1.19253	0.836	0.464	2.44757e-105	1	Larp6
AABR07017733.1.1	1.20648e-106	1.23565	0.832	0.471	1.36333e-103	1	AABR07017733.1
Dnah12.1	2.19475e-106	-2.5909	0.188	0.769	2.48006e-103	1	Dnah12
Pdgfa.1	1.29299e-105	1.26517	0.944	0.521	1.46108e-102	1	Pdgfa
Gstt3.1	3.81895e-105	1.36523	0.905	0.466	4.31541e-102	1	Gstt3
Cpm.1	6.62286e-105	0.857311	0.862	0.259	7.48383e-102	1	Cpm
ENSRNOG00000013320.1	1.70248e-103	-2.58511	0.376	0.792	1.9238e-100	1	ENSRNOG00000013320
S100a16.1	5.73956e-103	1.34223	0.961	0.72	6.4857e-100	1	S100a16
Serinc5.1	7.83765e-103	1.20556	0.901	0.385	8.85654e-100	1	Serinc5
Tmem200c.1	3.24723e-102	1.52343	0.84	0.51	3.66937e-99	1	Tmem200c
Bnip3.1	3.34951e-102	1.28924	0.963	0.613	3.78495e-99	1	Bnip3
Gja1.1	2.19643e-101	-2.82122	0.21	0.752	2.48196e-98	1	Gja1
Fam13c.1	3.3282e-101	1.06812	0.86	0.428	3.76086e-98	1	Fam13c
Sqle.1	1.21075e-100	1.46125	0.987	0.823	1.36815e-97	1	Sqle
Riiad1.1	1.74606e-100	-1.54817	0.076	0.697	1.97305e-97	1	Riiad1
Eid1.1	9.88734e-100	1.14702	0.996	0.879	1.11727e-96	1	Eid1
Trim2.1	3.22447e-99	1.31281	0.931	0.537	3.64366e-96	1	Trim2
Vim.1	2.20693e-98	-4.29202	0.348	0.802	2.49383e-95	1	Vim
Fdft1.1	7.54385e-98	1.30781	0.914	0.451	8.52456e-95	1	Fdft1
ENSRNOG00000043390.1	8.55446e-98	0.980248	0.838	0.501	9.66654e-95	1	ENSRNOG00000043390
Mapk8ip1.1	1.88765e-97	1.14649	0.909	0.396	2.13304e-94	1	Mapk8ip1
Plcl1.1	1.94826e-97	0.960016	0.927	0.506	2.20153e-94	1	Plcl1
Spef2.1	2.5375e-97	-1.49615	0.093	0.689	2.86738e-94	1	Spef2
Stk39.1	2.94164e-97	1.16099	0.952	0.522	3.32406e-94	1	Stk39
Kndc1.1	4.78837e-97	1.28154	0.86	0.488	5.41086e-94	1	Kndc1
Sh3gl3.1	1.32648e-96	1.36053	0.847	0.532	1.49892e-93	1	Sh3gl3
Chchd10.1	3.79057e-96	-2.82501	0.397	0.806	4.28334e-93	1	Chchd10
RGD1560394.1	6.46034e-96	-1.49958	0.404	0.76	7.30019e-93	1	RGD1560394
Smkr1.1	8.91604e-96	-1.19656	0.24	0.708	1.00751e-92	1	Smkr1
Mt3.1	6.89294e-95	-4.75892	0.607	0.853	7.78902e-92	1	Mt3
Clu.1	7.82434e-95	-2.77158	0.562	0.814	8.8415e-92	1	Clu
Sox10.1	1.08883e-94	1.0622	0.875	0.508	1.23038e-91	1	Sox10
Elmod1.1	2.03405e-94	-1.57408	0.123	0.718	2.29848e-91	1	Elmod1
Kif21a.1	5.99875e-92	1.11587	0.922	0.524	6.77859e-89	1	Kif21a
Sh3glb2.1	6.52029e-91	1.02017	0.851	0.282	7.36793e-88	1	Sh3glb2
Snapc2.1	7.01098e-91	1.16052	0.821	0.413	7.92241e-88	1	Snapc2
Lrrn1.1	1.20128e-90	0.940459	0.801	0.364	1.35745e-87	1	Lrrn1
Phyhipl.1	2.24509e-90	0.775839	0.888	0.552	2.53695e-87	1	Phyhipl
Dnajb2	3.55672e-90	1.14511	0.983	0.59	4.01909e-87	1	Dnajb2
Nfasc.1	4.52823e-90	0.898337	0.847	0.387	5.1169e-87	1	Nfasc
Gpd1.1	1.12005e-89	1.31894	0.819	0.436	1.26566e-86	1	Gpd1
Akr7a3.1	2.27163e-89	1.03461	0.767	0.346	2.56695e-86	1	Akr7a3
Ccdc153.1	2.4701e-89	-2.37733	0.482	0.789	2.79121e-86	1	Ccdc153
Rsph1.1	2.96354e-89	-1.85171	0.039	0.669	3.3488e-86	1	Rsph1
RGD1564664.1	3.34455e-89	-2.14441	0.156	0.552	3.77934e-86	1	RGD1564664
RGD1565611.1	1.08701e-88	-1.90627	0.106	0.698	1.22832e-85	1	RGD1565611
RGD1306233.1	2.34758e-87	-1.88565	0.391	0.768	2.65276e-84	1	RGD1306233
Myo1d.1	4.925e-87	0.953983	0.76	0.246	5.56525e-84	1	Myo1d
Acat2.1	3.69697e-86	0.96504	0.86	0.557	4.17758e-83	1	Acat2
Cd24.1	9.79755e-86	-1.27821	0.104	0.65	1.10712e-82	1	Cd24
Slc22a8	3.07824e-85	-1.27199	0.043	0.505	3.47841e-82	1	Slc22a8
Asrgl1.1	3.97514e-85	0.960375	0.94	0.639	4.49191e-82	1	Asrgl1
Enpp6.1	2.38778e-84	0.706539	0.661	0.106	2.69819e-81	1	Enpp6
Slco3a1.1	2.84799e-84	0.787436	0.868	0.397	3.21823e-81	1	Slco3a1
Cdh13.1	7.35099e-83	0.489501	0.689	0.288	8.30662e-80	1	Cdh13
Esam	7.70403e-83	-1.28578	0.032	0.471	8.70556e-80	1	Esam
Zbbx.1	1.3542e-82	-0.993523	0.015	0.574	1.53025e-79	1	Zbbx
Dact3.1	2.36553e-82	0.856321	0.717	0.122	2.67305e-79	1	Dact3
Cpd.1	7.30307e-82	1.03571	0.92	0.588	8.25247e-79	1	Cpd
Sparcl1	1.60374e-81	-2.62835	0.186	0.641	1.81222e-78	1	Sparcl1
Tspan15.1	2.40907e-81	0.942748	0.834	0.349	2.72225e-78	1	Tspan15
Sash1.1	2.65876e-81	0.931105	0.873	0.444	3.0044e-78	1	Sash1
Ccdc170.1	7.35465e-80	-1.0024	0.197	0.643	8.31075e-77	1	Ccdc170
Cep126.1	2.67551e-79	-1.02315	0.017	0.606	3.02333e-76	1	Cep126
Itm2a	4.91893e-77	-1.485	0.104	0.549	5.55839e-74	1	Itm2a
Rcan2	4.78527e-76	0.917993	0.922	0.494	5.40736e-73	1	Rcan2
Ppdpf.1	6.21101e-76	1.00789	0.981	0.75	7.01844e-73	1	Ppdpf
Hist3h2ba.1	1.928e-75	1.10044	0.829	0.509	2.17864e-72	1	Hist3h2ba
ENSRNOG00000011006.1	2.74989e-75	-1.66134	0.369	0.725	3.10738e-72	1	ENSRNOG00000011006
Rsph9.1	9.26045e-74	-1.58702	0.33	0.697	1.04643e-70	1	Rsph9
Kcnj10.1	9.49899e-74	0.879244	0.911	0.517	1.07339e-70	1	Kcnj10
Iqca1.1	2.24703e-73	-1.22061	0.052	0.586	2.53914e-70	1	Iqca1
Rgs5	2.55789e-73	-4.3148	0.242	0.609	2.89042e-70	1	Rgs5
AABR07056633.1.1	5.01187e-73	-0.988852	0.004	0.543	5.66342e-70	1	AABR07056633.1
Mlf1.1	6.10634e-73	-2.45683	0.14	0.572	6.90017e-70	1	Mlf1
Spag17.1	7.1595e-73	-1.28368	0.093	0.631	8.09023e-70	1	Spag17
Crip2.1	2.33929e-72	-1.76753	0.292	0.711	2.64339e-69	1	Crip2
Ccdc146.1	2.67603e-72	-1.23607	0.106	0.626	3.02392e-69	1	Ccdc146
Cyp2j10.1	2.79908e-72	1.41369	0.749	0.474	3.16296e-69	1	Cyp2j10
Pebp1.1	5.18121e-72	0.916448	0.991	0.931	5.85477e-69	1	Pebp1
Igfbp5.1	6.50637e-72	-1.66413	0.134	0.632	7.3522e-69	1	Igfbp5
Gstp1.1	1.07317e-71	1.08419	0.994	0.848	1.21268e-68	1	Gstp1
Rbfox1.1	1.87093e-71	-1.93374	0.274	0.735	2.11415e-68	1	Rbfox1
RGD1308544.1	2.99294e-70	-1.29134	0.389	0.728	3.38202e-67	1	RGD1308544
Npdc1.1	4.41469e-70	0.867009	0.79	0.254	4.98859e-67	1	Npdc1
Rtkn.1	1.12801e-69	0.707948	0.752	0.263	1.27466e-66	1	Rtkn
Mns1.1	1.15382e-69	-1.90757	0.153	0.621	1.30382e-66	1	Mns1
Filip1l.1	1.43413e-69	-1.80047	0.117	0.512	1.62057e-66	1	Filip1l
Pls1.1	1.48856e-69	0.846957	0.691	0.261	1.68207e-66	1	Pls1
Ankrd28.1	3.15665e-69	0.801041	0.877	0.428	3.56702e-66	1	Ankrd28
Tjp1.1	3.92386e-69	0.846459	0.933	0.494	4.43396e-66	1	Tjp1
ENSRNOG00000018960.1	5.87875e-69	-1.87275	0.389	0.76	6.64298e-66	1	ENSRNOG00000018960
Bcl2l15.1	2.63047e-68	-1.7975	0.395	0.712	2.97243e-65	1	Bcl2l15
Crip1.1	8.04661e-68	-3.49808	0.261	0.695	9.09267e-65	1	Crip1
Atp1b2.1	3.04192e-67	-2.37003	0.233	0.63	3.43737e-64	1	Atp1b2
Ebf1.1	4.76801e-67	-1.77107	0.248	0.601	5.38785e-64	1	Ebf1
ENSRNOG00000049075.1	4.76883e-67	1.09231	0.894	0.533	5.38877e-64	1	ENSRNOG00000049075
Slc24a2.1	1.91713e-66	0.993732	0.702	0.347	2.16635e-63	1	Slc24a2
Ncam1.1	4.56852e-66	0.790619	0.983	0.704	5.16242e-63	1	Ncam1
Atp9a.1	9.83343e-66	0.769094	0.754	0.344	1.11118e-62	1	Atp9a
Anxa5.1	1.43007e-65	-2.14078	0.41	0.742	1.61597e-62	1	Anxa5
Psd3.1	5.59172e-65	0.606441	0.786	0.405	6.31865e-62	1	Psd3
Tmem98	2.35181e-64	0.836808	0.855	0.453	2.65754e-61	1	Tmem98
ENSRNOG00000067240.1	4.05295e-64	0.907501	0.743	0.366	4.57984e-61	1	ENSRNOG00000067240
Pdgfrb.1	5.27792e-64	-1.83918	0.24	0.53	5.96405e-61	1	Pdgfrb
Gstm1.1	5.35938e-64	-3.22244	0.508	0.749	6.0561e-61	1	Gstm1
Aqp4	6.9919e-64	-1.64946	0.194	0.603	7.90085e-61	1	Aqp4
Mmd2.1	1.22301e-63	0.607727	0.801	0.59	1.382e-60	1	Mmd2
Iqcg.1	1.41838e-63	-0.98669	0.063	0.591	1.60277e-60	1	Iqcg
Apoe.1	1.43892e-63	-3.53207	0.86	0.915	1.62598e-60	1	Apoe
Paqr6.1	2.16127e-63	1.08633	0.793	0.585	2.44224e-60	1	Paqr6
Csrp2.1	1.18546e-62	-3.62395	0.374	0.716	1.33957e-59	1	Csrp2
Smc4	1.50237e-62	0.398456	0.719	0.232	1.69768e-59	1	Smc4
Atad2.1	1.76021e-62	-0.685937	0.266	0.627	1.98904e-59	1	Atad2
Fam227a.1	2.58468e-62	-1.03642	0.151	0.616	2.92069e-59	1	Fam227a
Rnd2.1	3.20895e-62	0.585976	0.821	0.416	3.62612e-59	1	Rnd2
Smim5.1	8.99429e-62	0.486965	0.562	0.102	1.01635e-58	1	Smim5
Myb.1	1.74215e-61	-1.35481	0.14	0.603	1.96863e-58	1	Myb
Efcab10.1	4.59572e-61	-1.34495	0.35	0.73	5.19317e-58	1	Efcab10
Dynlrb2.1	1.31983e-60	-3.38062	0.35	0.785	1.49141e-57	1	Dynlrb2
Tmem107.1	2.30803e-60	-2.03331	0.512	0.758	2.60808e-57	1	Tmem107
Daw1.1	2.44657e-60	-0.83438	0.371	0.674	2.76462e-57	1	Daw1
Emp3	2.48938e-60	-1.55773	0.197	0.57	2.813e-57	1	Emp3
Glipr1l1.1	2.68403e-60	-1.13833	0.359	0.685	3.03296e-57	1	Glipr1l1
Anxa2.1	4.01562e-60	-1.35942	0.19	0.628	4.53765e-57	1	Anxa2
Cd200.1	8.44702e-60	0.825935	0.747	0.44	9.54513e-57	1	Cd200
Dctpp1	3.35855e-58	0.582468	0.76	0.317	3.79516e-55	1	Dctpp1
Igsf11.1	6.76678e-58	0.734508	0.838	0.489	7.64646e-55	1	Igsf11
Zcchc18.1	1.52711e-57	-1.47629	0.225	0.676	1.72563e-54	1	Zcchc18
Lgi3.1	1.80355e-57	0.896144	0.782	0.511	2.03801e-54	1	Lgi3
ENSRNOG00000039749.1	1.92715e-57	-1.79526	0.369	0.754	2.17768e-54	1	ENSRNOG00000039749
Nnat.1	2.52667e-57	-3.24319	0.521	0.794	2.85514e-54	1	Nnat
Dnai4.1	2.93589e-57	-1.86383	0.117	0.587	3.31756e-54	1	Dnai4
Pfn2.1	1.05594e-56	0.634316	0.782	0.446	1.19322e-53	1	Pfn2
Zcchc12.1	1.38757e-56	-1.31765	0.501	0.684	1.56795e-53	1	Zcchc12
ENSRNOG00000050647.1	3.70465e-56	-1.73009	0.747	0.894	4.18626e-53	1	ENSRNOG00000050647
Adamts4.1	7.15028e-56	0.762194	0.73	0.462	8.07981e-53	1	Adamts4
Mgp.1	3.99517e-55	-3.56874	0.296	0.565	4.51454e-52	1	Mgp
Serpinh1.1	1.47714e-54	-1.87118	0.22	0.611	1.66917e-51	1	Serpinh1
Spaca9.1	2.95266e-54	-1.71789	0.384	0.756	3.33651e-51	1	Spaca9
Col9a3.1	7.12786e-53	1.00568	0.702	0.332	8.05449e-50	1	Col9a3
Atp1a2.1	1.51795e-52	-2.38849	0.246	0.563	1.71528e-49	1	Atp1a2
Rgs22.1	2.97822e-52	-1.15728	0.212	0.61	3.36539e-49	1	Rgs22
H1f2.1	3.76543e-52	1.01811	0.89	0.556	4.25494e-49	1	H1f2
Sdc2.1	5.53705e-52	-1.6966	0.471	0.688	6.25686e-49	1	Sdc2
Cd248	3.21779e-51	-1.07289	0.246	0.512	3.6361e-48	1	Cd248
Sox2.1	3.73589e-51	-2.25391	0.514	0.789	4.22156e-48	1	Sox2
ENSRNOG00000032729.1	4.13225e-51	-1.33345	0.365	0.732	4.66945e-48	1	ENSRNOG00000032729
Bcat1	6.91796e-51	0.557464	0.771	0.355	7.8173e-48	1	Bcat1
Flrt1	8.95372e-51	-0.490758	0.192	0.529	1.01177e-47	1	Flrt1
Arl6ip1.1	1.13706e-50	0.689717	0.994	0.903	1.28487e-47	1	Arl6ip1
Adgrl3.1	4.88145e-50	0.624545	0.812	0.373	5.51603e-47	1	Adgrl3
Hspa2.1	5.70557e-50	-1.39294	0.387	0.721	6.4473e-47	1	Hspa2
Rarres2	2.84237e-49	-2.06512	0.235	0.549	3.21187e-46	1	Rarres2
Pcsk1n	6.32643e-49	0.65663	0.996	0.837	7.14887e-46	1	Pcsk1n
Fhad1.1	8.13192e-49	-0.853754	0.214	0.591	9.18907e-46	1	Fhad1
Epas1	1.17615e-48	-0.737534	0.158	0.474	1.32905e-45	1	Epas1
Art3.1	1.43244e-48	-1.14831	0.13	0.418	1.61865e-45	1	Art3
Hspb1.1	1.87111e-48	-1.49935	0.324	0.627	2.11435e-45	1	Hspb1
Fstl1.1	1.99668e-48	-1.22036	0.143	0.499	2.25625e-45	1	Fstl1
Ccdc30.1	2.74985e-48	-1.4965	0.367	0.664	3.10733e-45	1	Ccdc30
Enpep	1.33643e-47	-1.0292	0.03	0.426	1.51017e-44	1	Enpep
Rbp1.1	3.13335e-47	-1.24618	0.38	0.637	3.54069e-44	1	Rbp1
Tmem47.1	4.15764e-47	-1.61466	0.356	0.661	4.69813e-44	1	Tmem47
Sox4.1	6.32289e-47	-1.16118	0.533	0.763	7.14487e-44	1	Sox4
Lgals1.1	7.03653e-47	-1.73821	0.266	0.565	7.95128e-44	1	Lgals1
Clic4.1	7.06117e-47	0.646924	0.862	0.431	7.97912e-44	1	Clic4
Eml2	3.41518e-46	0.689906	0.721	0.338	3.85915e-43	1	Eml2
Ckap5	7.00203e-46	0.485058	0.836	0.426	7.91229e-43	1	Ckap5
ENSRNOG00000064025	1.12953e-45	0.487881	0.575	0.138	1.27636e-42	1	ENSRNOG00000064025
ENSRNOG00000063848	3.43845e-45	-0.369853	0.015	0.414	3.88545e-42	1	ENSRNOG00000063848
Spag6l.1	5.57631e-45	-1.32241	0.35	0.686	6.30122e-42	1	Spag6l
Cd9	1.00771e-44	0.810799	0.987	0.856	1.13871e-41	1	Cd9
Iqgap2.1	1.14328e-44	-1.08063	0.207	0.571	1.2919e-41	1	Iqgap2
ENSRNOG00000000875.1	1.14485e-44	-1.84667	0.259	0.609	1.29368e-41	1	ENSRNOG00000000875
Ankrd66.1	2.6568e-44	-1.83221	0.428	0.665	3.00219e-41	1	Ankrd66
Tubb6	5.05875e-44	-0.875741	0.203	0.486	5.71639e-41	1	Tubb6
Thra.1	6.61475e-44	0.656263	0.952	0.724	7.47467e-41	1	Thra
Il33	6.91809e-44	-0.344448	0.285	0.568	7.81744e-41	1	Il33
Enkur.1	9.96492e-44	-1.37495	0.384	0.631	1.12604e-40	1	Enkur
Cystm1	5.74107e-43	0.57958	0.95	0.605	6.48741e-40	1	Cystm1
Pifo.1	1.24709e-42	-1.26136	0.371	0.684	1.40922e-39	1	Pifo
Jam3.1	4.72871e-42	0.420054	0.968	0.686	5.34344e-39	1	Jam3
Plec.1	5.19971e-42	-1.14891	0.181	0.547	5.87567e-39	1	Plec
Fermt2.1	9.20855e-42	0.513941	0.987	0.784	1.04057e-38	1	Fermt2
AC128848.1.1	1.6724e-41	-1.05148	0.229	0.612	1.88981e-38	1	AC128848.1
Nckap1.1	2.90039e-41	0.496649	0.855	0.44	3.27744e-38	1	Nckap1
Rprm.1	4.72791e-41	-0.648894	0.473	0.635	5.34254e-38	1	Rprm
Cald1.1	9.48597e-41	-3.22307	0.382	0.618	1.07191e-37	1	Cald1
Ier3.1	1.55799e-40	-1.33833	0.842	0.865	1.76053e-37	1	Ier3
Ccnd2.1	2.04993e-40	-1.74839	0.514	0.669	2.31642e-37	1	Ccnd2
Resp18.1	3.19477e-40	0.476033	0.773	0.609	3.61009e-37	1	Resp18
Rrad.1	3.49451e-40	-1.43337	0.266	0.481	3.9488e-37	1	Rrad
Bex4.1	3.7328e-40	-0.874105	0.4	0.622	4.21807e-37	1	Bex4
Tuba1b	3.94482e-40	0.563437	0.998	0.979	4.45764e-37	1	Tuba1b
S100a11.1	1.0457e-39	-1.57546	0.201	0.579	1.18164e-36	1	S100a11
Dnai3.1	1.41989e-39	-0.904833	0.382	0.625	1.60448e-36	1	Dnai3
Ccdc141.1	2.15929e-39	-0.358316	0.609	0.229	2.44e-36	1	Ccdc141
AABR07005985.1.1	2.76915e-39	-1.35035	0.056	0.491	3.12914e-36	1	AABR07005985.1
Phgdh	3.61926e-39	0.743468	0.769	0.571	4.08977e-36	1	Phgdh
Lrrc4b.1	3.93281e-39	0.454713	0.793	0.458	4.44407e-36	1	Lrrc4b
Dnah7.1	1.14999e-38	-0.748983	0.082	0.499	1.29949e-35	1	Dnah7
Rsph10b.1	3.10268e-38	-0.886242	0.484	0.646	3.50603e-35	1	Rsph10b
ENSRNOG00000006030.1	1.28189e-37	-1.94828	0.564	0.679	1.44854e-34	1	ENSRNOG00000006030
Tekt2.1	1.51266e-37	-1.16435	0.138	0.485	1.70931e-34	1	Tekt2
Pdlim4.1	2.50686e-37	-1.94413	0.24	0.559	2.83275e-34	1	Pdlim4
Ahnak.1	7.67144e-37	-1.09874	0.212	0.525	8.66872e-34	1	Ahnak
Ednrb.1	1.08376e-36	-1.99446	0.413	0.637	1.22465e-33	1	Ednrb
ENSRNOG00000004564.1	3.86949e-36	-1.88569	0.413	0.731	4.37252e-33	1	ENSRNOG00000004564
Cd59.1	4.71302e-36	-1.26523	0.266	0.577	5.32571e-33	1	Cd59
S100a1	7.02147e-36	0.711079	0.834	0.655	7.93426e-33	1	S100a1
Lamc3	1.24144e-35	-0.675734	0.21	0.397	1.40282e-32	1	Lamc3
Htra1.1	1.88194e-35	0.588554	0.691	0.47	2.12659e-32	1	Htra1
Capsl.1	2.11763e-35	-1.73398	0.371	0.556	2.39292e-32	1	Capsl
Prxl2a	2.52548e-35	0.460317	0.853	0.614	2.85379e-32	1	Prxl2a
Ddr1	3.42071e-35	0.545925	0.806	0.493	3.86541e-32	1	Ddr1
Adgb.1	6.17011e-35	-1.08423	0.162	0.51	6.97223e-32	1	Adgb
Atp1b1	8.388e-35	0.487245	0.896	0.729	9.47844e-32	1	Atp1b1
Ppp1r32.1	1.33169e-34	-1.22318	0.268	0.641	1.50481e-31	1	Ppp1r32
Dnah6.1	1.5364e-34	-1.11189	0.397	0.606	1.73614e-31	1	Dnah6
Ccnd1.1	2.39002e-34	-1.73886	0.447	0.619	2.70073e-31	1	Ccnd1
G0s2.1	4.6254e-34	-1.43571	0.428	0.577	5.22671e-31	1	G0s2
Gpm6a	4.62957e-34	-0.930863	0.289	0.577	5.23142e-31	1	Gpm6a
Syde2.1	5.53792e-34	0.528396	0.631	0.406	6.25786e-31	1	Syde2
Foxs1.1	1.05297e-33	-1.67791	0.374	0.548	1.18985e-30	1	Foxs1
Tcf4.1	1.19712e-33	0.508289	0.959	0.679	1.35275e-30	1	Tcf4
Emilin2	1.99598e-33	0.264477	0.49	0.092	2.25545e-30	1	Emilin2
Id2	3.31773e-33	-0.543721	0.413	0.601	3.74903e-30	1	Id2
ENSRNOG00000003786.1	1.28443e-32	-1.23703	0.43	0.648	1.4514e-29	1	ENSRNOG00000003786
Ifitm6.1	1.62329e-32	-0.295403	0.244	0.541	1.83432e-29	1	Ifitm6
Cyfip2.1	4.87129e-32	0.359689	0.633	0.319	5.50456e-29	1	Cyfip2
ENSRNOG00000062927.1	5.08475e-32	0.527415	0.898	0.644	5.74576e-29	1	ENSRNOG00000062927
Slc7a5	5.39085e-32	-0.330044	0.136	0.435	6.09166e-29	1	Slc7a5
Lmna.1	6.01413e-32	0.372086	0.873	0.529	6.79597e-29	1	Lmna
Dut.1	1.98661e-31	-0.598506	0.376	0.666	2.24487e-28	1	Dut
Hbb-b1	2.44303e-31	-0.946794	0.773	0.786	2.76062e-28	1	Hbb-b1
Clip3.1	2.51774e-31	0.509751	0.68	0.382	2.84505e-28	1	Clip3
Tshz2.1	7.13818e-31	-1.28335	0.285	0.568	8.06615e-28	1	Tshz2
Ccn1.1	1.00491e-30	-0.858843	0.199	0.503	1.13554e-27	1	Ccn1
Gucy1a1.1	1.25051e-30	-1.20982	0.346	0.501	1.41308e-27	1	Gucy1a1
Psip1	1.98159e-30	0.490001	0.976	0.763	2.23919e-27	1	Psip1
Gadd45b.1	3.14684e-30	0.50549	0.667	0.333	3.55593e-27	1	Gadd45b
Fxyd1.1	4.92505e-30	-1.65726	0.309	0.541	5.5653e-27	1	Fxyd1
Dnah5.1	6.0202e-30	-0.861406	0.546	0.615	6.80283e-27	1	Dnah5
Mgst3.1	6.0427e-30	0.397476	0.875	0.632	6.82825e-27	1	Mgst3
Sncg.1	7.75703e-30	-0.441459	0.13	0.402	8.76545e-27	1	Sncg
Sox8.1	1.09268e-29	0.59979	0.665	0.515	1.23473e-26	1	Sox8
Spa17.1	1.67187e-29	-1.31289	0.311	0.552	1.88921e-26	1	Spa17
Ephb1	1.93981e-29	0.415891	0.648	0.37	2.19199e-26	1	Ephb1
Itgb8	2.81521e-29	0.345931	0.674	0.439	3.18118e-26	1	Itgb8
Pcdhga7	4.35367e-29	-1.03284	0.475	0.652	4.91965e-26	1	Pcdhga7
Col4a1	4.81831e-29	-1.53172	0.6	0.658	5.44469e-26	1	Col4a1
Fcgrt.1	6.41022e-29	-1.13562	0.417	0.583	7.24354e-26	1	Fcgrt
Sod2.1	1.00744e-28	0.352026	0.892	0.6	1.13841e-25	1	Sod2
Cdhr4.1	2.94706e-28	-1.71279	0.281	0.538	3.33018e-25	1	Cdhr4
Fam183a.1	4.89567e-28	-3.1764	0.251	0.595	5.53211e-25	1	Fam183a
Fabp7	6.47901e-28	1.54555	0.832	0.757	7.32128e-25	1	Fabp7
Tril.1	1.2768e-27	-1.0723	0.302	0.499	1.44278e-24	1	Tril
Clec18a.1	1.34522e-27	-0.535556	0.069	0.437	1.5201e-24	1	Clec18a
Chst2.1	1.52882e-27	0.534129	0.756	0.499	1.72757e-24	1	Chst2
Map3k7cl.1	2.20463e-27	-1.05838	0.24	0.455	2.49123e-24	1	Map3k7cl
Cited2.1	6.16286e-27	-0.936299	0.374	0.609	6.96403e-24	1	Cited2
Bcam	9.39749e-27	-1.05747	0.227	0.445	1.06192e-23	1	Bcam
Maob.1	3.36196e-26	-0.564603	0.134	0.472	3.79902e-23	1	Maob
Lsamp	5.80207e-26	-0.323859	0.298	0.579	6.55634e-23	1	Lsamp
Ptn.1	7.12698e-26	-0.263327	0.996	0.786	8.05349e-23	1	Ptn
Uchl1.1	7.15813e-26	-1.05262	0.369	0.596	8.08869e-23	1	Uchl1
Ifitm2.1	1.57473e-25	-2.43277	0.523	0.618	1.77944e-22	1	Ifitm2
Cep290.1	1.73374e-25	-0.877969	0.251	0.552	1.95913e-22	1	Cep290
Mt2A.1	2.38286e-25	-1.66492	0.019	0.443	2.69264e-22	1	Mt2A
Igfbpl1.1	2.91035e-25	-1.5569	0.514	0.73	3.2887e-22	1	Igfbpl1
Tppp3	7.27373e-25	0.474945	0.898	0.641	8.21932e-22	1	Tppp3
Ecrg4	8.50086e-25	-0.42244	0.555	0.589	9.60597e-22	1	Ecrg4
Sgcb.1	9.87001e-25	0.282823	0.857	0.505	1.11531e-21	1	Sgcb
Cfap45.1	1.14086e-24	-1.61181	0.261	0.542	1.28917e-21	1	Cfap45
ENSRNOG00000066703	1.90896e-24	-0.313737	0.283	0.511	2.15712e-21	1	ENSRNOG00000066703
Drc1.1	2.55693e-24	-1.66806	0.186	0.525	2.88933e-21	1	Drc1
Ccdc39.1	2.76064e-24	-1.38538	0.35	0.583	3.11952e-21	1	Ccdc39
Foxd1.1	3.72003e-24	-0.973831	0.251	0.453	4.20363e-21	1	Foxd1
Cdkn2d.1	2.64944e-23	0.288304	0.672	0.475	2.99386e-20	1	Cdkn2d
Rnd3	4.59085e-23	-1.3214	0.546	0.608	5.18766e-20	1	Rnd3
Rgs4.1	7.11117e-23	-2.12743	0.227	0.489	8.03563e-20	1	Rgs4
Id4.1	8.39726e-23	-2.90377	0.434	0.575	9.4889e-20	1	Id4
Vwa1.1	1.08288e-22	0.317064	0.479	0.144	1.22365e-19	1	Vwa1
Lxn.1	2.93396e-22	-1.10709	0.613	0.659	3.31537e-19	1	Lxn
Agt.1	3.55211e-22	-1.55698	0.525	0.244	4.01388e-19	1	Agt
Tubb3.1	5.82377e-22	0.472453	0.54	0.306	6.58086e-19	1	Tubb3
Arl4a.1	7.64172e-22	-0.875319	0.654	0.761	8.63514e-19	1	Arl4a
Mlc1.1	1.17663e-21	-1.30109	0.415	0.565	1.32959e-18	1	Mlc1
Sorbs1.1	1.7602e-21	-0.721987	0.201	0.474	1.98903e-18	1	Sorbs1
Txn1	3.2997e-21	-0.880398	0.92	0.865	3.72866e-18	1	Txn1
Vegfa.1	3.38516e-21	-0.455524	0.324	0.532	3.82523e-18	1	Vegfa
Plat.1	8.05218e-21	-1.5364	0.406	0.582	9.09896e-18	1	Plat
Tpm1.1	9.50076e-21	-1.86248	0.823	0.732	1.07359e-17	1	Tpm1
Zap70.1	1.16931e-20	-0.901147	0.322	0.478	1.32133e-17	1	Zap70
Dnah11.1	2.12307e-20	-0.816075	0.475	0.57	2.39906e-17	1	Dnah11
Phlda1	2.16904e-20	-0.871296	0.22	0.458	2.45102e-17	1	Phlda1
Cfap100.1	2.80295e-20	-1.21206	0.475	0.672	3.16733e-17	1	Cfap100
Dner.1	3.43268e-20	-0.941986	0.238	0.51	3.87893e-17	1	Dner
Sptan1.1	3.53686e-20	-1.36978	0.693	0.696	3.99665e-17	1	Sptan1
Actn1.1	5.79857e-20	-0.82801	0.387	0.523	6.55238e-17	1	Actn1
ENSRNOG00000027520	6.009e-20	0.38099	0.691	0.439	6.79017e-17	1	ENSRNOG00000027520
Ca4	8.57878e-20	-0.868298	0.415	0.537	9.69402e-17	1	Ca4
Kitlg.1	1.51293e-19	-0.367656	0.652	0.352	1.70961e-16	1	Kitlg
Sox6	2.02614e-19	-0.445484	0.168	0.405	2.28954e-16	1	Sox6
Kcna6	2.83772e-19	0.654499	0.641	0.578	3.20662e-16	1	Kcna6
AABR07073181.1.1	4.68841e-19	-0.277122	0.33	0.149	5.2979e-16	1	AABR07073181.1
Cfap69.1	6.15294e-19	-1.2169	0.305	0.472	6.95282e-16	1	Cfap69
C1qtnf9	7.44244e-19	0.711018	0.458	0.075	8.40995e-16	1	C1qtnf9
Il1b	8.05835e-19	-0.279578	0.348	0.532	9.10593e-16	1	Il1b
Pth1r.1	9.68684e-19	-1.88185	0.484	0.538	1.09461e-15	1	Pth1r
Serpinb9	1.01819e-18	-0.274342	0.257	0.429	1.15055e-15	1	Serpinb9
Ifitm1	2.00371e-18	-1.18094	0.38	0.502	2.26419e-15	1	Ifitm1
Tm4sf1.1	2.04375e-18	-1.26576	0.367	0.496	2.30944e-15	1	Tm4sf1
Mfsd2a.1	3.08773e-18	0.508726	0.592	0.425	3.48914e-15	1	Mfsd2a
Scg3.1	5.30784e-18	-0.353779	0.609	0.458	5.99786e-15	1	Scg3
Cox4i2.1	9.42492e-18	-3.21111	0.512	0.575	1.06502e-14	1	Cox4i2
Ralgps2	1.49291e-17	-0.469968	0.477	0.562	1.68699e-14	1	Ralgps2
Fam166b.1	2.08198e-17	-1.80897	0.611	0.765	2.35264e-14	1	Fam166b
Tmem212.1	3.30942e-17	-2.58196	0.575	0.758	3.73965e-14	1	Tmem212
Septin11	3.72225e-17	-0.880917	0.294	0.491	4.20614e-14	1	Septin11
Ccdc180.1	5.07318e-17	-0.837868	0.052	0.404	5.73269e-14	1	Ccdc180
Nsg1.1	7.73582e-17	-0.280479	0.454	0.24	8.74147e-14	1	Nsg1
Akap14.1	1.1728e-16	-1.23634	0.268	0.494	1.32526e-13	1	Akap14
Cav1	1.42602e-16	-0.449737	0.406	0.56	1.6114e-13	1	Cav1
Ndufa4l2.1	1.60594e-16	-2.22524	0.108	0.426	1.81471e-13	1	Ndufa4l2
Flna	3.37379e-16	-0.639029	0.233	0.425	3.81239e-13	1	Flna
Ripor2	3.42452e-16	-0.250293	0.244	0.415	3.86971e-13	1	Ripor2
Ntrk2.1	3.66943e-16	-1.8121	0.549	0.602	4.14646e-13	1	Ntrk2
Crocc.1	5.27581e-16	-0.85389	0.261	0.456	5.96166e-13	1	Crocc
C1qtnf5.1	6.35082e-16	-1.14269	0.512	0.573	7.17643e-13	1	C1qtnf5
Rbpj.1	6.95627e-16	-0.799936	0.629	0.699	7.86059e-13	1	Rbpj
Cdkl4.1	1.25744e-15	-0.848949	0.393	0.563	1.42091e-12	1	Cdkl4
Olig2.1	1.38222e-15	0.32689	0.616	0.428	1.56191e-12	1	Olig2
Gng11.1	1.43278e-15	-3.27014	0.477	0.521	1.61904e-12	1	Gng11
Anxa1.1	2.11467e-15	-0.5349	0.501	0.281	2.38958e-12	1	Anxa1
Slc5a11.1	1.15748e-14	0.508262	0.575	0.496	1.30795e-11	1	Slc5a11
Map2	1.19392e-14	-0.443541	0.216	0.442	1.34913e-11	1	Map2
Pcp4.1	2.15425e-14	-0.595466	0.201	0.446	2.4343e-11	1	Pcp4
Nr4a3.1	2.30586e-14	-1.12003	0.473	0.625	2.60562e-11	1	Nr4a3
Cxcr4.1	3.34162e-14	-0.726111	0.179	0.416	3.77603e-11	1	Cxcr4
Myof.1	4.4055e-14	-0.514432	0.471	0.249	4.97821e-11	1	Myof
Gucy1b1.1	7.3589e-14	-1.02126	0.438	0.536	8.31555e-11	1	Gucy1b1
Cfap299.1	1.06349e-13	-1.62732	0.335	0.529	1.20175e-10	1	Cfap299
Gadd45a	1.15848e-13	-0.513198	0.231	0.418	1.30908e-10	1	Gadd45a
Cd83.1	1.16658e-13	-0.371933	0.613	0.671	1.31824e-10	1	Cd83
Cxcl12	1.39631e-13	-1.34303	0.609	0.565	1.57783e-10	1	Cxcl12
Cfap43.1	1.85862e-13	-1.14839	0.274	0.498	2.10024e-10	1	Cfap43
Tgfb2.1	2.16792e-13	-0.269759	0.294	0.381	2.44975e-10	1	Tgfb2
Akap2	2.19418e-13	-0.556409	0.337	0.467	2.47943e-10	1	Akap2
Calb1.1	2.37343e-13	-0.69947	0.371	0.43	2.68198e-10	1	Calb1
Srgn	6.79427e-13	-0.647989	0.641	0.678	7.67752e-10	1	Srgn
Tagln3	1.47067e-12	-0.470954	0.283	0.449	1.66186e-09	1	Tagln3
Rp1	2.35731e-12	-0.435224	0.184	0.429	2.66376e-09	1	Rp1
Ccl2	3.05824e-12	-0.542644	0.499	0.317	3.45582e-09	1	Ccl2
Vcan.1	3.6194e-12	-0.414017	0.523	0.382	4.08992e-09	1	Vcan
Dmd.1	4.07573e-12	-1.15244	0.415	0.518	4.60558e-09	1	Dmd
Lef1	5.61069e-12	-0.552815	0.544	0.533	6.34008e-09	1	Lef1
Lrrc36.1	9.80208e-12	-1.35727	0.564	0.701	1.10764e-08	1	Lrrc36
Ak7.1	2.42915e-11	-1.43548	0.255	0.423	2.74494e-08	1	Ak7
Tubb5	2.52517e-11	-0.64257	0.78	0.774	2.85344e-08	1	Tubb5
Lyz2.1	2.60154e-11	-0.971543	0.596	0.68	2.93974e-08	1	Lyz2
Hsd11b1.1	3.91696e-11	-1.01628	0.419	0.471	4.42616e-08	1	Hsd11b1
Hba-a2	5.05207e-11	-0.735365	0.689	0.686	5.70884e-08	1	Hba-a2
Ndnf.1	9.17406e-11	-0.406996	0.603	0.358	1.03667e-07	1	Ndnf
Phlda3.1	1.03513e-10	0.463122	0.475	0.243	1.1697e-07	1	Phlda3
ENSRNOG00000069624.1	2.05981e-10	-0.305584	0.587	0.629	2.32759e-07	1	ENSRNOG00000069624
Ttyh1	2.25991e-10	-0.79007	0.207	0.311	2.55369e-07	1	Ttyh1
Aurkb.1	2.28888e-10	-0.332838	0.276	0.179	2.58643e-07	1	Aurkb
Gpr37l1.1	2.29416e-10	-0.592205	0.294	0.438	2.5924e-07	1	Gpr37l1
Ch25h	2.62525e-10	-0.605073	0.501	0.603	2.96654e-07	1	Ch25h
Ccdc113.1	3.20877e-10	-1.24305	0.369	0.489	3.62591e-07	1	Ccdc113
Mcm6.1	4.64855e-10	-0.310747	0.369	0.455	5.25286e-07	1	Mcm6
Plagl1.1	4.74202e-10	-0.636414	0.568	0.348	5.35848e-07	1	Plagl1
Dnah3.1	5.87067e-10	-0.657391	0.434	0.284	6.63385e-07	1	Dnah3
ENSRNOG00000066616.1	1.11951e-09	-3.34829	0.184	0.435	1.26505e-06	1	ENSRNOG00000066616
Socs3	1.15704e-09	-0.510584	0.492	0.554	1.30745e-06	1	Socs3
ENSRNOG00000024338.1	1.46801e-09	-1.45499	0.616	0.656	1.65885e-06	1	ENSRNOG00000024338
Col1a2.1	2.18097e-09	-0.737869	0.229	0.37	2.4645e-06	1	Col1a2
Col6a1.1	4.13788e-09	-1.43863	0.24	0.372	4.6758e-06	1	Col6a1
Sdc4	6.78618e-09	-0.67953	0.49	0.506	7.66838e-06	1	Sdc4
Hcar2	7.41515e-09	-0.672656	0.749	0.764	8.37912e-06	1	Hcar2
Anpep	8.31502e-09	-0.388271	0.108	0.292	9.39597e-06	1	Anpep
Plpp3	1.2004e-08	-1.04518	0.529	0.556	1.35645e-05	1	Plpp3
Scg5.1	1.63208e-08	-1.02303	0.652	0.792	1.84425e-05	1	Scg5
Hmox1	2.05157e-08	-0.43025	0.65	0.622	2.31828e-05	1	Hmox1
Phldb2	2.8497e-08	-0.52671	0.419	0.51	3.22017e-05	1	Phldb2
Timp1.1	3.54005e-08	-0.656484	0.305	0.37	4.00025e-05	1	Timp1
ENSRNOG00000065736	1.23961e-07	-0.285348	0.641	0.524	0.000140076	1	ENSRNOG00000065736
Cebpd	3.89081e-07	-0.506865	0.333	0.475	0.000439661	1	Cebpd
Cd63.1	5.79819e-07	-0.613852	0.976	0.974	0.000655195	1	Cd63
Abhd3.1	7.93064e-07	-0.27154	0.877	0.672	0.000896162	1	Abhd3
Sox9.1	8.14321e-07	-1.41141	0.711	0.747	0.000920183	1	Sox9
Zic2	8.63254e-07	-0.584515	0.276	0.389	0.000975477	1	Zic2
Gadd45g.1	1.14314e-06	-0.596114	0.49	0.507	0.00129174	1	Gadd45g
ENSRNOG00000065062.1	1.38685e-06	-0.39571	0.49	0.583	0.00156714	1	ENSRNOG00000065062
Cabcoco1.1	1.51111e-06	-1.22254	0.51	0.528	0.00170756	1	Cabcoco1
Anxa6	1.60412e-06	-0.265583	0.294	0.232	0.00181265	1	Anxa6
Serpinb6a.1	1.89316e-06	-0.535329	0.445	0.506	0.00213927	1	Serpinb6a
Mafb.1	1.97386e-06	-0.429798	0.542	0.591	0.00223047	1	Mafb
Fcgr3a.1	1.99785e-06	-0.524394	0.57	0.627	0.00225757	1	Fcgr3a
Cfap77.1	2.21594e-06	-1.01704	0.4	0.489	0.00250401	1	Cfap77
Ccdc162.1	2.76936e-06	-0.92768	0.289	0.358	0.00312938	1	Ccdc162
Nkx6-1.1	5.71462e-06	-0.65555	0.367	0.334	0.00645752	1	Nkx6-1
Lrrc34.1	5.98156e-06	-1.109	0.49	0.496	0.00675916	1	Lrrc34
Tubb4b.1	6.27533e-06	-1.1396	0.762	0.684	0.00709112	1	Tubb4b
Lama2.1	1.63859e-05	-0.390791	0.533	0.339	0.0185161	1	Lama2
C1ql1.1	2.48789e-05	-0.843563	0.57	0.392	0.0281131	1	C1ql1
Cfap44.1	2.70331e-05	-1.46875	0.229	0.419	0.0305474	1	Cfap44
Prdx5.1	2.75445e-05	-0.543765	0.821	0.73	0.0311253	1	Prdx5
ENSRNOG00000037661	2.85877e-05	-0.38798	0.538	0.581	0.0323041	1	ENSRNOG00000037661
Lgals3.1	3.46823e-05	-0.558978	0.337	0.44	0.039191	1	Lgals3
Trib2	3.60909e-05	-0.337693	0.438	0.303	0.0407827	1	Trib2
Chl1	9.03837e-05	-0.409825	0.378	0.434	0.102134	1	Chl1
Itih3.1	0.000102685	-0.871436	0.259	0.356	0.116034	1	Itih3
AABR07060872.1	0.000115533	-0.495414	0.276	0.166	0.130553	1	AABR07060872.1
Apol3.1	0.000117773	-0.503053	0.359	0.243	0.133084	1	Apol3
Igf1	0.000150656	-0.44437	0.575	0.386	0.170242	1	Igf1
Nedd4.1	0.000172386	-0.379827	0.957	0.817	0.194796	1	Nedd4
Fosb.1	0.000197568	-0.62728	0.225	0.362	0.223252	1	Fosb
Id3.1	0.000199072	-0.768055	0.473	0.439	0.224951	1	Id3
Iqgap1	0.000307242	-0.273419	0.06	0.265	0.347183	1	Iqgap1
Apcdd1.1	0.000491532	-0.345957	0.451	0.297	0.555431	1	Apcdd1
Cnn3.1	0.000572099	-0.579814	0.914	0.739	0.646472	1	Cnn3
S100a10.1	0.000584776	-0.6704	0.436	0.519	0.660797	1	S100a10
Colec12.1	0.000590365	-0.404568	0.309	0.33	0.667113	1	Colec12
ENSRNOG00000021943.1	0.000599694	-0.672628	0.365	0.453	0.677654	1	ENSRNOG00000021943
Ccdc34.1	0.000842474	-0.871684	0.598	0.617	0.951996	1	Ccdc34
ENSRNOG00000019926.1	0.000896558	-0.333634	0.607	0.599	1	1	ENSRNOG00000019926
Hmgb2l1.1.1	0.000982212	-0.487521	0.542	0.568	1	1	Hmgb2l1.1
ENSRNOG00000064399	0.00103352	-0.367268	0.43	0.517	1	1	ENSRNOG00000064399
Ccdc40.1	0.00121213	-1.53867	0.438	0.438	1	1	Ccdc40
ENSRNOG00000028822.1	0.00121683	-0.46217	0.683	0.703	1	1	ENSRNOG00000028822
H2az1.1	0.00144471	-0.466651	0.935	0.802	1	1	H2az1
Hopx	0.00182695	-0.397076	0.711	0.725	1	1	Hopx
Col11a1.1	0.00184186	-0.558139	0.307	0.292	1	1	Col11a1
Bcl2a1	0.00208331	-0.395872	0.674	0.653	1	1	Bcl2a1
Rgcc	0.00209092	-0.576908	0.549	0.376	1	1	Rgcc
H1f4	0.00218109	-0.467068	0.421	0.464	1	1	H1f4
Dnali1.1	0.00245668	-1.04197	0.613	0.443	1	1	Dnali1
Thy1.1	0.00301214	-0.287458	0.387	0.405	1	1	Thy1
AABR07007032.1	0.00365524	-0.394914	0.441	0.346	1	1	AABR07007032.1
Timp4	0.00463855	-0.276423	0.233	0.305	1	1	Timp4
Cxcl2.1	0.00585532	-0.410352	0.603	0.422	1	1	Cxcl2
Mcam.1	0.00587879	-0.339736	0.62	0.508	1	1	Mcam
Bcan.1	0.00606669	-0.683267	0.346	0.382	1	1	Bcan
Pcdh18.1	0.00613438	-0.81374	0.242	0.32	1	1	Pcdh18
Gfap.1	0.00657298	-0.556571	0.557	0.408	1	1	Gfap
Ccl4	0.00666924	-0.808265	0.624	0.64	1	1	Ccl4
Slc1a2.1	0.00751589	-0.3218	0.458	0.358	1	1	Slc1a2
Hmgb2l1.2	0.00998617	-0.327892	0.477	0.522	1	1	Hmgb2l1
Igfbp7.1	1.31369e-158	6.67756	0.997	0.32	1.48447e-155	2	Igfbp7
Cald1.2	4.08967e-156	4.58909	0.997	0.414	4.62133e-153	2	Cald1
Rgs5.1	3.61354e-154	5.80493	0.983	0.35	4.08329e-151	2	Rgs5
Gng11.2	7.76678e-152	4.68587	0.983	0.376	8.77646e-149	2	Gng11
Cox4i2.2	3.63809e-146	4.68388	0.967	0.441	4.11104e-143	2	Cox4i2
Rgs4.2	6.64039e-146	3.36184	0.95	0.251	7.50364e-143	2	Rgs4
Pdgfrb.2	1.10625e-144	3.08436	0.94	0.294	1.25007e-141	2	Pdgfrb
Foxs1.2	3.51236e-144	2.91771	0.936	0.367	3.96897e-141	2	Foxs1
AABR07028488.1.1	3.15076e-142	3.60559	0.99	0.508	3.56036e-139	2	AABR07028488.1
Ndufa4l2.2	5.63269e-141	3.52519	0.943	0.149	6.36494e-138	2	Ndufa4l2
Mgp.2	1.57429e-139	4.06351	0.967	0.341	1.77895e-136	2	Mgp
Ifitm2.2	5.31866e-136	3.59919	0.967	0.482	6.01009e-133	2	Ifitm2
Slc22a8.1	2.48836e-134	2.37887	0.906	0.198	2.81184e-131	2	Slc22a8
Rrad.2	2.91231e-131	2.79002	0.93	0.266	3.29091e-128	2	Rrad
Rarres2.1	3.99028e-129	3.29352	0.936	0.309	4.50902e-126	2	Rarres2
Kcnj8.1	4.08128e-129	4.03261	0.926	0.211	4.61185e-126	2	Kcnj8
Atp1a2.2	5.70777e-127	2.25452	0.97	0.317	6.44978e-124	2	Atp1a2
Ifitm3.2	7.28486e-125	3.09706	0.987	0.507	8.2319e-122	2	Ifitm3
Emp3.1	5.64306e-124	2.80851	0.923	0.314	6.37666e-121	2	Emp3
RGD1564664.2	5.82915e-124	3.19533	0.92	0.283	6.58694e-121	2	RGD1564664
Apoe.2	1.02894e-123	2.52621	1	0.868	1.1627e-120	2	Apoe
Filip1l.2	1.75162e-120	3.05273	0.89	0.241	1.97933e-117	2	Filip1l
Cd9.1	8.30376e-119	-3.90402	0.732	0.946	9.38325e-116	2	Cd9
Fez1.1	1.66895e-118	-3.85481	0.783	0.943	1.88591e-115	2	Fez1
Zap70.2	9.90535e-118	1.83943	0.853	0.309	1.1193e-114	2	Zap70
Serpinh1.2	1.8915e-116	2.34744	0.95	0.352	2.13739e-113	2	Serpinh1
Hapln2.2	3.14546e-115	-2.52961	0.084	0.708	3.55437e-112	2	Hapln2
Ebf1.2	6.95572e-115	2.97258	0.903	0.368	7.85996e-112	2	Ebf1
Pth1r.2	2.48933e-113	3.0437	0.916	0.411	2.81294e-110	2	Pth1r
Map3k7cl.2	1.52207e-110	1.98798	0.866	0.251	1.71994e-107	2	Map3k7cl
Gucy1a1.2	1.80632e-109	2.29779	0.863	0.335	2.04115e-106	2	Gucy1a1
Lrrn1.2	7.77557e-108	-0.737629	0.054	0.635	8.78639e-105	2	Lrrn1
Ptn.2	7.84957e-108	2.48523	0.997	0.817	8.87001e-105	2	Ptn
Agpat4.2	5.07337e-105	-2.0941	0.174	0.792	5.7329e-102	2	Agpat4
Lgals1.2	1.82955e-104	2.72939	0.89	0.349	2.06739e-101	2	Lgals1
Akap12.1	4.53325e-103	2.38079	0.876	0.303	5.12257e-100	2	Akap12
Scd2.2	1.58398e-101	-2.77607	0.589	0.952	1.7899e-98	2	Scd2
Esam.1	2.93656e-101	2.4091	0.846	0.182	3.31831e-98	2	Esam
Art3.2	5.19211e-101	2.29914	0.846	0.178	5.86708e-98	2	Art3
Ak9.1	1.3034e-100	-1.59479	0.12	0.687	1.47284e-97	2	Ak9
Itm2a.1	1.42258e-100	2.61468	0.863	0.274	1.60751e-97	2	Itm2a
Dbi.1	1.57475e-100	-2.40572	0.696	0.967	1.77947e-97	2	Dbi
Atp1b2.2	2.04788e-100	1.4812	0.926	0.38	2.31411e-97	2	Atp1b2
G0s2.2	3.06921e-100	1.9964	0.89	0.428	3.46821e-97	2	G0s2
Tagln2.2	6.37789e-100	2.18501	0.973	0.466	7.20702e-97	2	Tagln2
Ccdc113.2	1.50503e-97	-1.11203	0.057	0.556	1.70068e-94	2	Ccdc113
Calm1.1	1.23951e-93	-2.27155	0.572	0.948	1.40064e-90	2	Calm1
Fdft1.2	4.8213e-93	-1.21134	0.13	0.736	5.44806e-90	2	Fdft1
Sparcl1.1	1.23176e-92	1.12075	0.916	0.372	1.39189e-89	2	Sparcl1
Gucy1b1.2	1.60005e-92	2.33537	0.873	0.402	1.80806e-89	2	Gucy1b1
Nid1.1	1.21972e-91	1.78323	0.86	0.341	1.37828e-88	2	Nid1
Cd63.2	3.04896e-91	1.55453	1	0.968	3.44533e-88	2	Cd63
ENSRNOG00000070586.2	3.04088e-90	-0.839176	0.057	0.604	3.4362e-87	2	ENSRNOG00000070586
Drc1.2	5.09123e-90	-1.59174	0.047	0.512	5.75309e-87	2	Drc1
Sgcb.2	1.07377e-88	-1.31482	0.184	0.743	1.21336e-85	2	Sgcb
Dnali1.2	2.41814e-88	-0.93945	0.077	0.616	2.7325e-85	2	Dnali1
Cabcoco1.2	2.62808e-88	-1.12196	0.124	0.631	2.96973e-85	2	Cabcoco1
Mal.2	5.10835e-88	-3.55264	0.084	0.734	5.77243e-85	2	Mal
Plagl1.2	5.42136e-87	-0.561998	0.047	0.524	6.12613e-84	2	Plagl1
S100b.1	1.58547e-86	-3.51227	0.234	0.787	1.79158e-83	2	S100b
Kif1a.2	3.82553e-85	-1.29075	0.114	0.65	4.32284e-82	2	Kif1a
Cyp51.2	2.99278e-84	-2.31188	0.251	0.784	3.38185e-81	2	Cyp51
Tgfb2.2	2.2681e-82	0.439328	0.783	0.233	2.56296e-79	2	Tgfb2
Pcsk1n.1	9.08265e-82	-1.80269	0.709	0.939	1.02634e-78	2	Pcsk1n
ENSRNOG00000066616.2	1.54794e-81	-3.10614	0.023	0.441	1.74917e-78	2	ENSRNOG00000066616
Col6a1.2	2.19394e-79	2.59083	0.779	0.204	2.47916e-76	2	Col6a1
Ank3.2	2.84574e-79	-1.07806	0.094	0.601	3.21569e-76	2	Ank3
Eml1.2	4.27988e-79	-1.52759	0.134	0.64	4.83626e-76	2	Eml1
Psat1.2	1.4769e-78	-2.15923	0.548	0.8	1.6689e-75	2	Psat1
Cfap299.2	3.0967e-78	-1.47229	0.13	0.556	3.49927e-75	2	Cfap299
Dnajb2.1	6.84815e-77	-1.48824	0.351	0.823	7.73841e-74	2	Dnajb2
Ncam1.2	9.80182e-77	-2.01084	0.629	0.843	1.10761e-73	2	Ncam1
Fxyd1.2	1.68449e-76	2.01405	0.849	0.357	1.90347e-73	2	Fxyd1
Tmem98.1	2.00821e-76	-1.01229	0.187	0.697	2.26928e-73	2	Tmem98
Pex5l.2	1.14195e-75	-2.77469	0.361	0.735	1.29041e-72	2	Pex5l
ENSRNOG00000032922.1	1.28705e-75	-1.3171	0.254	0.782	1.45436e-72	2	ENSRNOG00000032922
Rgcc.1	1.67091e-75	-0.313942	0.114	0.522	1.88813e-72	2	Rgcc
Ndrg1.2	2.70631e-75	-1.44593	0.124	0.578	3.05813e-72	2	Ndrg1
Anln.2	6.44569e-75	-1.44372	0.067	0.581	7.28363e-72	2	Anln
Hmgn2.1	8.5204e-75	-1.43857	0.391	0.867	9.62806e-72	2	Hmgn2
Ndnf.2	9.89636e-75	1.08744	0.766	0.35	1.11829e-71	2	Ndnf
Hist1h2bq.2	5.31915e-74	-1.92174	0.552	0.846	6.01064e-71	2	Hist1h2bq
Fstl1.2	1.32712e-73	2.17388	0.796	0.266	1.49964e-70	2	Fstl1
Shisa4.2	2.01964e-73	-1.97327	0.438	0.763	2.28219e-70	2	Shisa4
Id4.2	3.24056e-73	-2.77488	0.07	0.654	3.66183e-70	2	Id4
Fam183a.2	3.48207e-73	-2.96641	0.154	0.569	3.93474e-70	2	Fam183a
Dctpp1.1	3.48593e-73	-0.59287	0.064	0.575	3.9391e-70	2	Dctpp1
Nkx6-1.2	7.80746e-73	-0.592617	0.054	0.425	8.82243e-70	2	Nkx6-1
Dnah3.2	1.2095e-72	-0.610574	0.013	0.422	1.36674e-69	2	Dnah3
Gsn.2	4.61635e-72	-1.84482	0.167	0.594	5.21647e-69	2	Gsn
Abhd3.2	5.41613e-72	-1.50041	0.512	0.803	6.12022e-69	2	Abhd3
Syt11.2	6.07769e-72	-1.35194	0.171	0.65	6.86779e-69	2	Syt11
Nkain2.2	5.81277e-71	-0.760296	0.084	0.573	6.56843e-68	2	Nkain2
Bcas1.2	1.13112e-69	-1.486	0.268	0.649	1.27816e-66	2	Bcas1
Tm4sf1.2	1.13963e-69	2.46326	0.796	0.359	1.28779e-66	2	Tm4sf1
Kcna1.2	2.35079e-69	-2.43954	0.492	0.737	2.65639e-66	2	Kcna1
Sqle.2	2.56634e-69	-2.01665	0.826	0.892	2.89996e-66	2	Sqle
Cd248.1	3.40514e-69	2.06393	0.786	0.324	3.84781e-66	2	Cd248
Hydin.1	4.06223e-69	-1.13169	0.027	0.559	4.59032e-66	2	Hydin
Cfap44.2	1.2534e-68	-1.32779	0.02	0.448	1.41634e-65	2	Cfap44
Ppp2r2c.2	2.81914e-68	-0.660396	0.057	0.419	3.18562e-65	2	Ppp2r2c
Qdpr.2	3.11603e-68	-3.88424	0.274	0.65	3.52112e-65	2	Qdpr
Gprc5b.2	3.89321e-68	-1.77094	0.151	0.68	4.39932e-65	2	Gprc5b
Itih3.2	1.4941e-67	-0.68381	0.763	0.203	1.68834e-64	2	Itih3
Prnp.1	2.3723e-67	-1.42667	0.522	0.916	2.6807e-64	2	Prnp
Schip1.2	3.89606e-67	-1.42751	0.268	0.754	4.40255e-64	2	Schip1
S100a16.2	5.39194e-67	-1.71144	0.716	0.824	6.0929e-64	2	S100a16
Nudt4.1	1.86756e-66	-2.01039	0.826	0.913	2.11034e-63	2	Nudt4
Zfp462.1	1.52668e-65	-0.956815	0.114	0.547	1.72515e-62	2	Zfp462
Fabp7.1	2.6352e-65	-2.80276	0.719	0.799	2.97778e-62	2	Fabp7
Ank2.2	4.94574e-65	-1.53653	0.321	0.725	5.58869e-62	2	Ank2
Ccdc40.2	7.68632e-65	-1.384	0.01	0.556	8.68554e-62	2	Ccdc40
Tubb6.1	9.47909e-65	1.57685	0.769	0.288	1.07114e-61	2	Tubb6
Grm3.2	1.47672e-64	-1.13637	0.214	0.604	1.6687e-61	2	Grm3
ENSRNOG00000021943.2	6.11653e-64	-0.611928	0.184	0.489	6.91167e-61	2	ENSRNOG00000021943
Akap14.2	7.43698e-64	-1.11296	0.104	0.505	8.40379e-61	2	Akap14
Cdc42ep2.2	7.59706e-64	-1.43911	0.231	0.597	8.58468e-61	2	Cdc42ep2
Slc44a1.2	7.36675e-63	-1.98196	0.294	0.697	8.32443e-60	2	Slc44a1
Foxd1.2	1.20905e-62	1.96028	0.753	0.285	1.36623e-59	2	Foxd1
Mapt.2	3.76917e-62	-1.87269	0.445	0.747	4.25917e-59	2	Mapt
Ezr.1	5.35626e-61	-0.61186	0.154	0.587	6.05258e-58	2	Ezr
Adgrv1.2	3.50322e-60	-1.46454	0.572	0.738	3.95864e-57	2	Adgrv1
Anxa1.2	7.77509e-60	-0.366056	0.084	0.429	8.78585e-57	2	Anxa1
Serinc5.2	9.78437e-60	-0.843599	0.214	0.651	1.10563e-56	2	Serinc5
Enpep.1	4.9792e-59	2.02818	0.736	0.173	5.6265e-56	2	Enpep
Ppp2r2b	6.21366e-59	-0.595542	0.13	0.545	7.02144e-56	2	Ppp2r2b
Rtn4.2	1.17884e-58	-2.09518	0.552	0.877	1.33209e-55	2	Rtn4
Acot7.1	2.91823e-58	1.66089	0.893	0.582	3.2976e-55	2	Acot7
Slc6a20.1	5.01929e-58	2.38776	0.766	0.418	5.6718e-55	2	Slc6a20
ENSRNOG00000063848.1	5.8533e-58	-0.29237	0.746	0.153	6.61423e-55	2	ENSRNOG00000063848
Olfml1.1	2.7968e-57	1.14279	0.839	0.494	3.16039e-54	2	Olfml1
Tuba1b.1	3.60531e-57	-1.2214	0.967	0.991	4.074e-54	2	Tuba1b
Plekhb1.2	5.06745e-57	-1.75034	0.579	0.758	5.72622e-54	2	Plekhb1
ENSRNOG00000024338.2	1.5878e-56	-2.07975	0.415	0.705	1.79422e-53	2	ENSRNOG00000024338
Sox9.2	1.61229e-56	-1.77638	0.672	0.752	1.82189e-53	2	Sox9
Enpp2.2	2.5725e-56	-2.07436	0.301	0.649	2.90692e-53	2	Enpp2
Spa17.2	4.03934e-56	-1.42883	0.12	0.568	4.56446e-53	2	Spa17
Tekt2.2	6.73276e-56	-1.04045	0.04	0.46	7.60802e-53	2	Tekt2
Gsta6.2	9.35179e-56	-1.04415	0.271	0.584	1.05675e-52	2	Gsta6
Lpar1.2	1.45929e-55	-1.58056	0.187	0.635	1.64899e-52	2	Lpar1
Tubb4b.2	2.85332e-55	-1.62481	0.388	0.799	3.22426e-52	2	Tubb4b
NEWGENE-1310680.2	3.25779e-54	-0.473922	0.037	0.373	3.6813e-51	2	NEWGENE-1310680
Capsl.2	7.13348e-54	-1.57336	0.097	0.603	8.06084e-51	2	Capsl
Col4a1.1	9.86457e-54	1.52603	0.839	0.584	1.1147e-50	2	Col4a1
Sh3glb2.2	3.34337e-53	-0.537077	0.164	0.556	3.778e-50	2	Sh3glb2
Srd5a1.2	1.09693e-52	-1.00282	0.087	0.551	1.23953e-49	2	Srd5a1
Adgrl3.2	1.89445e-52	-0.935416	0.197	0.608	2.14072e-49	2	Adgrl3
Lrrc34.2	2.17432e-52	-0.98756	0.217	0.57	2.45698e-49	2	Lrrc34
RT1-Ba.1	2.5649e-52	-0.663228	0.07	0.31	2.89834e-49	2	RT1-Ba
Smpdl3a.1	3.08911e-52	-0.720276	0.268	0.608	3.4907e-49	2	Smpdl3a
Ntrk2.2	3.50187e-52	-1.10482	0.251	0.676	3.95711e-49	2	Ntrk2
Timp1.2	5.31715e-52	1.12069	0.729	0.243	6.00838e-49	2	Timp1
Lamc3.1	7.63936e-52	1.46341	0.702	0.233	8.63248e-49	2	Lamc3
Myrf.2	1.13273e-51	-0.804603	0.204	0.458	1.27998e-48	2	Myrf
Kitlg.2	3.57917e-51	-0.558544	0.144	0.537	4.04446e-48	2	Kitlg
Sec11c.2	3.91419e-51	-3.29469	0.829	0.893	4.42303e-48	2	Sec11c
Mcam.2	8.75977e-51	1.55429	0.776	0.482	9.89854e-48	2	Mcam
Sorl1.1	3.23543e-50	-0.848816	0.134	0.534	3.65603e-47	2	Sorl1
Kcnj10.2	5.15636e-50	-1.36868	0.472	0.697	5.82669e-47	2	Kcnj10
Pfn2.2	7.73756e-50	-0.825034	0.361	0.612	8.74344e-47	2	Pfn2
Smc4.1	3.54869e-49	-0.395522	0.167	0.457	4.01002e-46	2	Smc4
Cdkn1c.1	4.20983e-49	0.845968	0.789	0.433	4.75711e-46	2	Cdkn1c
Ankrd28.2	6.19915e-49	-0.785102	0.268	0.663	7.00504e-46	2	Ankrd28
Cxcl12.1	1.40926e-48	2.28456	0.779	0.525	1.59246e-45	2	Cxcl12
Fgfr2.2	3.71721e-48	-1.13273	0.06	0.516	4.20045e-45	2	Fgfr2
Tspan2.2	8.13308e-48	-2.33719	0.625	0.729	9.19038e-45	2	Tspan2
Bcam.1	1.73282e-47	2.04419	0.722	0.276	1.95809e-44	2	Bcam
Col11a1.2	2.30757e-47	-0.431371	0.074	0.358	2.60756e-44	2	Col11a1
Ak7.2	6.12175e-47	-1.30134	0.013	0.464	6.91758e-44	2	Ak7
Rhou.2	3.62415e-46	-1.50781	0.512	0.698	4.09529e-43	2	Rhou
Ywhaq.2	7.21359e-46	-1.95451	0.619	0.883	8.15135e-43	2	Ywhaq
Rcan2.1	6.42743e-45	-1.1374	0.395	0.703	7.26299e-42	2	Rcan2
Gstp1.2	7.19465e-45	1.08339	0.983	0.872	8.12996e-42	2	Gstp1
Anp32e.1	1.54526e-44	-0.579708	0.241	0.627	1.74614e-41	2	Anp32e
Dact3.2	2.10715e-44	-0.335314	0.134	0.372	2.38108e-41	2	Dact3
Dusp15.2	3.21824e-44	-0.559212	0.184	0.398	3.63661e-41	2	Dusp15
Tecr.2	3.43899e-44	-1.67845	0.903	0.916	3.88605e-41	2	Tecr
Cfap43.2	6.20177e-44	-0.979291	0.234	0.476	7.008e-41	2	Cfap43
Insig1.2	2.21358e-43	-1.14671	0.522	0.72	2.50135e-40	2	Insig1
Plat.2	4.88519e-43	-1.01556	0.281	0.59	5.52026e-40	2	Plat
Cystm1.1	4.99631e-43	-1.01008	0.488	0.784	5.64583e-40	2	Cystm1
Slc1a2.2	5.85338e-43	-0.275074	0.709	0.304	6.61432e-40	2	Slc1a2
Dnm3.2	1.07008e-42	-0.988717	0.291	0.564	1.20919e-39	2	Dnm3
Pllp.2	1.36446e-42	-3.08121	0.619	0.71	1.54184e-39	2	Pllp
Tf.2	1.42095e-42	-3.72707	0.746	0.849	1.60567e-39	2	Tf
Pcdh18.2	2.49457e-42	1.66686	0.682	0.187	2.81887e-39	2	Pcdh18
Cav2	2.52419e-42	-0.451002	0.134	0.335	2.85233e-39	2	Cav2
Hmgn3.2	2.92299e-42	-1.31326	0.645	0.746	3.30298e-39	2	Hmgn3
Mgst3.2	2.93381e-42	1.33086	0.903	0.661	3.31521e-39	2	Mgst3
Adpgk.2	4.12531e-42	-2.06454	0.318	0.576	4.6616e-39	2	Adpgk
Wscd1.2	4.4742e-42	-1.4003	0.438	0.653	5.05584e-39	2	Wscd1
Metrn.1	1.06824e-41	-0.985925	0.445	0.71	1.20711e-38	2	Metrn
Apbb1.2	1.97144e-41	-0.905124	0.271	0.568	2.22773e-38	2	Apbb1
Tpm1.2	4.297e-41	-1.67257	0.465	0.844	4.85561e-38	2	Tpm1
Ralgps2.1	9.61924e-41	0.751879	0.789	0.464	1.08697e-37	2	Ralgps2
Tmem212.2	2.46895e-40	-2.39994	0.682	0.701	2.78991e-37	2	Tmem212
Gpm6b.2	4.24571e-40	-2.19791	0.659	0.742	4.79765e-37	2	Gpm6b
Hivep3	4.48471e-40	-0.368317	0.077	0.44	5.06772e-37	2	Hivep3
Cmtm5.2	1.2696e-39	-2.61404	0.756	0.737	1.43464e-36	2	Cmtm5
Fam166b.2	2.8682e-39	-1.64981	0.722	0.712	3.24107e-36	2	Fam166b
Fyn	3.22346e-39	-0.456931	0.204	0.466	3.64251e-36	2	Fyn
Calb1.2	3.63924e-39	-0.613171	0.074	0.503	4.11234e-36	2	Calb1
Hsd11b1.2	3.90921e-39	1.86534	0.696	0.388	4.4174e-36	2	Hsd11b1
S100a1.1	4.58988e-39	-1.12645	0.609	0.744	5.18656e-36	2	S100a1
Scg5.2	4.89398e-39	-1.90206	0.776	0.737	5.5302e-36	2	Scg5
Sox2.2	1.15256e-38	-2.52903	0.602	0.724	1.3024e-35	2	Sox2
Maob.2	1.35439e-38	-0.257476	0.753	0.252	1.53046e-35	2	Maob
Mt2A.2	1.45163e-38	-1.49735	0.09	0.36	1.64034e-35	2	Mt2A
Ifitm1.1	1.73988e-38	1.798	0.729	0.388	1.96606e-35	2	Ifitm1
Map7.2	2.08185e-38	-1.36527	0.632	0.681	2.35249e-35	2	Map7
Msmo1.2	2.83875e-38	-1.30103	0.622	0.746	3.20779e-35	2	Msmo1
Mlf1.2	3.04189e-38	-2.27059	0.074	0.525	3.43733e-35	2	Mlf1
Atp1b1.1	7.88069e-38	-1.22349	0.816	0.776	8.90518e-35	2	Atp1b1
Gjb1.2	8.3339e-38	-2.38724	0.662	0.687	9.41731e-35	2	Gjb1
Rp1.1	1.12089e-37	-0.380962	0.729	0.242	1.2666e-34	2	Rp1
Tnr.1	3.87754e-37	-0.275857	0.702	0.242	4.38162e-34	2	Tnr
Glul.2	3.88882e-37	-2.56465	0.686	0.848	4.39437e-34	2	Glul
Nnat.2	5.65753e-37	-3.06208	0.625	0.724	6.39301e-34	2	Nnat
Hs3st1.2	7.48183e-37	-1.52284	0.378	0.602	8.45447e-34	2	Hs3st1
Mobp.2	9.75984e-37	-2.52775	0.602	0.71	1.10286e-33	2	Mobp
Slc4a4.1	3.48999e-36	-1.06273	0.261	0.556	3.94369e-33	2	Slc4a4
Gjc3.2	3.84184e-36	-1.65857	0.441	0.625	4.34128e-33	2	Gjc3
Ccdc162.2	5.79913e-36	-0.828281	0.043	0.415	6.55302e-33	2	Ccdc162
Ddr1.1	7.15855e-36	-0.978375	0.425	0.645	8.08916e-33	2	Ddr1
ENSRNOG00000000875.2	3.42845e-35	-1.67989	0.271	0.553	3.87415e-32	2	ENSRNOG00000000875
Grb10	4.59877e-35	0.379256	0.669	0.312	5.19661e-32	2	Grb10
Dner.2	5.37127e-35	-0.620354	0.247	0.466	6.06954e-32	2	Dner
Aldoc.1	8.25453e-35	-1.49787	0.773	0.775	9.32762e-32	2	Aldoc
Epas1.1	8.79867e-35	1.58096	0.679	0.283	9.9425e-32	2	Epas1
Pcdh17.1	1.12686e-34	-0.298038	0.676	0.18	1.27335e-31	2	Pcdh17
Ca4.1	1.1712e-34	1.77064	0.696	0.442	1.32346e-31	2	Ca4
Edil3.2	1.39832e-34	-3.24482	0.776	0.727	1.5801e-31	2	Edil3
Mog.2	2.45125e-34	-2.82365	0.632	0.704	2.76991e-31	2	Mog
Map1a.2	3.49815e-34	-1.74351	0.649	0.709	3.95291e-31	2	Map1a
Ccnd1.2	6.63327e-34	-0.596991	0.799	0.497	7.49559e-31	2	Ccnd1
Mbp.2	1.40488e-33	-3.2906	0.582	0.746	1.58751e-30	2	Mbp
Fermt2.2	2.65311e-33	1.01493	0.95	0.825	2.99801e-30	2	Fermt2
Fnbp1.2	2.81264e-33	-1.37006	0.438	0.635	3.17829e-30	2	Fnbp1
Agrn.1	3.89601e-33	1.40839	0.659	0.217	4.40249e-30	2	Agrn
Ccdc88a.2	5.14534e-33	-1.0441	0.358	0.702	5.81424e-30	2	Ccdc88a
Sirt2.2	6.08425e-33	-1.55139	0.639	0.751	6.87521e-30	2	Sirt2
Myo1d.2	6.50458e-33	-0.332353	0.261	0.461	7.35017e-30	2	Myo1d
Enpp6.2	6.61478e-33	-0.54503	0.107	0.342	7.4747e-30	2	Enpp6
Fcgrt.2	1.66085e-32	1.37972	0.742	0.468	1.87676e-29	2	Fcgrt
ENSRNOG00000064025.1	3.2983e-32	-0.355958	0.107	0.332	3.72708e-29	2	ENSRNOG00000064025
Psip1.1	3.34198e-32	-0.746118	0.605	0.897	3.77644e-29	2	Psip1
C1ql1.2	4.4184e-32	-0.722459	0.746	0.371	4.9928e-29	2	C1ql1
Srgn.1	9.48315e-32	0.40648	0.833	0.62	1.0716e-28	2	Srgn
Atp9a.2	1.38743e-31	-0.635162	0.301	0.53	1.5678e-28	2	Atp9a
Txn1.1	3.32708e-31	0.834799	0.903	0.878	3.7596e-28	2	Txn1
S1pr1	8.89825e-31	-0.333918	0.642	0.289	1.0055e-27	2	S1pr1
Gfap.2	2.00513e-30	-0.487268	0.756	0.376	2.2658e-27	2	Gfap
Bcat1.1	4.4755e-30	-0.705852	0.314	0.543	5.05731e-27	2	Bcat1
Npdc1.2	7.91597e-30	-0.469969	0.194	0.499	8.94505e-27	2	Npdc1
Cdkn2c	1.03073e-29	0.516945	0.656	0.332	1.16473e-26	2	Cdkn2c
Aurkb.2	1.80205e-29	-0.279935	0.03	0.262	2.03632e-26	2	Aurkb
Eml2.1	2.45965e-29	-0.504014	0.294	0.513	2.7794e-26	2	Eml2
Ca3.1	2.58075e-29	-0.405373	0	0.397	2.91625e-26	2	Ca3
Mapk8ip1.2	3.36905e-29	-0.629042	0.351	0.626	3.80703e-26	2	Mapk8ip1
Lgi3.2	3.62249e-29	-0.848393	0.565	0.612	4.09341e-26	2	Lgi3
Cdhr4.2	1.31025e-28	-1.54547	0.247	0.509	1.48059e-25	2	Cdhr4
Dnai4.2	1.73779e-28	-1.7004	0.281	0.471	1.9637e-25	2	Dnai4
Ca14.2	1.97971e-28	-1.27822	0.666	0.655	2.23707e-25	2	Ca14
Ninj2.2	2.68078e-28	-1.85342	0.766	0.686	3.02928e-25	2	Ninj2
Eif1b.2	2.77517e-28	-1.22584	0.873	0.899	3.13594e-25	2	Eif1b
Nfasc.2	4.23487e-28	-1.0177	0.441	0.567	4.78541e-25	2	Nfasc
Olig1.2	6.46073e-28	-2.29864	0.753	0.677	7.30062e-25	2	Olig1
Bcan.2	7.31589e-28	-0.651973	0.716	0.275	8.26695e-25	2	Bcan
Kif21a.2	1.22996e-27	-1.25182	0.652	0.658	1.38985e-24	2	Kif21a
Ldlrap1.2	1.42837e-27	-0.696361	0.371	0.594	1.61405e-24	2	Ldlrap1
Septin4.2	2.11033e-27	0.653465	0.983	0.766	2.38468e-24	2	Septin4
Rab33a.2	3.09225e-27	-1.16834	0.719	0.663	3.49424e-24	2	Rab33a
Ano4.2	3.25481e-27	-0.383603	0.381	0.651	3.67794e-24	2	Ano4
S1pr5.2	3.53292e-27	-1.15454	0.722	0.664	3.9922e-24	2	S1pr5
Prxl2a.1	4.1636e-27	-0.85072	0.639	0.709	4.70487e-24	2	Prxl2a
Ppdpf.2	5.20487e-27	-0.861499	0.749	0.848	5.88151e-24	2	Ppdpf
Pou3f1.1	1.73149e-26	0.517996	0.094	0.255	1.95658e-23	2	Pou3f1
Uchl1.2	2.21135e-26	-1.30962	0.381	0.558	2.49883e-23	2	Uchl1
Cxcl13	2.26444e-26	-0.366781	0.786	0.499	2.55882e-23	2	Cxcl13
Stk39.2	3.98155e-26	-0.369266	0.391	0.741	4.49915e-23	2	Stk39
Ankrd66.2	1.21102e-25	-1.65966	0.445	0.624	1.36846e-22	2	Ankrd66
Nckap1.2	1.45626e-25	-0.522098	0.391	0.63	1.64557e-22	2	Nckap1
Bcl2a1.1	2.28972e-25	0.261392	0.826	0.614	2.58738e-22	2	Bcl2a1
Anks1b.2	2.80726e-25	-1.39213	0.789	0.671	3.17221e-22	2	Anks1b
Sdc4.1	3.15283e-25	-0.443066	0.773	0.426	3.5627e-22	2	Sdc4
Ccn1.2	3.27819e-25	-0.304976	0.729	0.311	3.70436e-22	2	Ccn1
Nkx6-2.2	3.60833e-25	-1.99097	0.709	0.668	4.07741e-22	2	Nkx6-2
Josd2.2	4.05043e-25	-1.52341	0.826	0.771	4.57699e-22	2	Josd2
Pdlim4.2	1.10639e-24	-1.72473	0.258	0.506	1.25022e-21	2	Pdlim4
Ccdc39.2	3.52544e-24	-1.349	0.398	0.534	3.98375e-21	2	Ccdc39
Ube2d1.2	4.06119e-24	-1.62601	0.756	0.764	4.58914e-21	2	Ube2d1
Spock3.2	5.51848e-24	-2.13269	0.742	0.66	6.23588e-21	2	Spock3
Igfbpl1.2	5.71286e-24	-1.41704	0.709	0.644	6.45553e-21	2	Igfbpl1
Tenm3.1	1.02579e-23	-0.526792	0.037	0.309	1.15914e-20	2	Tenm3
Hmgcs1.2	1.09481e-23	-2.11175	0.592	0.657	1.23713e-20	2	Hmgcs1
Septin8.2	2.77382e-23	-1.08046	0.495	0.669	3.13441e-20	2	Septin8
ENSRNOG00000027520.1	4.69738e-23	-0.470501	0.358	0.568	5.30804e-20	2	ENSRNOG00000027520
Arl6ip1.2	5.73013e-23	-0.609633	0.9	0.942	6.47504e-20	2	Arl6ip1
Ptprd.2	5.81882e-23	-1.41272	0.803	0.736	6.57526e-20	2	Ptprd
Cfap45.2	6.77371e-23	-1.38948	0.328	0.481	7.65429e-20	2	Cfap45
RT1-Da.1	1.20496e-22	-0.876183	0.187	0.344	1.36161e-19	2	RT1-Da
Map1b.2	3.1559e-22	-1.14511	0.736	0.735	3.56617e-19	2	Map1b
Srgap3	3.50746e-22	-0.887175	0.712	0.645	3.96343e-19	2	Srgap3
Nedd4.2	1.35225e-21	0.759402	0.896	0.855	1.52804e-18	2	Nedd4
Gpr37.2	1.53163e-21	-1.73697	0.749	0.686	1.73074e-18	2	Gpr37
Hspb1.2	2.80232e-21	0.97035	0.739	0.467	3.16662e-18	2	Hspb1
Gria2.1	3.34354e-21	-0.492703	0.759	0.395	3.7782e-18	2	Gria2
Tshz2.2	3.6491e-21	-0.688058	0.351	0.507	4.12348e-18	2	Tshz2
Phgdh.1	4.07471e-21	-0.942517	0.686	0.624	4.60442e-18	2	Phgdh
Pebp1.2	5.74251e-21	-0.719805	0.953	0.95	6.48904e-18	2	Pebp1
AABR07005985.1.2	8.55838e-21	-1.21925	0.241	0.375	9.67097e-18	2	AABR07005985.1
Acat2.2	9.47852e-21	-0.714204	0.615	0.669	1.07107e-17	2	Acat2
Elavl3.2	1.03749e-20	-1.15334	0.732	0.656	1.17237e-17	2	Elavl3
Rasgrp2.1	1.01154e-19	1.08026	0.602	0.32	1.14304e-16	2	Rasgrp2
Thy1.2	2.77364e-19	0.641321	0.288	0.43	3.13422e-16	2	Thy1
Cfap69.2	3.15579e-19	-1.08549	0.258	0.46	3.56604e-16	2	Cfap69
Map2.1	4.12327e-19	-0.39405	0.689	0.278	4.6593e-16	2	Map2
Hbb-b1.1	6.05209e-19	0.743991	0.88	0.755	6.83886e-16	2	Hbb-b1
Ckap5.1	1.60029e-18	-0.392612	0.418	0.602	1.80833e-15	2	Ckap5
Mmd2.2	1.61538e-18	-0.750645	0.746	0.637	1.82538e-15	2	Mmd2
Jam3.2	2.55764e-18	0.985566	0.866	0.757	2.89013e-15	2	Jam3
Sspn.1	3.11315e-18	0.73763	0.853	0.561	3.51786e-15	2	Sspn
Ccl2.1	4.61261e-18	0.656167	0.294	0.4	5.21225e-15	2	Ccl2
Scrg1.2	5.40678e-18	-1.45634	0.726	0.647	6.10966e-15	2	Scrg1
Rnd3.1	7.60856e-18	1.33207	0.676	0.563	8.59767e-15	2	Rnd3
Phlda1.1	1.61928e-17	1.30865	0.615	0.314	1.82979e-14	2	Phlda1
Ccdc34.2	2.68329e-17	-0.616951	0.515	0.637	3.03212e-14	2	Ccdc34
Ddit4.1	3.73749e-17	-0.267141	0.585	0.72	4.22337e-14	2	Ddit4
Flrt1.1	3.82452e-17	-0.414213	0.716	0.334	4.3217e-14	2	Flrt1
Ccdc170.2	4.96064e-17	-0.412492	0.763	0.421	5.60552e-14	2	Ccdc170
Luzp2.2	7.27483e-17	-1.68408	0.779	0.664	8.22056e-14	2	Luzp2
Itga4	8.14763e-17	0.498867	0.592	0.366	9.20682e-14	2	Itga4
Erich3.1	1.06904e-16	-0.744428	0.301	0.427	1.20802e-13	2	Erich3
Ccdc180.2	1.26456e-16	-0.711035	0.221	0.305	1.42896e-13	2	Ccdc180
Plk2.1	1.97175e-16	-0.264576	0.284	0.418	2.22808e-13	2	Plk2
Rnd2.2	3.1823e-16	-0.929882	0.515	0.561	3.596e-13	2	Rnd2
Pygm.1	7.57904e-16	0.935636	0.609	0.448	8.56431e-13	2	Pygm
Akap2.1	8.97084e-16	1.08647	0.632	0.366	1.0137e-12	2	Akap2
Ybx3.2	1.13292e-15	-0.531763	0.478	0.68	1.2802e-12	2	Ybx3
Tubb3.2	1.27301e-15	-0.348326	0.324	0.4	1.4385e-12	2	Tubb3
Gpr37l1.2	2.60511e-15	-0.610996	0.659	0.316	2.94377e-12	2	Gpr37l1
ENSRNOG00000004564.2	2.63776e-15	-1.73729	0.716	0.6	2.98067e-12	2	ENSRNOG00000004564
Ednrb.2	2.8294e-15	-0.864132	0.435	0.597	3.19722e-12	2	Ednrb
Lrrc36.2	3.0014e-15	-1.30926	0.766	0.624	3.39158e-12	2	Lrrc36
Cfap65.1	3.13497e-15	-0.661992	0.405	0.502	3.54252e-12	2	Cfap65
App.2	3.22752e-15	-1.07274	0.829	0.897	3.6471e-12	2	App
Cavin3.2	4.0914e-15	0.406029	0.773	0.432	4.62328e-12	2	Cavin3
Pgm5.1	4.80001e-15	-0.255905	0.237	0.3	5.42402e-12	2	Pgm5
RT1-Db1.1	4.83364e-15	-0.990135	0.749	0.356	5.46202e-12	2	RT1-Db1
Phyhipl.2	4.83997e-15	-1.24349	0.756	0.639	5.46917e-12	2	Phyhipl
Lef1.1	6.91096e-15	1.07711	0.635	0.51	7.80938e-12	2	Lef1
Gnao1.2	7.89681e-15	-0.92033	0.796	0.706	8.9234e-12	2	Gnao1
Cnp.2	8.23446e-15	-3.52051	0.846	0.754	9.30495e-12	2	Cnp
ENSRNOG00000003786.2	9.14901e-15	-0.425147	0.405	0.622	1.03384e-11	2	ENSRNOG00000003786
Ermn.2	1.36699e-14	-3.42214	0.789	0.735	1.5447e-11	2	Ermn
Dnah7.2	1.38103e-14	-0.65819	0.669	0.275	1.56056e-11	2	Dnah7
Lxn.2	1.47351e-14	-0.938799	0.602	0.656	1.66506e-11	2	Lxn
Phldb2.1	2.35343e-14	1.29661	0.612	0.444	2.65938e-11	2	Phldb2
Resp18.2	2.89832e-14	-0.977674	0.753	0.639	3.2751e-11	2	Resp18
Enkur.2	3.33411e-14	-1.2362	0.485	0.567	3.76755e-11	2	Enkur
Plekhh1.2	4.75663e-14	-1.3781	0.776	0.623	5.375e-11	2	Plekhh1
Nrcam.1	6.38987e-14	-0.384506	0.759	0.438	7.22055e-11	2	Nrcam
Plp1.2	7.43446e-14	-4.88628	0.89	0.858	8.40094e-11	2	Plp1
Mlc1.2	7.61513e-14	-1.14775	0.411	0.544	8.6051e-11	2	Mlc1
Tmeff2.2	1.06546e-13	-1.01502	0.746	0.609	1.20397e-10	2	Tmeff2
Idi1.2	1.15767e-13	-1.33647	0.839	0.745	1.30817e-10	2	Idi1
Csrp2.2	1.22114e-13	-2.81124	0.538	0.619	1.37989e-10	2	Csrp2
Dab2.1	1.35097e-13	0.74532	0.559	0.233	1.52659e-10	2	Dab2
Clic4.2	1.39697e-13	-0.278583	0.458	0.607	1.57858e-10	2	Clic4
H1f2.2	1.42626e-13	-0.522802	0.562	0.696	1.61168e-10	2	H1f2
Spaca9.2	1.42994e-13	-1.55296	0.736	0.603	1.61583e-10	2	Spaca9
Dixdc1.2	2.32225e-13	-1.17337	0.736	0.6	2.62415e-10	2	Dixdc1
Cfap77.2	2.415e-13	-0.884888	0.388	0.478	2.72895e-10	2	Cfap77
Spag6l.2	4.20552e-13	-1.16641	0.615	0.563	4.75223e-10	2	Spag6l
Hmox1.1	4.2926e-13	0.497198	0.726	0.605	4.85063e-10	2	Hmox1
Ccnd2.2	4.46733e-13	-0.5764	0.465	0.659	5.04809e-10	2	Ccnd2
Stmn1.2	5.15731e-13	-3.43769	0.809	0.757	5.82776e-10	2	Stmn1
Pifo.2	5.82453e-13	-1.12874	0.632	0.566	6.58172e-10	2	Pifo
ENSRNOG00000032729.2	6.03541e-13	-1.50649	0.682	0.59	6.82001e-10	2	ENSRNOG00000032729
Pcp4.2	6.05212e-13	-0.521254	0.361	0.365	6.8389e-10	2	Pcp4
Apol3.2	6.7981e-13	1.22771	0.538	0.211	7.68185e-10	2	Apol3
Cryab.2	8.49862e-13	-3.54657	0.799	0.683	9.60344e-10	2	Cryab
Tagln3.1	1.1235e-12	-0.299045	0.639	0.326	1.26955e-09	2	Tagln3
Tgfbi	1.20532e-12	0.503379	0.281	0.308	1.36201e-09	2	Tgfbi
Abca2.2	2.86324e-12	-1.14891	0.548	0.55	3.23546e-09	2	Abca2
ENSRNOG00000039749.2	3.3587e-12	-1.63159	0.736	0.595	3.79533e-09	2	ENSRNOG00000039749
Fa2h.2	3.63911e-12	-1.55049	0.692	0.624	4.11219e-09	2	Fa2h
Igsf11.2	4.06966e-12	-1.05564	0.669	0.588	4.59872e-09	2	Igsf11
Mt3.2	7.57655e-12	-3.90885	0.759	0.774	8.5615e-09	2	Mt3
Trim2.2	1.07687e-11	-1.14014	0.746	0.647	1.21687e-08	2	Trim2
Tuba1c	1.50288e-11	0.323238	0.719	0.579	1.69825e-08	2	Tuba1c
Clip3.2	1.82143e-11	-0.338184	0.435	0.494	2.05821e-08	2	Clip3
Cadm4.2	1.96135e-11	-1.08144	0.548	0.546	2.21632e-08	2	Cadm4
Ttyh1.1	2.35134e-11	-0.739805	0.09	0.328	2.65701e-08	2	Ttyh1
Cfap100.2	2.5791e-11	-1.09482	0.702	0.58	2.91438e-08	2	Cfap100
Ccdc30.2	2.62418e-11	-1.20761	0.535	0.573	2.96533e-08	2	Ccdc30
Nkd1.2	3.24348e-11	-0.483586	0.438	0.513	3.66513e-08	2	Nkd1
Lrrc4b.2	4.01892e-11	-0.481065	0.535	0.579	4.54138e-08	2	Lrrc4b
Cep126.2	5.35695e-11	-0.845579	0.706	0.329	6.05335e-08	2	Cep126
Opalin.2	5.63289e-11	-2.6928	0.793	0.731	6.36517e-08	2	Opalin
Ier3.2	5.88297e-11	0.420293	0.926	0.838	6.64775e-08	2	Ier3
Dynlrb2.2	6.49642e-11	-3.16309	0.769	0.604	7.34095e-08	2	Dynlrb2
Tmeff1.2	6.78344e-11	-1.0061	0.672	0.594	7.66529e-08	2	Tmeff1
Hcar2.1	9.34124e-11	-0.301002	0.846	0.736	1.05556e-07	2	Hcar2
C1qtnf5.2	9.63074e-11	0.924537	0.639	0.529	1.08827e-07	2	C1qtnf5
Spag17.2	1.02501e-10	-1.15911	0.773	0.364	1.15826e-07	2	Spag17
Lmna.2	1.08039e-10	0.729168	0.732	0.619	1.22085e-07	2	Lmna
Septin11.1	1.48594e-10	0.829976	0.605	0.376	1.67911e-07	2	Septin11
Lama2.2	1.60634e-10	0.924052	0.559	0.362	1.81516e-07	2	Lama2
Sptan1.2	1.70646e-10	-0.491441	0.572	0.729	1.9283e-07	2	Sptan1
Faim2.2	1.87962e-10	-1.11615	0.749	0.595	2.12397e-07	2	Faim2
S1pr3.1	2.07444e-10	0.855442	0.615	0.44	2.34411e-07	2	S1pr3
Paqr6.2	2.80525e-10	-0.820428	0.753	0.627	3.16993e-07	2	Paqr6
Ttll7.2	3.04316e-10	-1.85242	0.836	0.721	3.43877e-07	2	Ttll7
ENSRNOG00000049075.2	3.06744e-10	-0.305805	0.528	0.688	3.46621e-07	2	ENSRNOG00000049075
Bnip3.2	4.02226e-10	-0.388509	0.672	0.746	4.54516e-07	2	Bnip3
Nipa1.2	5.03178e-10	-1.1573	0.766	0.678	5.68592e-07	2	Nipa1
Dmd.2	5.44482e-10	-0.377057	0.415	0.502	6.15264e-07	2	Dmd
Vcan.2	6.23932e-10	-0.764967	0.746	0.342	7.05043e-07	2	Vcan
Thbd	1.02016e-09	0.699593	0.301	0.209	1.15278e-06	2	Thbd
Asrgl1.2	1.09632e-09	-0.735608	0.763	0.733	1.23884e-06	2	Asrgl1
Gnai1.2	1.39203e-09	-0.749779	0.635	0.612	1.573e-06	2	Gnai1
Cfap20dc.2	1.49243e-09	-2.77909	0.776	0.666	1.68645e-06	2	Cfap20dc
Selenop.2	1.61407e-09	-1.40369	0.789	0.829	1.8239e-06	2	Selenop
Kndc1.2	2.09415e-09	-1.0823	0.739	0.577	2.36639e-06	2	Kndc1
Rusc1.2	2.3563e-09	-0.683883	0.776	0.794	2.66262e-06	2	Rusc1
Anpep.1	2.92473e-09	0.963174	0.515	0.152	3.30495e-06	2	Anpep
Ephb1.1	3.07408e-09	-0.637309	0.455	0.465	3.47371e-06	2	Ephb1
Gstm1.2	3.17858e-09	-2.30725	0.635	0.678	3.59179e-06	2	Gstm1
Slc5a11.2	3.20592e-09	-0.267347	0.542	0.517	3.62269e-06	2	Slc5a11
Secisbp2l.2	4.24035e-09	-1.35336	0.819	0.74	4.79159e-06	2	Secisbp2l
Id3.2	4.43435e-09	1.49576	0.572	0.417	5.01081e-06	2	Id3
Mns1.2	4.43575e-09	-1.73503	0.415	0.478	5.0124e-06	2	Mns1
Gng8.2	5.17156e-09	-0.899582	0.599	0.615	5.84387e-06	2	Gng8
Cnn3.2	5.30845e-09	-0.314111	0.666	0.834	5.99855e-06	2	Cnn3
Tmem107.2	5.59426e-09	-1.827	0.696	0.67	6.32152e-06	2	Tmem107
Aplp1.2	8.6942e-09	-3.90902	0.753	0.646	9.82445e-06	2	Aplp1
Pcdh9.2	9.34568e-09	-1.34482	0.779	0.619	1.05606e-05	2	Pcdh9
Cav1.1	1.11154e-08	-0.298698	0.729	0.448	1.25604e-05	2	Cav1
Nectin2.1	1.14827e-08	0.330249	0.331	0.445	1.29755e-05	2	Nectin2
H2az1.2	1.82024e-08	-0.300723	0.679	0.893	2.05687e-05	2	H2az1
Olfm1	2.94489e-08	-0.321543	0.441	0.43	3.32773e-05	2	Olfm1
Rbpj.2	4.52075e-08	0.371029	0.846	0.629	5.10844e-05	2	Rbpj
Rsph1.2	4.58318e-08	-1.68791	0.502	0.447	5.179e-05	2	Rsph1
Sh3gl3.2	8.12931e-08	-0.818774	0.763	0.602	9.18612e-05	2	Sh3gl3
Efcab10.2	1.85637e-07	-1.20669	0.716	0.572	0.00020977	2	Efcab10
Tmem47.2	2.12058e-07	-0.431912	0.515	0.571	0.000239625	2	Tmem47
Kcna6.1	2.17084e-07	-0.578626	0.749	0.558	0.000245305	2	Kcna6
Mfsd2a.2	2.17272e-07	-0.405868	0.512	0.472	0.000245518	2	Mfsd2a
Ptgds.2	2.2837e-07	-2.32755	0.819	0.755	0.000258058	2	Ptgds
ENSRNOG00000050647.2	2.31416e-07	0.572227	0.946	0.817	0.0002615	2	ENSRNOG00000050647
Gpm6a.1	2.48799e-07	-0.797944	0.749	0.408	0.000281143	2	Gpm6a
Mag.2	2.81177e-07	-3.26653	0.759	0.713	0.000317729	2	Mag
Myof.2	4.14637e-07	1.23679	0.512	0.271	0.00046854	2	Myof
ENSRNOG00000067240.2	5.0879e-07	-0.829916	0.535	0.48	0.000574932	2	ENSRNOG00000067240
Igfbp5.2	5.12618e-07	-1.33593	0.732	0.393	0.000579258	2	Igfbp5
Pcdhga7.1	5.14201e-07	0.549615	0.686	0.567	0.000581047	2	Pcdhga7
Ncam2.2	5.94884e-07	-1.52773	0.783	0.626	0.000672218	2	Ncam2
Crip2.2	5.95361e-07	0.398973	0.712	0.533	0.000672758	2	Crip2
Hes1	6.00164e-07	0.673673	0.368	0.452	0.000678186	2	Hes1
ENSRNOG00000019926.2	6.55253e-07	-0.865361	0.736	0.565	0.000740436	2	ENSRNOG00000019926
Stmn4.2	6.61857e-07	-3.16942	0.796	0.732	0.000747898	2	Stmn4
ENSRNOG00000066703.1	8.2362e-07	-0.309924	0.649	0.376	0.000930691	2	ENSRNOG00000066703
Serpinb9.1	8.6679e-07	0.362165	0.338	0.381	0.000979473	2	Serpinb9
Aqp4.1	1.18986e-06	-1.51437	0.736	0.393	0.00134455	2	Aqp4
Clec18a.2	1.27721e-06	-0.46915	0.552	0.249	0.00144324	2	Clec18a
Glipr1l1.2	1.29338e-06	-1.01461	0.625	0.563	0.00146152	2	Glipr1l1
Cep290.2	1.72579e-06	-0.757725	0.478	0.444	0.00195015	2	Cep290
Clu.2	1.89829e-06	-2.4094	0.736	0.728	0.00214507	2	Clu
Tubb4a.2	2.0961e-06	-4.14571	0.806	0.734	0.00236859	2	Tubb4a
Itgb8.1	2.76815e-06	-0.571909	0.602	0.494	0.00312801	2	Itgb8
Hba-a2.1	3.27276e-06	0.367213	0.819	0.651	0.00369822	2	Hba-a2
Thra.2	3.52019e-06	-0.250345	0.793	0.803	0.00397782	2	Thra
Cldn11.2	3.86756e-06	-3.4066	0.799	0.713	0.00437034	2	Cldn11
Atf3.1	4.14047e-06	-0.303926	0.682	0.632	0.00467873	2	Atf3
Ugt8.2	4.35308e-06	-2.94861	0.786	0.72	0.00491898	2	Ugt8
Ccnd3	4.8802e-06	0.414615	0.515	0.534	0.00551462	2	Ccnd3
AC128848.1.2	4.99221e-06	-0.669695	0.759	0.409	0.0056412	2	AC128848.1
Sema6d.1	5.88336e-06	0.706002	0.612	0.444	0.0066482	2	Sema6d
Iqcg.2	6.34359e-06	-0.872792	0.689	0.34	0.00716825	2	Iqcg
Crip1.2	1.18272e-05	-1.76993	0.559	0.548	0.0133648	2	Crip1
Rbfox1.2	1.20437e-05	-1.87772	0.726	0.542	0.0136094	2	Rbfox1
Chst2.2	1.23853e-05	-0.266896	0.562	0.591	0.0139954	2	Chst2
Dnah12.2	1.75512e-05	-2.40822	0.659	0.552	0.0198328	2	Dnah12
Ccdc153.2	2.71313e-05	-2.18334	0.739	0.672	0.0306584	2	Ccdc153
Mif.1	2.88111e-05	0.362557	0.953	0.907	0.0325566	2	Mif
Ccl4.1	3.49592e-05	-0.320791	0.773	0.597	0.0395039	2	Ccl4
Tmem125.1.2	4.11853e-05	-1.78387	0.779	0.639	0.0465394	2	Tmem125.1
Apcdd1.2	4.26519e-05	0.798153	0.505	0.306	0.0481966	2	Apcdd1
AABR07007032.1.1	4.48676e-05	0.578871	0.375	0.378	0.0507003	2	AABR07007032.1
RGD1306233.2	5.16087e-05	-1.68249	0.696	0.627	0.0583179	2	RGD1306233
Ctsd	5.22553e-05	-0.260824	0.816	0.838	0.0590485	2	Ctsd
Cebpd.1	5.37803e-05	1.31101	0.545	0.395	0.0607717	2	Cebpd
Flna.1	5.85051e-05	0.686848	0.535	0.313	0.0661108	2	Flna
ENSRNOG00000065062.2	9.16891e-05	-0.522285	0.696	0.512	0.103609	2	ENSRNOG00000065062
Fhad1.2	9.18903e-05	-0.71359	0.712	0.398	0.103836	2	Fhad1
Slc24a2.2	0.000105245	-0.560278	0.749	0.388	0.118926	2	Slc24a2
Csrp1.2	0.000147805	-0.640644	0.639	0.64	0.16702	2	Csrp1
Slain1.2	0.000165572	-1.81682	0.793	0.669	0.187096	2	Slain1
Omg.2	0.000180708	-1.49136	0.793	0.711	0.2042	2	Omg
Fcgr3a.2	0.0001932	-0.306118	0.682	0.588	0.218316	2	Fcgr3a
Lama4	0.00020968	0.811017	0.448	0.107	0.236939	2	Lama4
Cyp2j10.2	0.000279549	-0.740086	0.783	0.506	0.315891	2	Cyp2j10
Chchd10.2	0.00035815	-2.2875	0.742	0.65	0.404709	2	Chchd10
Dbndd2.2	0.000458479	-0.710014	0.92	0.837	0.518082	2	Dbndd2
Sgk1	0.000537825	-0.357337	0.799	0.505	0.607742	2	Sgk1
Zbbx.2	0.000741752	-0.884399	0.572	0.337	0.83818	2	Zbbx
Vcam1	0.000825662	-0.277822	0.759	0.477	0.932998	2	Vcam1
Ripor2.1	0.000913443	0.534879	0.371	0.354	1	2	Ripor2
Dnai3.2	0.00106036	-0.799797	0.749	0.488	1	2	Dnai3
Mettl7a.2	0.00112733	-0.789452	0.799	0.711	1	2	Mettl7a
Cdh13.2	0.00113114	-0.376964	0.682	0.35	1	2	Cdh13
ENSRNOG00000064399.1	0.00121133	-0.637535	0.552	0.47	1	2	ENSRNOG00000064399
ENSRNOG00000018960.2	0.00147331	-0.774721	0.689	0.622	1	2	ENSRNOG00000018960
Rsph9.2	0.00160037	-1.23361	0.609	0.566	1	2	Rsph9
Htra1.2	0.00164717	-0.669186	0.732	0.492	1	2	Htra1
Zcchc12.2	0.00168684	-0.950035	0.756	0.587	1	2	Zcchc12
Lsamp.1	0.00186793	-0.572686	0.739	0.416	1	2	Lsamp
Nr4a3.2	0.00189987	-0.995413	0.732	0.531	1	2	Nr4a3
AABR07056633.1.2	0.00194858	-0.879973	0.522	0.32	1	2	AABR07056633.1
Sox6.1	0.0023229	-0.388931	0.498	0.279	1	2	Sox6
Khdrbs3	0.00253687	0.529523	0.706	0.76	1	2	Khdrbs3
Dnah5.2	0.00256552	-0.7597	0.739	0.552	1	2	Dnah5
Sub1.1	0.00288242	0.30758	0.92	0.855	1	2	Sub1
Apod.2	0.0030966	-2.83607	0.896	0.786	1	2	Apod
Sox8.2	0.00314578	-0.555499	0.729	0.52	1	2	Sox8
Dnah6.2	0.00445828	-0.992946	0.712	0.489	1	2	Dnah6
Carhsp1.2	0.00488501	-0.929945	0.793	0.591	1	2	Carhsp1
Cd93	0.0051955	0.555792	0.334	0.152	1	2	Cd93
Trib2.1	0.00544745	0.489941	0.375	0.341	1	2	Trib2
RGD1565611.2	0.00544963	-1.74049	0.632	0.465	1	2	RGD1565611
Zcchc18.2	0.00665734	-1.36248	0.659	0.489	1	2	Zcchc18
Cxcr4.2	0.00667075	-0.289571	0.381	0.325	1	2	Cxcr4
ENSRNOG00000011006.2	0.00680156	-1.50447	0.696	0.582	1	2	ENSRNOG00000011006
Tmem200c.2	0.0068174	-0.932496	0.763	0.581	1	2	Tmem200c
Crocc.2	0.00696363	-0.738349	0.441	0.377	1	2	Crocc
Olig2.2	0.00835851	-0.849039	0.766	0.415	1	2	Olig2
Bcl2l15.2	0.00850498	-1.63348	0.702	0.58	1	2	Bcl2l15
Gria2.2	6.58254e-45	2.58087	0.986	0.447	7.43827e-42	3	Gria2
Vcan.3	1.13517e-44	3.18152	0.986	0.4	1.28275e-41	3	Vcan
C1ql1.3	2.29138e-43	3.49709	0.971	0.425	2.58926e-40	3	C1ql1
ENSRNOG00000006030.2	7.18401e-42	3.95441	1	0.622	8.11793e-39	3	ENSRNOG00000006030
ENSRNOG00000066703.2	3.69704e-41	1.99136	0.957	0.408	4.17766e-38	3	ENSRNOG00000066703
Serpine2.1	1.82102e-38	2.92987	0.986	0.411	2.05775e-35	3	Serpine2
Flrt1.2	1.9589e-38	2.06896	0.957	0.388	2.21355e-35	3	Flrt1
Gpr37l1.3	5.73084e-38	1.81277	0.971	0.359	6.47585e-35	3	Gpr37l1
ENSRNOG00000019926.3	7.97986e-38	2.98293	0.971	0.582	9.01724e-35	3	ENSRNOG00000019926
Olig2.3	4.50009e-37	2.45447	0.957	0.466	5.0851e-34	3	Olig2
Lsamp.2	6.53749e-34	1.90906	0.928	0.462	7.38736e-31	3	Lsamp
Pcdh17.2	7.13401e-34	2.08316	0.899	0.255	8.06143e-31	3	Pcdh17
Resp18.3	4.57861e-33	2.27444	0.986	0.647	5.17383e-30	3	Resp18
Vegfa.2	9.53471e-33	1.62927	0.928	0.438	1.07742e-29	3	Vegfa
Rarres1.1	4.79116e-32	1.66904	0.913	0.418	5.41401e-29	3	Rarres1
Nrcam.2	5.66463e-32	1.71293	0.928	0.485	6.40104e-29	3	Nrcam
Tnr.2	8.32111e-32	2.0384	0.87	0.313	9.40285e-29	3	Tnr
Olfm1.1	3.96907e-31	1.24438	0.928	0.406	4.48505e-28	3	Olfm1
Lmcd1	6.20689e-31	0.435753	0.812	0.299	7.01378e-28	3	Lmcd1
Olig1.3	8.07407e-31	2.55046	1	0.677	9.1237e-28	3	Olig1
Ccnd1.3	7.37485e-30	4.29818	0.942	0.542	8.33359e-27	3	Ccnd1
Sapcd2	1.11386e-29	0.747408	0.841	0.44	1.25867e-26	3	Sapcd2
ENSRNOG00000065736.1	1.64012e-29	1.11754	0.928	0.544	1.85334e-26	3	ENSRNOG00000065736
Cav2.1	4.38475e-29	2.04559	0.913	0.259	4.95476e-26	3	Cav2
Tagln3.2	1.54026e-28	0.967602	0.884	0.368	1.7405e-25	3	Tagln3
Mpzl1	1.75406e-27	1.74064	0.855	0.216	1.98209e-24	3	Mpzl1
Cav1.2	2.48399e-26	1.59564	0.913	0.487	2.8069e-23	3	Cav1
Il33.1	2.16934e-25	1.12216	0.87	0.453	2.45135e-22	3	Il33
Sox10.2	4.23264e-25	1.40807	0.942	0.614	4.78288e-22	3	Sox10
C1qtnf5.3	4.35451e-25	1.4142	0.928	0.533	4.92059e-22	3	C1qtnf5
Spock2	3.19923e-24	0.885908	0.797	0.346	3.61513e-21	3	Spock2
Scrg1.3	4.0481e-24	1.68997	0.986	0.647	4.57435e-21	3	Scrg1
Anxa6.1	5.244e-24	0.361775	0.841	0.222	5.92572e-21	3	Anxa6
Bcas1.3	7.20833e-24	1.93807	0.942	0.547	8.14542e-21	3	Bcas1
Nsg1.2	8.79917e-24	0.935029	0.826	0.284	9.94307e-21	3	Nsg1
Scg3.2	9.18831e-24	1.27085	0.87	0.49	1.03828e-20	3	Scg3
Slc1a1	1.52851e-23	1.69309	0.812	0.422	1.72722e-20	3	Slc1a1
Snca	9.82034e-23	1.56987	0.783	0.213	1.1097e-19	3	Snca
Fyn.1	1.05742e-22	2.04142	0.884	0.384	1.19489e-19	3	Fyn
Cfap44.3	4.8223e-22	-1.17589	0.014	0.374	5.4492e-19	3	Cfap44
Dbi.2	5.72326e-22	1.05845	1	0.904	6.46728e-19	3	Dbi
Cpe	8.39398e-22	1.36189	0.812	0.196	9.4852e-19	3	Cpe
Ecrg4.1	1.51993e-21	0.662191	0.841	0.564	1.71752e-18	3	Ecrg4
Lxn.3	1.74073e-21	1.18769	0.942	0.629	1.96702e-18	3	Lxn
Trib1	3.40312e-21	0.854515	0.783	0.315	3.84553e-18	3	Trib1
Phyhipl.3	6.16589e-21	2.05398	0.928	0.65	6.96746e-18	3	Phyhipl
Adgb.2	6.43869e-21	-0.867088	0.029	0.413	7.27572e-18	3	Adgb
Fam107a	1.54894e-20	-0.411814	0.029	0.328	1.75031e-17	3	Fam107a
Pcdhga7.2	7.04394e-20	1.14556	0.986	0.572	7.95965e-17	3	Pcdhga7
Iqca1.2	7.73687e-20	-0.954976	0.043	0.427	8.74266e-17	3	Iqca1
Sdc4.2	1.12762e-19	-0.552458	0.116	0.521	1.27421e-16	3	Sdc4
Rnd2.3	1.51897e-19	1.69571	0.899	0.533	1.71643e-16	3	Rnd2
Sncg.2	3.1489e-19	-0.432997	0.058	0.324	3.55826e-16	3	Sncg
Hydin.2	3.31851e-19	-0.997157	0.072	0.464	3.74991e-16	3	Hydin
Rarres2.2	4.98657e-19	-1.61501	0.116	0.462	5.63482e-16	3	Rarres2
Cfap45.3	7.37419e-19	-1.29064	0.029	0.47	8.33283e-16	3	Cfap45
Ccdc40.3	9.29107e-19	-1.23959	0.058	0.458	1.04989e-15	3	Ccdc40
Ppp2r2b.1	1.00095e-18	1.10831	0.87	0.434	1.13107e-15	3	Ppp2r2b
C1ql3	1.36455e-18	1.56728	0.739	0.193	1.54194e-15	3	C1ql3
G0s2.3	1.81588e-18	1.26888	0.87	0.509	2.05194e-15	3	G0s2
Hist3h2ba.2	3.74634e-18	1.37589	0.884	0.602	4.23336e-15	3	Hist3h2ba
Ifitm1.2	3.77281e-18	-1.06635	0.116	0.479	4.26328e-15	3	Ifitm1
Rgs1.1	4.30653e-18	-0.724974	0.159	0.609	4.86638e-15	3	Rgs1
Mapt.3	4.40507e-18	1.15672	0.986	0.666	4.97773e-15	3	Mapt
Gpm6a.2	7.92487e-18	1.56772	0.855	0.462	8.95511e-15	3	Gpm6a
Phlda1.2	8.9213e-18	0.699797	0.928	0.35	1.00811e-14	3	Phlda1
Ccl3	1.13958e-17	-0.507333	0.217	0.66	1.28772e-14	3	Ccl3
Cdca3	1.27217e-17	0.25837	0.072	0.285	1.43755e-14	3	Cdca3
Vcam1.1	1.55124e-17	0.876529	0.812	0.523	1.7529e-14	3	Vcam1
S100a11.2	1.69689e-17	-1.19315	0.13	0.47	1.91748e-14	3	S100a11
Zbbx.3	7.04666e-17	-0.76438	0.13	0.401	7.96272e-14	3	Zbbx
Anxa5.2	1.29571e-16	-1.91575	0.203	0.654	1.46415e-13	3	Anxa5
Maob.3	1.62267e-16	-0.372845	0.043	0.376	1.83362e-13	3	Maob
ENSRNOG00000032729.3	6.00859e-16	1.11474	0.913	0.594	6.7897e-13	3	ENSRNOG00000032729
Dynlrb2.3	1.06399e-15	-2.82993	0.304	0.657	1.20231e-12	3	Dynlrb2
Spag17.3	1.27062e-15	-1.01338	0.174	0.466	1.4358e-12	3	Spag17
Bcan.3	1.57344e-15	1.73516	0.754	0.35	1.77799e-12	3	Bcan
Sox8.3	2.42768e-15	1.00884	0.812	0.552	2.74328e-12	3	Sox8
Crip1.3	3.30127e-15	-2.85464	0.232	0.567	3.73043e-12	3	Crip1
Chst2.3	6.3269e-15	1.12329	0.942	0.566	7.1494e-12	3	Chst2
Cd9.2	1.04994e-14	1.40077	1	0.895	1.18644e-11	3	Cd9
Rgcc.2	1.17319e-14	1.496	0.783	0.415	1.3257e-11	3	Rgcc
Tubb5.1	1.85696e-14	0.887916	0.942	0.767	2.09836e-11	3	Tubb5
Pdlim4.3	2.06757e-14	-1.5605	0.145	0.469	2.33635e-11	3	Pdlim4
Cdkn1a	4.25554e-14	-0.250727	0.058	0.412	4.80877e-11	3	Cdkn1a
Cdhr4.3	1.0135e-13	-1.35946	0.145	0.469	1.14526e-10	3	Cdhr4
Pllp.3	1.38663e-13	1.0375	0.986	0.675	1.56689e-10	3	Pllp
Asrgl1.3	1.75802e-13	0.986353	0.928	0.729	1.98656e-10	3	Asrgl1
Pcsk1n.2	3.21702e-13	1.21258	1	0.884	3.63523e-10	3	Pcsk1n
Iqcg.3	3.30393e-13	-0.754878	0.116	0.431	3.73344e-10	3	Iqcg
Pfn2.3	4.31473e-13	1.24254	0.826	0.544	4.87564e-10	3	Pfn2
Fxyd1.3	5.65538e-13	-0.869676	0.159	0.479	6.39058e-10	3	Fxyd1
Plagl1.3	6.01153e-13	-0.482948	0.217	0.432	6.79303e-10	3	Plagl1
Septin11.2	6.03031e-13	-0.724577	0.116	0.441	6.81425e-10	3	Septin11
Cd59.2	6.93194e-13	-0.978234	0.145	0.491	7.83309e-10	3	Cd59
Adgrl3.3	7.22905e-13	1.07462	0.913	0.499	8.16883e-10	3	Adgrl3
Klf4.1	8.37671e-13	-0.316392	0.217	0.537	9.46569e-10	3	Klf4
S100b.2	9.81742e-13	-2.82577	0.42	0.681	1.10937e-09	3	S100b
Gal3st1.2	2.25525e-12	0.808514	0.812	0.534	2.54843e-09	3	Gal3st1
Acat2.3	2.28293e-12	0.908427	0.87	0.647	2.57972e-09	3	Acat2
Lrrn1.3	2.60293e-12	0.504808	0.884	0.491	2.94131e-09	3	Lrrn1
Sox6.2	2.66399e-12	1.03376	0.739	0.305	3.01031e-09	3	Sox6
Tppp3.1	3.23336e-12	-1.49962	0.594	0.734	3.6537e-09	3	Tppp3
ENSRNOG00000049075.3	3.80823e-12	0.980203	0.928	0.639	4.3033e-09	3	ENSRNOG00000049075
Septin4.3	6.38097e-12	-2.54352	0.783	0.814	7.21049e-09	3	Septin4
ENSRNOG00000003786.3	7.52553e-12	0.999382	0.928	0.556	8.50385e-09	3	ENSRNOG00000003786
Ccl2.2	9.1683e-12	-0.478062	0.768	0.357	1.03602e-08	3	Ccl2
Col1a2.2	1.30852e-11	-0.353384	0.101	0.334	1.47862e-08	3	Col1a2
Vim.2	1.41995e-11	-3.57369	0.406	0.663	1.60454e-08	3	Vim
Cd83.2	1.6343e-11	0.270485	0.855	0.641	1.84675e-08	3	Cd83
Fabp7.2	1.86001e-11	0.742854	0.986	0.771	2.10181e-08	3	Fabp7
ENSRNOG00000024338.3	1.95902e-11	-1.86884	0.362	0.657	2.21369e-08	3	ENSRNOG00000024338
Dnm3.3	2.94125e-11	0.738404	0.884	0.485	3.32361e-08	3	Dnm3
Chl1.1	3.32472e-11	1.20581	0.725	0.399	3.75693e-08	3	Chl1
Cdca8	3.47865e-11	0.301211	0.754	0.356	3.93088e-08	3	Cdca8
ENSRNOG00000028822.2	5.82873e-11	0.613835	0.942	0.683	6.58647e-08	3	ENSRNOG00000028822
Nudt4.2	5.97823e-11	-1.82874	0.797	0.899	6.7554e-08	3	Nudt4
Dnah7.3	1.16891e-10	-0.564802	0.174	0.37	1.32087e-07	3	Dnah7
Gstm1.3	1.27785e-10	-2.61252	0.406	0.682	1.44397e-07	3	Gstm1
Ifit2	1.49506e-10	1.30188	0.696	0.381	1.68942e-07	3	Ifit2
Jam3.3	1.66239e-10	-1.26233	0.652	0.787	1.8785e-07	3	Jam3
Mgp.3	2.37062e-10	0.990967	0.855	0.456	2.6788e-07	3	Mgp
Ifitm3.3	2.4157e-10	-2.84717	0.391	0.622	2.72974e-07	3	Ifitm3
Fgl2	2.4312e-10	-0.43588	0.13	0.379	2.74726e-07	3	Fgl2
Plpp3.1	2.94685e-10	0.462995	0.884	0.529	3.32994e-07	3	Plpp3
Arpp21	4.87879e-10	0.495285	0.667	0.456	5.51303e-07	3	Arpp21
Irf7	6.37196e-10	0.753088	0.551	0.147	7.20031e-07	3	Irf7
AABR07056633.1.3	7.26484e-10	-0.752805	0.203	0.371	8.20927e-07	3	AABR07056633.1
Luzp2.3	7.77985e-10	0.606051	0.942	0.676	8.79123e-07	3	Luzp2
Tuba1b.2	1.01608e-09	0.995626	1	0.985	1.14817e-06	3	Tuba1b
Zcchc12.3	1.60601e-09	-1.02391	0.406	0.635	1.81479e-06	3	Zcchc12
Rp1.2	1.90535e-09	-0.32144	0.145	0.358	2.15304e-06	3	Rp1
Tecr.3	2.20269e-09	0.596403	1	0.908	2.48904e-06	3	Tecr
Ralgps2.2	2.31058e-09	-0.376326	0.319	0.545	2.61096e-06	3	Ralgps2
Gpm6b.3	3.16706e-09	0.645228	0.986	0.71	3.57878e-06	3	Gpm6b
Cadm4.3	5.311e-09	0.609984	0.913	0.528	6.00143e-06	3	Cadm4
Mt2A.3	6.27761e-09	-1.49463	0.159	0.309	7.0937e-06	3	Mt2A
Id4.3	6.78546e-09	-2.29212	0.362	0.537	7.66757e-06	3	Id4
Ednrb.3	8.22539e-09	0.331708	0.928	0.543	9.29469e-06	3	Ednrb
Ankrd28.3	1.15536e-08	0.879227	0.87	0.563	1.30556e-05	3	Ankrd28
Ccdc162.3	1.53725e-08	-0.7204	0.174	0.343	1.7371e-05	3	Ccdc162
ENSRNOG00000013320.2	1.83209e-08	-2.12705	0.522	0.66	2.07026e-05	3	ENSRNOG00000013320
Wscd1.3	2.03825e-08	0.678301	0.899	0.591	2.30322e-05	3	Wscd1
Fcgrt.3	2.47884e-08	0.35691	0.812	0.513	2.80109e-05	3	Fcgrt
Ntrk2.3	3.45822e-08	0.496785	0.87	0.569	3.90778e-05	3	Ntrk2
Tril.2	3.50268e-08	0.699004	0.725	0.418	3.95803e-05	3	Tril
Zic2.1	3.76237e-08	-0.375462	0.725	0.332	4.25147e-05	3	Zic2
ENSRNOG00000049537	3.99037e-08	-0.272909	0.681	0.36	4.50912e-05	3	ENSRNOG00000049537
Plec.2	4.17028e-08	-0.807584	0.217	0.436	4.71242e-05	3	Plec
Crocc.3	4.21725e-08	-0.652369	0.217	0.4	4.76549e-05	3	Crocc
Glul.3	4.56718e-08	-2.32667	0.681	0.82	5.16091e-05	3	Glul
Cd248.2	5.31536e-08	-0.488351	0.768	0.406	6.00636e-05	3	Cd248
Dner.3	6.60528e-08	0.497965	0.812	0.399	7.46397e-05	3	Dner
Metrn.2	7.23622e-08	-0.581455	0.406	0.666	8.17693e-05	3	Metrn
Gstt3.2	7.7853e-08	-1.07067	0.42	0.622	8.79738e-05	3	Gstt3
Ncam2.3	7.99249e-08	0.29894	0.928	0.646	9.03152e-05	3	Ncam2
Nedd4.3	8.92045e-08	0.552526	0.971	0.858	0.000100801	3	Nedd4
Tgfbi.1	9.82776e-08	-0.32485	0.101	0.312	0.000111054	3	Tgfbi
Hmgn3.3	1.05036e-07	0.576426	0.942	0.713	0.000118691	3	Hmgn3
Slc4a4.2	1.25566e-07	-0.989039	0.333	0.501	0.00014189	3	Slc4a4
Aqp4.2	1.318e-07	-0.581061	0.725	0.453	0.000148934	3	Aqp4
Calm1.2	1.36987e-07	-1.29359	0.899	0.865	0.000154795	3	Calm1
NEWGENE-1310680.3	1.59092e-07	-0.3013	0.232	0.304	0.000179774	3	NEWGENE-1310680
AC128848.1.3	1.63041e-07	-0.602114	0.29	0.494	0.000184236	3	AC128848.1
Chchd10.3	1.6492e-07	-2.15757	0.522	0.678	0.00018636	3	Chchd10
Sema6d.2	1.67695e-07	-0.527518	0.217	0.494	0.000189495	3	Sema6d
Tenm3.2	1.89263e-07	-0.431858	0.145	0.256	0.000213867	3	Tenm3
Riiad1.2	2.38939e-07	-1.23154	0.333	0.498	0.000270001	3	Riiad1
Akap12.2	2.9198e-07	-0.628079	0.754	0.409	0.000329937	3	Akap12
Ndnf.3	3.34601e-07	-0.37392	0.406	0.441	0.0003781	3	Ndnf
Dctpp1.2	4.31767e-07	-0.350872	0.29	0.474	0.000487897	3	Dctpp1
Phlda3.2	4.32853e-07	-0.347685	0.188	0.328	0.000489124	3	Phlda3
Ybx3.3	4.8203e-07	-1.18795	0.551	0.641	0.000544694	3	Ybx3
Ca3.2	5.03405e-07	-0.342565	0.246	0.315	0.000568848	3	Ca3
ENSRNOG00000067090	5.3775e-07	-0.313957	0.29	0.523	0.000607658	3	ENSRNOG00000067090
Mog.3	5.60001e-07	-2.15081	0.464	0.701	0.000632802	3	Mog
Csrp2.3	5.83425e-07	-2.92407	0.435	0.61	0.00065927	3	Csrp2
RT1-Db1.2	6.51783e-07	-0.805629	0.261	0.45	0.000736515	3	RT1-Db1
Mns1.3	6.74582e-07	-1.474	0.261	0.475	0.000762278	3	Mns1
Ncam1.3	6.84123e-07	0.978524	0.899	0.792	0.000773059	3	Ncam1
Plp1.3	6.94778e-07	-2.52407	0.696	0.873	0.000785099	3	Plp1
Cfap69.3	7.55079e-07	-1.01597	0.203	0.428	0.000853239	3	Cfap69
Zcchc18.3	7.9667e-07	-0.970402	0.348	0.534	0.000900237	3	Zcchc18
Cpd.2	7.97917e-07	-0.770918	0.551	0.707	0.000901646	3	Cpd
Slc44a1.3	8.01018e-07	0.794447	0.913	0.594	0.00090515	3	Slc44a1
Cfap126.2	8.04547e-07	-2.12069	0.522	0.556	0.000909138	3	Cfap126
Ppp1r32.2	8.80662e-07	-0.926395	0.333	0.526	0.000995148	3	Ppp1r32
Larp6.2	9.31516e-07	-0.383664	0.391	0.598	0.00105261	3	Larp6
Fhad1.3	9.58322e-07	-0.623915	0.739	0.451	0.0010829	3	Fhad1
Ccdc141.2	9.71538e-07	-0.361064	0.174	0.365	0.00109784	3	Ccdc141
H2az1.3	1.34124e-06	0.628039	0.986	0.839	0.0015156	3	H2az1
Pth1r.3	1.53328e-06	-1.01105	0.797	0.506	0.00173261	3	Pth1r
Ak7.3	1.89114e-06	-1.14374	0.232	0.374	0.00213699	3	Ak7
Akr7a3.2	1.97656e-06	-0.255197	0.768	0.472	0.00223351	3	Akr7a3
AABR07017733.1.2	2.07217e-06	0.537351	0.783	0.582	0.00234156	3	AABR07017733.1
Cdh13.3	2.48542e-06	0.899651	0.652	0.409	0.00280852	3	Cdh13
Crip2.3	2.59927e-06	-1.29358	0.464	0.577	0.00293717	3	Crip2
Nckap1.3	2.8309e-06	0.502531	0.826	0.566	0.00319892	3	Nckap1
Epas1.2	3.01289e-06	-0.265042	0.681	0.352	0.00340456	3	Epas1
ENSRNOG00000066616.3	3.15951e-06	-2.9041	0.261	0.356	0.00357024	3	ENSRNOG00000066616
Lpar1.3	3.31271e-06	-1.23868	0.406	0.546	0.00374336	3	Lpar1
Shisa4.3	3.49346e-06	0.292962	0.957	0.679	0.00394761	3	Shisa4
Mmd2.3	3.58487e-06	0.400857	0.783	0.654	0.00405091	3	Mmd2
Ptprd.3	3.6336e-06	-1.38959	0.739	0.751	0.00410597	3	Ptprd
Sorl1.2	3.77777e-06	-0.757883	0.304	0.456	0.00426888	3	Sorl1
Csrp1.3	4.09389e-06	-0.985527	0.449	0.65	0.0046261	3	Csrp1
Aldoc.2	4.35247e-06	0.300482	0.899	0.768	0.00491829	3	Aldoc
ENSRNOG00000038686	4.84419e-06	0.283734	0.594	0.259	0.00547393	3	ENSRNOG00000038686
Ccn1.3	4.86663e-06	-0.586489	0.29	0.407	0.00549929	3	Ccn1
Selenop.3	4.94427e-06	-2.14619	0.884	0.817	0.00558702	3	Selenop
ENSRNOG00000004564.3	4.94975e-06	-1.54974	0.478	0.632	0.00559322	3	ENSRNOG00000004564
Ccdc39.3	5.14086e-06	-1.18486	0.391	0.511	0.00580918	3	Ccdc39
Id3.3	6.01049e-06	-0.380676	0.71	0.437	0.00679185	3	Id3
Plppr5.1	7.22324e-06	0.813271	0.623	0.428	0.00816226	3	Plppr5
Dnah12.3	9.19424e-06	-2.20114	0.435	0.582	0.0103895	3	Dnah12
Tf.3	9.25834e-06	-3.37949	0.884	0.824	0.0104619	3	Tf
Hs3st1.3	1.03369e-05	0.486441	0.855	0.538	0.0116807	3	Hs3st1
Abca2.3	1.06621e-05	-0.770823	0.406	0.557	0.0120482	3	Abca2
Myb.2	1.11254e-05	-0.932182	0.362	0.453	0.0125717	3	Myb
ENSRNOG00000037661.1	1.23228e-05	0.663183	0.71	0.559	0.0139248	3	ENSRNOG00000037661
Pls1.2	1.30914e-05	-0.310695	0.71	0.388	0.0147933	3	Pls1
Plcl1.2	1.74758e-05	-0.781617	0.551	0.651	0.0197477	3	Plcl1
Nnat.3	1.76503e-05	-0.880551	0.957	0.689	0.0199449	3	Nnat
Hspa2.2	2.05452e-05	-1.00365	0.449	0.618	0.0232161	3	Hspa2
Ccn2.1	2.066e-05	-0.346692	0.536	0.24	0.0233458	3	Ccn2
Gfap.3	2.27667e-05	-0.472032	0.29	0.466	0.0257263	3	Gfap
Gucy1a1.3	2.55037e-05	-0.785131	0.71	0.435	0.0288192	3	Gucy1a1
S100a16.3	2.59905e-05	-1.24765	0.739	0.804	0.0293693	3	S100a16
Dnah11.2	2.76772e-05	-0.518275	0.725	0.528	0.0312752	3	Dnah11
Pcdh18.3	2.79821e-05	-0.552043	0.594	0.278	0.0316198	3	Pcdh18
Dbndd2.3	2.84594e-05	-1.17087	0.812	0.857	0.0321591	3	Dbndd2
Gucy1b1.3	2.92366e-05	-0.444951	0.826	0.487	0.0330373	3	Gucy1b1
Gja1.2	3.10865e-05	-2.2124	0.42	0.579	0.0351278	3	Gja1
Fam227a.2	3.50152e-05	-0.760228	0.725	0.447	0.0395672	3	Fam227a
Psat1.3	4.0379e-05	-0.838917	0.594	0.754	0.0456283	3	Psat1
RGD1565611.3	4.16576e-05	-1.55194	0.391	0.506	0.0470731	3	RGD1565611
Josd2.3	4.60239e-05	-1.21545	0.71	0.787	0.052007	3	Josd2
Rusc1.3	4.61981e-05	0.737033	0.928	0.783	0.0522038	3	Rusc1
Gstp1.3	6.44813e-05	-1.23683	0.942	0.894	0.0728639	3	Gstp1
Nid1.2	6.67257e-05	0.758829	0.667	0.441	0.0754001	3	Nid1
Calb1.3	6.70414e-05	-0.513271	0.71	0.395	0.0757568	3	Calb1
Secisbp2l.3	7.58162e-05	-1.257	0.681	0.761	0.0856723	3	Secisbp2l
Rprm.2	8.99293e-05	-0.413497	0.754	0.572	0.10162	3	Rprm
Sox4.2	9.31446e-05	0.416662	0.826	0.679	0.105253	3	Sox4
Mlc1.3	0.000102105	-1.09511	0.406	0.521	0.115378	3	Mlc1
Filip1l.3	0.000115688	-1.24953	0.739	0.362	0.130728	3	Filip1l
Actn1.2	0.00012276	-0.446818	0.754	0.463	0.138719	3	Actn1
Dnah5.3	0.000127531	-0.453424	0.739	0.585	0.14411	3	Dnah5
Mbp.3	0.000127654	-1.28974	0.565	0.718	0.144249	3	Mbp
Sptbn1.1	0.00012956	0.423691	0.797	0.624	0.146403	3	Sptbn1
AABR07028488.1.2	0.000139586	-2.2041	0.536	0.616	0.157732	3	AABR07028488.1
Id2.1	0.000142441	0.767882	0.652	0.532	0.160958	3	Id2
Pcbp4.2	0.000149885	0.317984	0.812	0.621	0.16937	3	Pcbp4
Stmn1.3	0.000149935	-2.83092	0.725	0.77	0.169426	3	Stmn1
Fam183a.3	0.000163155	-2.71854	0.449	0.481	0.184365	3	Fam183a
Anxa2.2	0.000205777	-1.07147	0.42	0.485	0.232528	3	Anxa2
Cxcl12.2	0.000209707	-0.806121	0.406	0.589	0.236969	3	Cxcl12
Fcgr3a.3	0.000213531	-0.427642	0.42	0.618	0.241291	3	Fcgr3a
Mag.3	0.000224933	-1.10642	0.522	0.733	0.254175	3	Mag
Dnah6.3	0.000249884	-0.862652	0.391	0.544	0.282369	3	Dnah6
Cdkl4.2	0.000284618	-0.646	0.71	0.496	0.321619	3	Cdkl4
Cyfip2.2	0.000319868	0.841895	0.609	0.414	0.36145	3	Cyfip2
Sdc2.2	0.000322485	-1.15964	0.536	0.619	0.364408	3	Sdc2
Fez1.2	0.000326071	-1.03853	0.928	0.908	0.36846	3	Fez1
RT1-Da.2	0.00032777	-0.904011	0.261	0.313	0.370381	3	RT1-Da
Cd200.2	0.000330819	0.342586	0.739	0.532	0.373826	3	Cd200
Trim2.3	0.000356462	-0.681929	0.565	0.674	0.402802	3	Trim2
Gpnmb	0.000367918	0.640882	0.58	0.258	0.415747	3	Gpnmb
Foxd1.3	0.000388627	-0.676473	0.667	0.371	0.439149	3	Foxd1
Sptan1.3	0.00039282	-0.905378	0.623	0.699	0.443887	3	Sptan1
Iqgap2.2	0.000401551	-0.828949	0.348	0.455	0.453752	3	Iqgap2
Cd74.1	0.00044688	-1.16789	0.449	0.569	0.504974	3	Cd74
Cep126.3	0.000459638	-0.78397	0.348	0.413	0.519391	3	Cep126
Rrad.3	0.00046409	-1.13704	0.319	0.414	0.524422	3	Rrad
Prxl2a.2	0.000476702	-0.699237	0.696	0.694	0.538673	3	Prxl2a
Caly.2	0.000481216	0.275764	0.783	0.608	0.543774	3	Caly
Cnp.3	0.000483115	-0.388668	0.971	0.763	0.54592	3	Cnp
Atp1a2.3	0.000514451	-0.469802	0.768	0.441	0.581329	3	Atp1a2
Slc24a2.3	0.000515108	-0.381506	0.71	0.453	0.582072	3	Slc24a2
Dnai3.3	0.000552919	-0.688364	0.725	0.534	0.624798	3	Dnai3
[truncated: 407 more rows]
